# Supplementary material for: Large language models in the management of chronic ocular diseases: a scoping review
Source: Front Cell Dev Biol. 2025 Jun 18;13:1608988. doi: 10.3389/fcell.2025.1608988 (PMC12213593; doi:10.3389/fcell.2025.1608988)
Supplement: Supplementary file 2 [file DataSheet1.xls]

## Sheet: savedrecs
Publication Type	Authors	Book Authors	Book Editors	Book Group Authors	Author Full Names	Book Author Full Names	Group Authors	Article Title	Source Title	Book Series Title	Book Series Subtitle	Language	Document Type	Conference Title	Conference Date	Conference Location	Conference Sponsor	Conference Host	Author Keywords	Keywords Plus	Abstract	Addresses	Affiliations	Reprint Addresses	Email Addresses	Researcher Ids	ORCIDs	Funding Orgs	Funding Name Preferred	Funding Text	Cited References	Cited Reference Count	Times Cited, WoS Core	Times Cited, All Databases	180 Day Usage Count	Since 2013 Usage Count	Publisher	Publisher City	Publisher Address	ISSN	eISSN	ISBN	Journal Abbreviation	Journal ISO Abbreviation	Publication Date	Publication Year	Volume	Issue	Part Number
J	Demir, S				Demir, S.			Comparison of ChatGPT-4o, Google Gemini 1.5 Pro, Microsoft Copilot Pro, and Ophthalmologists in the management of uveitis and ocular inflammation: A comparative study of large language models	JOURNAL FRANCAIS D OPHTALMOLOGIE			English	Article						ChatGPT-4o; Google Gemini 1.5 Pro; Microsoft Copilot Pro; LLMs; Uveitis; Ocular inflammation		Purpose. - The aim of this study was to compare the latest large language models (LLMs) ChatGPT-4o, Google Gemini 1.5 Pro and Microsoft Copilot Pro developed by three different companies, with each other and with a group of ophthalmologists, to reveal the strengths and weaknesses of LLMs against each other and against ophthalmologists in the field of uveitis and ocular inflammation. Methods. - Us…	[Demir, S.] Adana 5 Ocak State Hosp, Dept Ophthalmol, Adana, Turkiye		Demir, S (corresponding author), Adana 5 Ocak State Hosp, Dept Ophthalmol, Adana, Turkiye.	dr.suleymandemir@outlook.com							39	0	0	0	0	MASSON EDITEUR	MOULINEAUX CEDEX 9	21 STREET CAMILLE DESMOULINS, ISSY, 92789 MOULINEAUX CEDEX 9, FRANCE	0181-5512	1773-0597		J FR OPHTALMOL	J. Fr. Ophthamol.	APR	2025	48	4
J	Demir, S				Demir, Suleyman			Evaluation of Responses to Questions About Keratoconus Using ChatGPT-4.0, Google Gemini and Microsoft Copilot: A Comparative Study of Large Language Models on Keratoconus	EYE & CONTACT LENS-SCIENCE AND CLINICAL PRACTICE			English	Article						ChatGPT-4.0; Google Gemini; Microsoft Copilot; Artificial intelligence; Keratoconus	INFLAMMATORY MOLECULES; CORNEAL	Objectives: Large language models (LLMs) are increasingly being used today and are becoming increasingly important for providing accurate clinical information to patients and physicians. This study aimed to evaluate the effectiveness of generative pre-trained transforme-4.0 (ChatGPT-4.0), Google Gemini, and Microsoft Copilot LLMs in responding to patient questions regarding keratoconus. Methods: …	[Demir, Suleyman] Adana 5 Ocak State Hosp, Dept Ophthalmol, Adana, Turkiye		Demir, S (corresponding author), Adana 5 Ocak State Hosp, TR-01200 Adana, Turkiye.	ssuleyman810@gmail.com		DEMIR, SULEYMAN/0000-0002-6858-3922					41	1	1	1	1	LIPPINCOTT WILLIAMS & WILKINS	PHILADELPHIA	TWO COMMERCE SQ, 2001 MARKET ST, PHILADELPHIA, PA 19103 USA	1542-2321	1542-233X		EYE CONTACT LENS	Eye Contact Lens-Sci. Clin. Pra.	MAR	2025	51	3
J	Özcan, ZÖ; Dogan, L; Yilmaz, IE				Ozcan, Zeynep Ozer; Dogan, Levent; Yilmaz, Ibrahim Edhem			Artificial Doctors: Performance of Chatbots as a Tool for Patient Education on Keratoconus	EYE & CONTACT LENS-SCIENCE AND CLINICAL PRACTICE			English	Article						Chatbots; Keratoconus; Artificial intelligence; LLMs	DISEASE	Purpose: We aimed to compare the answers given by ChatGPT, Bard, and Copilot and that obtained from the American Academy of Ophthalmology (AAO) website to patient-written questions related to keratoconus in terms of accuracy, understandability, actionability, and readability to find out whether chatbots can be used in patient education. Methods: Twenty patient-written questions obtained from the …	[Ozcan, Zeynep Ozer] Gaziantep State Hosp, Dept Ophthalmol, TR-27470 Gaziantep, Turkiye; [Dogan, Levent] Nigde Omer Halisdemir Univ, Dept Ophthalmol, Nigde, Turkiye; [Yilmaz, Ibrahim Edhem] Gaziantep Dr Ersin Arslan Training & Res Hosp, Dept Ophthalmol, Gaziantep, Turkiye	Cengiz Gokcek Obstetrics & Gynecology Hospital; Dr. Ersin Arslan Education & Research Hospital; Nigde Omer Halisdemir University; Dr. Ersin Arslan Education & Research Hospital	Özcan, ZÖ (corresponding author), Gaziantep State Hosp, Dept Ophthalmol, TR-27470 Gaziantep, Turkiye.	zeynepozerozcan@icloud.com; drleventdogan@gmail.com; dredhemyilmaz@gmail.com		Yilmaz, Ibrahim Edhem/0000-0003-1154-425X; Dogan, Levent/0000-0002-4849-3698					39	0	0	0	0	LIPPINCOTT WILLIAMS & WILKINS	PHILADELPHIA	TWO COMMERCE SQ, 2001 MARKET ST, PHILADELPHIA, PA 19103 USA	1542-2321	1542-233X		EYE CONTACT LENS	Eye Contact Lens-Sci. Clin. Pra.	MAR	2025	51	3
J	Kang, DH; Wu, HK; Yuan, L; Shen, WY; Feng, J; Zhan, J; Grzybowski, A; Sun, W; Jin, K				Kang, Daohuan; Wu, Hongkang; Yuan, Lu; Shen, Wenyue; Feng, Jia; Zhan, Jiao; Grzybowski, Andrzej; Sun, Wen; Jin, Kai			Evaluating the Efficacy of Large Language Models in Guiding Treatment Decisions for Pediatric Refractive Error	OPHTHALMOLOGY AND THERAPY			English	Article; Early Access						ChatGPT-4o; Chatbot; Large language models; Myopia; Refractive error	ARTIFICIAL-INTELLIGENCE; MYOPIA	IntroductionEffective management of pediatric myopia, which includes treatments like corrective lenses and low-dose atropine, requires accurate clinical decisions. However, the complexity of pediatric refractive data, such as variations in visual acuity, axial length, and patient-specific factors, pose challenges to determining optimal treatment. This study aims to evaluate the performance of thr…	[Kang, Daohuan; Yuan, Lu; Feng, Jia; Zhan, Jiao; Sun, Wen] Zhejiang Univ, Childrens Hosp, Natl Clin Res Ctr Child Hlth, Dept Ophthalmol,Sch Med, Hangzhou, Peoples R China; [Wu, Hongkang; Shen, Wenyue; Jin, Kai] Zhejiang Univ, Eye Ctr, Sch Med, Affiliated Hosp 2, Hangzhou, Zhejiang, Peoples R China; [Wu, Hongkang; Shen, Wenyue; Jin, Kai] Zhejiang Prov Engn Inst Eye Dis, Zhejiang Prov Clin Res Ctr …	Zhejiang University; Zhejiang University	Sun, W (corresponding author), Zhejiang Univ, Childrens Hosp, Natl Clin Res Ctr Child Hlth, Dept Ophthalmol,Sch Med, Hangzhou, Peoples R China.;Jin, K (corresponding author), Zhejiang Univ, Eye Ctr, Sch Med, Affiliated Hosp 2, Hangzhou, Zhejiang, Peoples R China.;Jin, K (corresponding author), Zhejiang Prov Engn Inst Eye Dis, Zhejiang Prov Clin Res Ctr Eye Dis, Zhejiang Prov Key Lab Ophthalmol, H…	drsunwen@zju.edu.cn; jinkai@zju.edu.cn	Jin, Kai/GRS-2857-2022; Wu, Hongkang/KFQ-3718-2024	Jin, Kai/0000-0003-4369-2417	Natural Science Foundation of China [82201195, 82201197]	Natural Science Foundation of China(National Natural Science Foundation of China (NSFC))	This work was financially supported by the Natural Science Foundation of China (grant number 82201195, 82201197). The Rapid Service Fee was funded by the authors.		33	0	0	7	7	SPRINGER INT PUBL AG	CHAM	GEWERBESTRASSE 11, CHAM, CH-6330, SWITZERLAND	2193-8245	2193-6528		OPHTHALMOL THER	OPHTHALMOL. THER.	2025 FEB 22	2025
J	Dogan, L; Yilmaz, IE				Dogan, Levent; Yilmaz, Ibrahim Edhem			The performance of ChatGPT-4 and Bing Chat in frequently asked questions about glaucoma	EUROPEAN JOURNAL OF OPHTHALMOLOGY			English	Article; Early Access						Artificial intelligence; ChatGPT; Bing Chat; readability tests; glaucoma; frequently asked questions		Purpose To evaluate the appropriateness and readability of the responses generated by ChatGPT-4 and Bing Chat to frequently asked questions about glaucoma. Method Thirty-four questions were generated for this study. Each question was directed three times to a fresh ChatGPT-4 and Bing Chat interface. The obtained responses were categorised by two glaucoma specialists in terms of their appropriaten…	[Dogan, Levent; Yilmaz, Ibrahim Edhem] Kilis State Hosp, Dept Ophthalmol, TR-79000 Kilis, Turkiye	Kilis State Hospital	Dogan, L (corresponding author), Kilis State Hosp, Dept Ophthalmol, TR-79000 Kilis, Turkiye.	drleventdogan@gmail.com	Yılmaz, İbrahim/KMX-4790-2024	Yilmaz, Ibrahim Edhem/0000-0003-1154-425X; Dogan, Levent/0000-0002-4849-3698					24	0	0	2	2	SAGE PUBLICATIONS LTD	LONDON	1 OLIVERS YARD, 55 CITY ROAD, LONDON EC1Y 1SP, ENGLAND	1120-6721	1724-6016		EUR J OPHTHALMOL	Eur. J. Ophthalmol.	2025 FEB 19	2025
J	Akgun, GG; Altan, C; Balci, AS; Alagoz, N; Çakir, I; Yasar, T				Akgun, Gulsah Gumus; Altan, Cigdem; Balci, Ali Safa; Alagoz, Nese; Cakir, Ihsan; Yasar, Tekin			Using ChatGPT-4 in visual field test assessment	CLINICAL AND EXPERIMENTAL OPTOMETRY			English	Article; Early Access						Artificial intelligence; ChatGPT; large language model; visual field test	GLAUCOMA	Clinical relevanceVisual field testing is essential in the diagnosis and management of various ophthalmic diseases, particularly glaucoma. Integrating ChatGPT-4 into the interpretation of these tests has the potential to aid clinical decision making and improve efficiency and accessibility in clinical practice.BackgroundThis study aims to evaluate the capability of ChatGPT-4 in interpreting visua…	[Akgun, Gulsah Gumus; Altan, Cigdem; Balci, Ali Safa; Alagoz, Nese; Cakir, Ihsan; Yasar, Tekin] Univ Hlth Sci, Beyoglu Eye Training & Res Hosp, Istanbul, Turkiye	University of Health Sciences Turkey	Akgun, GG (corresponding author), Univ Hlth Sci, Beyoglu Eye Training & Res Hosp, Istanbul, Turkiye.	gumus_118_@hotmail.com	ÇAKIR, İHSAN/ITU-1219-2023; Altan, Cigdem/AAL-2041-2020; ALAGÖZ, NEŞE/JZC-7714-2024; Balci, Ali Safa/HKE-3733-2023						33	1	1	1	1	TAYLOR & FRANCIS LTD	ABINGDON	2-4 PARK SQUARE, MILTON PARK, ABINGDON OR14 4RN, OXON, ENGLAND	0816-4622	1444-0938		CLIN EXP OPTOM	Clin. Exp. Optom.	2025 FEB 14	2025
J	Tena, MAS; Alvarez-Peregrina, C; Martinez-Perez, C				Tena, Miguel Angel Sanchez; Alvarez-Peregrina, Cristina; Martinez-Perez, Clara			Evaluation of the perception of information from ChatGPT in myopia education: Perspectives of students and professionals	OPHTHALMIC AND PHYSIOLOGICAL OPTICS			English	Article; Early Access						ChatGPT; myopia; optometry education	OUTDOOR ACTIVITY; PREVALENCE; IMPACT	Purpose: The purpose of this study was to compare the perception and understanding of the information provided by ChatGPT regarding myopia among optometry students, optometrists undertaking a Master degree and practicing optometrists. Methods: This was a cross-sectional descriptive study using a structured questionnaire distributed via Wooclap to 225 participants (125 optometry students, 21 Maste…	[Tena, Miguel Angel Sanchez; Alvarez-Peregrina, Cristina] Univ Complutense Madrid, Fac Opt & Optometry, Dept Optometry & Vis, Madrid, Spain; [Tena, Miguel Angel Sanchez; Martinez-Perez, Clara] ISEC Lisboa Inst Super Educ & Ciencias, Lisbon, Portugal	Complutense University of Madrid	Alvarez-Peregrina, C (corresponding author), Univ Complutense Madrid, Fac Opt & Optometry, Dept Optometry & Vis, Madrid, Spain.	cristina_alvarez@ucm.es	Álvarez-Peregrina, Cristina/AAI-1053-2019	Alvarez-Peregrina, Cristina/0000-0003-1097-4581; Martinez Perez, Clara/0000-0002-0996-5007					41	0	0	1	1	WILEY	HOBOKEN	111 RIVER ST, HOBOKEN 07030-5774, NJ USA	0275-5408	1475-1313		OPHTHAL PHYSL OPT	Ophthalmic Physiol. Opt.	2025 JAN 24	2025
J	Ling, Q; Xu, ZS; Zeng, YM; Hong, Q; Qian, XZ; Hu, JY; Pei, CG; Wei, H; Zou, J; Chen, C; Wang, XY; Chen, X; Wu, ZK; Shao, Y				Ling, Qian; Xu, Zi-Song; Zeng, Yan-Mei; Hong, Qi; Qian, Xian-Zhe; Hu, Jin-Yu; Pei, Chong-Gang; Wei, Hong; Zou, Jie; Chen, Cheng; Wang, Xiao-Yu; Chen, Xu; Wu, Zhen-Kai; Shao, Yi			Assessing the possibility of using large language models in ocular surface diseases	INTERNATIONAL JOURNAL OF OPHTHALMOLOGY			English	Article						ChatGPT-4.0; ChatGPT-3.5; large language models; ocular surface diseases	ARTIFICIAL-INTELLIGENCE; CARE	AIM: To assess the possibility of using different large language models (LLMs) in ocular surface diseases by selecting five different LLMS to test their accuracy in answering specialized questions related to ocular surface diseases: ChatGPT-4, ChatGPT-3.5, Claude 2, PaLM2, and SenseNova. METHODS: A group of experienced ophthalmology professors were asked to develop a 100-question single- choice q…	[Ling, Qian; Xu, Zi-Song; Zeng, Yan-Mei; Hong, Qi; Qian, Xian-Zhe; Hu, Jin-Yu; Pei, Chong-Gang; Wei, Hong; Zou, Jie; Chen, Cheng; Wang, Xiao-Yu] Nanchang Univ, Affiliated Hosp 1, Jiangxi Med Coll, Dept Ophthalmol, Nanchang 330006, Jiangxi, Peoples R China; [Chen, Xu] Maastricht Univ, Ophthalmol Ctr, NL-6200 MS Maastricht, Limburg, Netherlands; [Wu, Zhen-Kai] Cent South Univ, Changde Hosp, Peoples…	Nanchang University; Maastricht University; Central South University; Shanghai Jiao Tong University	Wu, ZK (corresponding author), Cent South Univ, Changde Hosp, Peoples Hosp Changde City 1, Xiangya Sch Med, Changde 415000, Hunan, Peoples R China.;Shao, Y (corresponding author), Shanghai Jiao Tong Univ, Shanghai Gen Hosp, Natl Clin Res Ctr Eye Dis, Dept Ophthalmol,Sch Med, Shanghai 200080, Peoples R China.	18907421671@163.com; freebee99@163.com		Cowan, Charles/0009-0001-0841-0130	National Natural Science Foundation of China [82160195, 82460203]; Degree and Postgraduate Education Teaching Reform Project of Jiangxi Province [JXYJG-2020-026]	National Natural Science Foundation of China(National Natural Science Foundation of China (NSFC)); Degree and Postgraduate Education Teaching Reform Project of Jiangxi Province	Supported by National Natural Science Foundation of China (No.82160195; No.82460203) ; Degree and Postgraduate Education Teaching Reform Project of Jiangxi Province (No.JXYJG-2020-026) .		49	0	0	3	3	IJO PRESS	XI AN	NO 269 YOUYI EAST RD, XI AN, 710054, PEOPLES R CHINA	2222-3959	2227-4898		INT J OPHTHALMOL-CHI	Int. J. Ophthalmol.	JAN 18	2025	18	1
J	Chen, HC; Jiang, ZH; Liu, XY; Xue, CC; Yew, SME; Sheng, B; Zheng, YF; Wang, XF; Wu, Y; Sivaprasad, S; Wong, TY; Chaudhary, V; Tham, YC				Chen, Haichao; Jiang, Zehua; Liu, Xinyu; Xue, Can Can; Yew, Samantha Min Er; Sheng, Bin; Zheng, Ying-Feng; Wang, Xiaofei; Wu, You; Sivaprasad, Sobha; Wong, Tien Yin; Chaudhary, Varun; Tham, Yih Chung			Can large language models fully automate or partially assist paper selection in systematic reviews?	BRITISH JOURNAL OF OPHTHALMOLOGY			English	Article; Early Access						Epidemiology; Public health		Background/aims Large language models (LLMs) have substantial potential to enhance the efficiency of academic research. The accuracy and performance of LLMs in a systematic review, a core part of evidence building, has yet to be studied in detail.Methods We introduced two LLM-based approaches of systematic review: an LLM-enabled fully automated approach (LLM-FA) utilising three different GPT-4 pl…	[Chen, Haichao; Jiang, Zehua; Wong, Tien Yin] Tsinghua Univ, Tsinghua Med, Beijing, Peoples R China; [Liu, Xinyu] Peking Univ, Inst Med Technol, Hlth Sci Ctr, Beijing, Peoples R China; [Xue, Can Can; Zheng, Ying-Feng; Wong, Tien Yin; Tham, Yih Chung] Singapore Natl Eye Ctr, Singapore Eye Res Inst, Singapore, Singapore; [Yew, Samantha Min Er; Tham, Yih Chung] Natl Univ Singapore, Ctr Innovat & Pre…	Tsinghua University; Peking University; National University of Singapore; Singapore National Eye Center; National University of Singapore; National University of Singapore; Shanghai Jiao Tong University; Shanghai Jiao Tong University; Sun Yat Sen University; Beihang University; Tsinghua University; Johns Hopkins University; University of London; University College London; Moorfields Eye Hospital …	Tham, YC (corresponding author), Natl Univ Singapore, Yong Loo Lin Sch Med, Dept Ophthalmol, Singapore, Singapore.;Tham, YC (corresponding author), Duke NUS Med Sch, Ophthalmol & Visual Sci Acad Clin Program, Singapore, Singapore.	chc16@mails.tsinghua.edu.cn; zehuajiang10268@163.com; LIUX0060@e.ntu.edu.sg; xuecancan1992@gmail.com; samantha.yew@nus.edu.sg; shengbin@sjtu.edu.cn; yingfeng.zheng@qq.com; xiaofei.wang@buaa.edu.cn; youwu@tsinghua.edu.cn; sobha.sivaprasad@nhs.net; wongtienyin@tsinghua.edu.cn; vchaudh@mcmaster.ca; thamyc@nus.edu.sg	Zheng, Yingfeng/CAH-4522-2022; Chaudhary, Varun/AAQ-2371-2021; Wang, Xiaofei/HGU-0957-2022; jiang, zehua/JOK-6484-2023; Sivaprasad, S./D-6876-2015; Tham, Yih Chung/IUP-0091-2023; Xue, Can Can/GXG-2544-2022; sheng, bin/KBQ-1776-2024; CHEN, HAICHAO/HRC-8252-2023	Chaudhary, Varun/0000-0002-9988-4146; Sivaprasad, Sobha/0000-0001-8952-0659; Wang, Xiaofei/0000-0002-3175-0344	National Key R & D Program of China [2022YFC2502802]; National Natural Science Fund of China [8238810007]; Beijing Natural Science Foundation [IS23096]	National Key R & D Program of China; National Natural Science Fund of China(National Natural Science Foundation of China (NSFC)); Beijing Natural Science Foundation(Beijing Natural Science Foundation)	The study was supported by National Key R & D Program of China (2022YFC2502802), National Natural Science Fund of China (8238810007) and Beijing Natural Science Foundation (IS23096).		18	0	0	7	7	BMJ PUBLISHING GROUP	LONDON	BRITISH MED ASSOC HOUSE, TAVISTOCK SQUARE, LONDON WC1H 9JR, ENGLAND	0007-1161	1468-2079		BRIT J OPHTHALMOL	Br. J. Ophthalmol.	2025 JAN 15	2025
J	Spina, AC; Fereydouni, P; Tang, JN; Andalib, S; Picton, BG; Fox, AR				Spina, Aidin C.; Fereydouni, Pirooz; Tang, Jordan N.; Andalib, Saman; Picton, Bryce G.; Fox, Austin R.			Tailoring glaucoma education using large language models: Addressing health disparities in patient comprehension	MEDICINE			English	Article						ChatGPT; education; glaucoma; Large Language Model (LLM)		This study evaluates the efficacy of GPT-4, a Large Language Model, in simplifying medical literature for enhancing patient comprehension in glaucoma care. GPT-4 was used to transform published abstracts from 3 glaucoma journals (n = 62) and patient education materials (Patient Educational Model [PEMs], n = 9) to a 5th-grade reading level. GPT-4 was also prompted to generate de novo educational o…	[Spina, Aidin C.; Fereydouni, Pirooz; Tang, Jordan N.; Andalib, Saman; Picton, Bryce G.; Fox, Austin R.] Univ Calif Irvine, Sch Med, Tustin, CA USA; [Fox, Austin R.] Univ Calif Irvine, Gavin Herbert Eye Inst, Sch Med, Irvine, CA USA	University of California System; University of California Irvine; University of California System; University of California Irvine	Spina, AC (corresponding author), 24031 Ironhead Lane, Laguna Niguel, CA 92677 USA.	acspina@hs.uci.edu; fereydop@uci.edu; jntang@hs.uci.edu; sandalib@hs.uci.edu; bpicton@hs.uci.edu; afox2@hs.uci.edu		Fereydouni, Pirooz/0009-0006-2561-9370; Spina, Aidin/0000-0003-3994-9646					33	0	0	2	2	LIPPINCOTT WILLIAMS & WILKINS	PHILADELPHIA	TWO COMMERCE SQ, 2001 MARKET ST, PHILADELPHIA, PA 19103 USA	0025-7974	1536-5964		MEDICINE	Medicine (Baltimore)	JAN 10	2025	104	2
J	Zhao, ZW; Zhang, WY; Chen, XL; Song, F; Gunasegaram, J; Huang, WY; Shi, DL; He, MG; Liu, N				Zhao, Ziwei; Zhang, Weiyi; Chen, Xiaolan; Song, Fan; Gunasegaram, James; Huang, Wenyong; Shi, Danli; He, Mingguang; Liu, Na			Slit Lamp Report Generation and Question Answering: Development and Validation of a Multimodal Transformer Model with Large Language Model Integration	JOURNAL OF MEDICAL INTERNET RESEARCH			English	Article						large language model; slit lamp; medical report generation; question answering	ARTIFICIAL-INTELLIGENCE	Background: Large language models have shown remarkable efficacy in various medical research and clinical applications. However, their skills in medical image recognition and subsequent report generation or question answering (QA) remain limited. Objective: We aim to finetune a multimodal, transformer-based model for generating medical reports from slit lamp images and develop a QA system using L…	[Zhao, Ziwei; Zhang, Weiyi; Chen, Xiaolan; Song, Fan; Shi, Danli; He, Mingguang] Hong Kong Polytech Univ, Sch Optometry, Hong Kong, Peoples R China; [Gunasegaram, James] Monash Univ, Clayton, Vic, Australia; [Huang, Wenyong] Sun Yat Sen Univ, Zhongshan Ophthalm Ctr, Guangzhou, Peoples R China; [Shi, Danli; He, Mingguang] Hong Kong Polytech Univ, Res Ctr SHARP Vis, Hong Kong, Peoples R China; [He,…	Hong Kong Polytechnic University; Monash University; Sun Yat Sen University; Hong Kong Polytechnic University	Liu, N (corresponding author), Guangzhou Cadre & Talent Hlth Management Ctr, 109 Changling Rd, Guangzhou 510700, Peoples R China.	1256695904@qq.com	Shi, Danli/KLD-8383-2024; He, Mingguang/AAY-5239-2020; Zhang, William/JRX-9639-2023; zhao, leaf/HGC-0754-2022	ZHANG, Weiyi/0009-0008-2780-9121; Huang, Wenyong/0000-0002-4894-0937; He, Mingguang/0000-0002-6912-2810; Chen, Xiaolan/0000-0003-1581-5045; Shi, Danli/0000-0001-6094-137X; Gunasegaram, James/0000-0001-5517-986X	Global STEM Professorship Scheme [P0046113]; Henry G. Leong Endowed Professorship in Elderly Vision Health	Global STEM Professorship Scheme; Henry G. Leong Endowed Professorship in Elderly Vision Health	This study was supported by the Global STEM Professorship Scheme (P0046113) and Henry G. Leong Endowed Professorship in Elderly Vision Health. The sponsor or funding organization had no role in the design or conduct of this research. We thank the InnoHK Hong Kong special administrative region government for providing valuable supports.		46	0	0	3	3	JMIR PUBLICATIONS, INC	TORONTO	130 QUEENS QUAY East, Unit 1100, TORONTO, ON M5A 0P6, CANADA	1438-8871			J MED INTERNET RES	J. Med. Internet Res.	DEC 30	2024	26
J	Kianian, R; Sun, DY; Rojas-Carabali, W; Agrawal, R; Tsui, E				Kianian, Reza; Sun, Deyu; Rojas-Carabali, William; Agrawal, Rupesh; Tsui, Edmund			Large Language Models May Help Patients Understand Peer-Reviewed Scientific Articles About Ophthalmology: Development and Usability Study	JOURNAL OF MEDICAL INTERNET RESEARCH			English	Article						uveitis; artificial intelligence; ChatGPT; readability; peer review; large language models; LLMs; health literacy; patient education; medical information; ophthalmology	HEALTH LITERACY	Background: Adequate health literacy has been shown to be important for the general health of a population. To address this, it is recommended that patient-targeted medical information is written at a sixth-grade reading level. To make well-informed decisions about their health, patients may want to interact directly with peer-reviewed open access scientific articles. However, studies have shown …	[Kianian, Reza; Sun, Deyu; Tsui, Edmund] Stein Eye Inst, David Geffen Sch Med, Dept Ophthalmol, 200 Stein Plaza, Los Angeles, CA 90095 USA; [Rojas-Carabali, William; Agrawal, Rupesh] Nanyang Technol Univ, Lee Kong Chian Sch Med, Singapore, Singapore; [Rojas-Carabali, William; Agrawal, Rupesh] Tan Tock Seng Hosp, Natl Healthcare Grp Eye Inst, Singapore, Singapore; [Rojas-Carabali, William; Agrawal…	University of California System; University of California Los Angeles; University of California Los Angeles Medical Center; David Geffen School of Medicine at UCLA; Nanyang Technological University; Tan Tock Seng Hospital	Tsui, E (corresponding author), Stein Eye Inst, David Geffen Sch Med, Dept Ophthalmol, 200 Stein Plaza, Los Angeles, CA 90095 USA.	etsui@mednet.ucla.edu	Rojas-Carabali, William/IWE-3168-2023; Agrawal, Rupesh/AAR-3910-2020	Rojas-Carabali, William/0000-0002-9976-8989; Agrawal, Rupesh/0000-0002-6662-5850	National Eye Institute of the National Institutes of Health [K23EY032990]; Research to Prevent Blindness, Inc (New York)	National Eye Institute of the National Institutes of Health(United States Department of Health & Human ServicesNational Institutes of Health (NIH) - USANIH National Eye Institute (NEI)); Research to Prevent Blindness, Inc (New York)(Research to Prevent Blindness (RPB))	This work is supported in part by the National Eye Institute of the National Institutes of Health under award K23EY032990 (ET) . The content is solely the responsibility of the authors and does not necessarily represent the official views of the National Institutes of Health, and an unrestricted grant from Research to Prevent Blindness, Inc (New York) to the UCLA Stein Eye Institute for research.…		37	0	0	4	4	JMIR PUBLICATIONS, INC	TORONTO	130 QUEENS QUAY East, Unit 1100, TORONTO, ON M5A 0P6, CANADA	1438-8871			J MED INTERNET RES	J. Med. Internet Res.	DEC 24	2024	26
J	Donkor, R; Jammal, AA; Greenfield, DS				Donkor, Richard; Jammal, Alessandro A.; Greenfield, David S.			Relationship between Blood Pressure and Rates of Glaucomatous Visual Field Progression: The Vascular Imaging in Glaucoma Study	OPHTHALMOLOGY			English	Article						Blood pressure; Glaucoma; Glaucoma progression; Optic nerve; Visual field	RISK-FACTORS	Purpose: To examine the relationship between systemic arterial blood pressure (BP) and the rate of change in standard automated perimetry (SAP) in eyes with glaucoma and suspected glaucoma. Design: Prospective cohort study. Participants: One hundred twenty-four eyes (91 eyes with glaucoma, 33 eyes with suspected glaucoma) of 64 patients (mean age, 68.4 +/- 7.6 years) followed up at the Bascom Pal…	[Donkor, Richard; Jammal, Alessandro A.; Greenfield, David S.] Univ Miami, Bascom Palmer Eye Inst, Miller Sch Med, Dept Ophthalmol, Palm Beach Gardens, FL USA	Bascom Palmer Eye Institute	Greenfield, DS (corresponding author), Univ Miami, Bascom Palmer Eye Inst, Miller Sch Med, 7101 Fairway Dr, Palm Beach Gardens, FL 33418 USA.	field@med.miami.edu		DONKOR, RICHRAD/0000-0001-5669-5380					36	0	0	2	2	ELSEVIER SCIENCE INC	NEW YORK	STE 800, 230 PARK AVE, NEW YORK, NY 10169 USA	0161-6420	1549-4713		OPHTHALMOLOGY	Ophthalmology	JAN	2025	132	1
J	Zhao, FF; He, HJ; Liang, JJ; Cen, JY; Wang, Y; Lin, HJ; Chen, FF; Li, TP; Yang, JF; Chen, L; Cen, LP				Zhao, Fang-Fang; He, Han-Jie; Liang, Jia-Jian; Cen, Jingyun; Wang, Yun; Lin, Hongjie; Chen, Feifei; Li, Tai-Ping; Yang, Jian-Feng; Chen, Lan; Cen, Ling-Ping			Benchmarking the performance of large language models in uveitis: a comparative analysis of ChatGPT-3.5, ChatGPT-4.0, Google Gemini, and Anthropic Claude3	EYE			English	Article; Early Access							PATIENT EDUCATION; CARE; QUALITY	Background/Objective This study aimed to evaluate the accuracy, comprehensiveness, and readability of responses generated by various Large Language Models (LLMs) (ChatGPT-3.5, Gemini, Claude 3, and GPT-4.0) in the clinical context of uveitis, utilizing a meticulous grading methodology. Methods Twenty-seven clinical uveitis questions were presented individually to four Large Language Models (LLMs)…	[Zhao, Fang-Fang; He, Han-Jie; Liang, Jia-Jian; Wang, Yun; Lin, Hongjie; Chen, Feifei; Li, Tai-Ping; Yang, Jian-Feng; Chen, Lan] Chinese Univ Hong Kong, Joint Shantou Int Eye Ctr Shantou Univ, Shantou, Guangdong, Peoples R China; [He, Han-Jie] Shantou Univ, Med Coll, Shantou, Guangdong, Peoples R China; [Cen, Jingyun] Shaoguan Univ, Med Coll, Shaoguan, Peoples R China; [Cen, Ling-Ping] Guangdong …	Shantou University; Shaoguan University; Guangdong Medical University	Cen, LP (corresponding author), Guangdong Med Univ, Sch Med Technol, Guangdong Prov Key Lab Med Immunol & Mol Diagnost, Zhanjiang, Peoples R China.	cenlp@hotmail.com	Li, Taiping/ABI-3225-2020; Chen, Feifei/IZE-5314-2023; Yang, Jianfeng/JZE-5052-2024; Cen, Ling-Ping/O-4216-2015	Cen, Ling-Ping/0000-0003-3876-0606	National Natural Science Foundation of China (National Science Foundation of China)	National Natural Science Foundation of China (National Science Foundation of China)(National Natural Science Foundation of China (NSFC))	We extend our sincere appreciation to all participants who contributed to this study.		29	2	2	3	3	SPRINGERNATURE	LONDON	CAMPUS, 4 CRINAN ST, LONDON, N1 9XW, ENGLAND	0950-222X	1476-5454		EYE	Eye	2024 DEC 17	2024
J	Dihan, QA; Brown, AD; Chauhan, MZ; Alzein, AF; Abdelnaem, SE; Kelso, SD; Rahal, DA; Park, R; Ashraf, M; Azzam, A; Morsi, M; Warner, DB; Sallam, AB; Saeed, HN; Elhusseiny, AM				Dihan, Qais A.; Brown, Andrew D.; Chauhan, Muhammad Z.; Alzein, Ahmad F.; Abdelnaem, Seif E.; Kelso, Sean D.; Rahal, Dania A.; Park, Royce; Ashraf, Mohammadali; Azzam, Amr; Morsi, Mahmoud; Warner, David B.; Sallam, Ahmed B.; Saeed, Hajirah N.; Elhusseiny, Abdelrahman M.			Leveraging large language models to improve patient education on dry eye disease	EYE			English	Article; Early Access							READABILITY ASSESSMENT; QUALITY; INFORMATION	BACKGROUND/OBJECTIVES: Dry eye disease (DED) is an exceedingly common diagnosis in patients, yet recent analyses have demonstrated patient education materials (PEMs) on DED to be of low quality and readability. Our study evaluated the utility and performance of three large language models (LLMs) in enhancing and generating new patient education materials (PEMs) on dry eye disease (DED). SUBJECTS/…	[Dihan, Qais A.] Rosalind Franklin Univ Med & Sci, Chicago Med Sch, N Chicago, IL USA; [Dihan, Qais A.; Warner, David B.; Sallam, Ahmed B.; Elhusseiny, Abdelrahman M.] Univ Arkansas Med Sci, Harvey & Bernice Jones Eye Inst, Dept Ophthalmol, Little Rock, AR USA; [Brown, Andrew D.; Chauhan, Muhammad Z.; Rahal, Dania A.] Univ Arkansas Med Sci, UAMS Coll Med, Little Rock, AR USA; [Alzein, Ahmad F.] U…	Chicago Medical School; Rosalind Franklin University of Medicine & Science; University of Arkansas System; University of Arkansas Medical Sciences; University of Arkansas System; University of Arkansas Medical Sciences; University of Illinois System; University of Illinois Chicago; University of Illinois Chicago Hospital; University of Central Arkansas; Texas Christian University; University of I…	Elhusseiny, AM (corresponding author), Univ Arkansas Med Sci, Harvey & Bernice Jones Eye Inst, Dept Ophthalmol, Little Rock, AR USA.;Saeed, HN (corresponding author), Loyola Univ, Med Ctr, Dept Ophthalmol, Maywood, IL 60153 USA.;Elhusseiny, AM (corresponding author), Harvard Med Sch, Boston Childrens Hosp, Dept Ophthalmol, Boston, MA 02115 USA.	hnsaeed@uic.edu; AMELhusseiny@uams.edu	Sallam, Ahmed Mohamed/AAI-8317-2020; Elhusseiny, Abdelrahman/J-8520-2019						45	2	2	5	5	SPRINGERNATURE	LONDON	CAMPUS, 4 CRINAN ST, LONDON, N1 9XW, ENGLAND	0950-222X	1476-5454		EYE	Eye	2024 DEC 16	2024
J	Zhang, JX; Ma, Y; Zhang, R; Chen, YH; Xu, MY; Su, RN; Ma, K				Zhang, Junxiu; Ma, Yao; Zhang, Rong; Chen, Yanhua; Xu, Mengyao; Su, Rina; Ma, Ke			A comparative study of GPT-4o and human ophthalmologists in glaucoma diagnosis	SCIENTIFIC REPORTS			English	Article							ARTIFICIAL-INTELLIGENCE	Artificial intelligence (AI), particularly large language models like GPT-4o, holds promise for enhancing diagnostic accuracy in healthcare. This study evaluates the diagnostic performance of GPT-4o compared to human ophthalmologists in glaucoma cases. A prospective, observational study was conducted at a tertiary care ophthalmology center. Twenty-six glaucoma cases, including both primary and se…	[Zhang, Junxiu; Xu, Mengyao; Ma, Ke] Capital Med Univ, Beijing Tongren Hosp, Beijing Tongren Eye Ctr, Beijing Ophthalmol & Visual Sci Key Lab, Beijing 100730, Peoples R China; [Ma, Yao] Univ Tradit Chinese Med, Affiliated Eye Hosp Shandong, Jinan 250001, Shandong, Peoples R China; [Zhang, Rong] Shanxi Med Univ, Dept Ophthalmol, Shanxi Eye Hosp Affiliated, Taiyuan 030002, Shanxi, Peoples R China; …	Capital Medical University; Shanxi Medical University; Yunnan University	Zhang, JX; Ma, K (corresponding author), Capital Med Univ, Beijing Tongren Hosp, Beijing Tongren Eye Ctr, Beijing Ophthalmol & Visual Sci Key Lab, Beijing 100730, Peoples R China.	zjxeye@mail.ccmu.edu.cn; cdmake@163.com	Xu, Mengyao/ABD-1858-2021; Zhang, Rong/KLC-0982-2024						15	0	0	9	9	NATURE PORTFOLIO	BERLIN	HEIDELBERGER PLATZ 3, BERLIN, 14197, GERMANY	2045-2322			SCI REP-UK	Sci Rep	DEC 5	2024	14	1
J	Ming, S; Guo, XH; Guo, QG; Xie, KP; Chen, DD; Lei, B				Ming, Shuai; Guo, Xiaohong; Guo, Qingge; Xie, Kunpeng; Chen, Dandan; Lei, Bo			Performance of ChatGPT in Ophthalmic Registration and ClinicalDiagnosis:Cross-Sectional Study	JOURNAL OF MEDICAL INTERNET RESEARCH			English	Article						artificial intelligence; chatbot; ChatGPT; ophthalmic registration; clinical diagnosis; AI; cross-sectional study; eye disease; eyedisorder; ophthalmology; health care; outpatient registration; clinical; decision-making; generative AI; vision impairment	ARTIFICIAL-INTELLIGENCE	Background: Artificial intelligence (AI) chatbots such as ChatGPT are expected to impact vision health care significantly.Their potential to optimize the consultation process and diagnostic capabilities across range of ophthalmic subspecialties haveyet to be fully explored.Objective: This study aims to investigate the performance of AI chatbots in recommending ophthalmic outpatient registrationan…	[Ming, Shuai; Guo, Qingge; Xie, Kunpeng; Chen, Dandan; Lei, Bo] Henan Eye Hosp, Henan Prov Peoples Hosp, Henan Eye Inst, Dept Ophthalmol, 7 Weiwu Rd, Zhengzhou, Peoples R China; [Ming, Shuai; Guo, Qingge; Chen, Dandan; Lei, Bo] Henan Acad Innovat Med Sci, Eye Inst, Zhengzhou, Peoples R China; [Lei, Bo] Zhengzhou Univ, Peoples Hosp, Henan Clin Res Ctr Ocular Dis, Zhengzhou, Peoples R China; Zhengz…	Zhengzhou University; Henan Academy of Innovations in Medical Science; Zhengzhou University; Zhengzhou University	Lei, B (corresponding author), Henan Eye Hosp, Henan Prov Peoples Hosp, Henan Eye Inst, Dept Ophthalmol, 7 Weiwu Rd, Zhengzhou, Peoples R China.	bolei99@126.com	guo, xiaohong/GPK-2954-2022; LEI, BO/AAJ-3686-2020	Lei, Bo/0000-0002-5497-0905					46	0	0	6	6	JMIR PUBLICATIONS, INC	TORONTO	130 QUEENS QUAY East, Unit 1100, TORONTO, ON M5A 0P6, CANADA	1438-8871			J MED INTERNET RES	J. Med. Internet Res.	NOV 14	2024	26
J	Su, ZC; Jin, K; Wu, HK; Luo, ZY; Grzybowski, A; Ye, J				Su, Zichang; Jin, Kai; Wu, Hongkang; Luo, Ziyao; Grzybowski, Andrzej; Ye, Juan			Assessment of Large Language Models in Cataract Care Information Provision: A Quantitative Comparison	OPHTHALMOLOGY AND THERAPY			English	Article						Large language models; Cataract; Generative AI; Online consultation; Artificial intelligence		IntroductionCataracts are a significant cause of blindness. While individuals frequently turn to the Internet for medical advice, distinguishing reliable information can be challenging. Large language models (LLMs) have attracted attention for generating accurate, human-like responses that may be used for medical consultation. However, a comprehensive assessment of LLMs' accuracy within specific …	[Su, Zichang; Jin, Kai; Wu, Hongkang; Luo, Ziyao; Ye, Juan] Zhejiang Univ, Affiliated Hosp 2, Eye Ctr, Sch Med, Hangzhou 310009, Peoples R China; [Luo, Ziyao] Zhejiang Univ, Chu Kochen Honors Coll, Hangzhou 310009, Peoples R China; [Grzybowski, Andrzej] Fdn Ophthalmol Dev, Inst Res Ophthalmol, Poznan, Poland	Zhejiang University; Zhejiang University	Jin, K; Ye, J (corresponding author), Zhejiang Univ, Affiliated Hosp 2, Eye Ctr, Sch Med, Hangzhou 310009, Peoples R China.	jinkai@zju.edu.cn; yejuan@zju.edu.cn	Jin, Kai/GRS-2857-2022; Wu, Hongkang/KFQ-3718-2024	Ye, Juan/0000-0002-1948-2500; Jin, Kai/0000-0003-4369-2417	Natural Science Foundation of China [82201195]; National Natural Science Foundation Regional Innovation and Development Joint Fund [U20A20386]; Key Program of the National Natural Science Foundation of China [82330032]; Key Research and Development Program of Zhejiang Province [2024C03204]; Clinical Medical Research Center for Eye Diseases of Zhejiang Province [2021E50007]	Natural Science Foundation of China(National Natural Science Foundation of China (NSFC)); National Natural Science Foundation Regional Innovation and Development Joint Fund; Key Program of the National Natural Science Foundation of China(National Natural Science Foundation of China (NSFC)); Key Research and Development Program of Zhejiang Province; Clinical Medical Research Center for Eye Disease…	This work was financially supported by the Natural Science Foundation of China (grant number 82201195), the National Natural Science Foundation Regional Innovation and Development Joint Fund (U20A20386), Key Program of the National Natural Science Foundation of China (82330032), Key Research and Development Program of Zhejiang Province (2024C03204), and the Clinical Medical Research Center for Ey…		44	1	1	6	6	SPRINGER INT PUBL AG	CHAM	GEWERBESTRASSE 11, CHAM, CH-6330, SWITZERLAND	2193-8245	2193-6528		OPHTHALMOL THER	OPHTHALMOL. THER.	JAN	2025	14	1
J	Balci, AS; Yazar, Z; Ozturk, BT; Altan, C				Balci, Ali Safa; Yazar, Zeliha; Ozturk, Banu Turgut; Altan, Cigdem			Performance of Chatgpt in ophthalmology exam; human versus AI	INTERNATIONAL OPHTHALMOLOGY			English	Article						Artificial intelligence; ChatGPT; Education; Exam; Resident		PurposeThis cross-sectional study focuses on evaluating the success rate of ChatGPT in answering questions from the 'Resident Training Development Exam' and comparing these results with the performance of the ophthalmology residents.MethodsThe 75 exam questions, across nine sections and three difficulty levels, were presented to ChatGPT. The responses and explanations were recorded. The readabili…	[Balci, Ali Safa; Altan, Cigdem] Univ Hlth Sci, Beyoglu Eye Training & Res Hosp, Dept Ophthalmol, TR-34420 Istanbul, Turkiye; [Balci, Ali Safa] Univ Hlth Sci, Sancaktepe Prof Dr Ilhan Varank Training & Res Hos, Dept Ophthalmol, Istanbul, Turkiye; [Yazar, Zeliha] Univ Hlth Sci, Ankara City Hosp, Dept Ophthalmol, Ankara, Turkiye; [Ozturk, Banu Turgut] Selcuk Univ, Fac Med, Dept Ophthalmol, Konya, T…	University of Health Sciences Turkey; City Hospital Ankara; University of Health Sciences Turkey; Selcuk University	Balci, AS (corresponding author), Univ Hlth Sci, Beyoglu Eye Training & Res Hosp, Dept Ophthalmol, TR-34420 Istanbul, Turkiye.	alisafabalci@gmail.com	Altan, Cigdem/AAL-2041-2020; Balci, Ali Safa/HKE-3733-2023						24	2	2	5	5	SPRINGER	DORDRECHT	VAN GODEWIJCKSTRAAT 30, 3311 GZ DORDRECHT, NETHERLANDS	0165-5701	1573-2630		INT OPHTHALMOL	Int. Ophthalmol.	NOV 6	2024	44	1
J	Rampat, R; Debellemanière, G; Gatinel, D; Ting, DSJ				Rampat, Radhika; Debellemaniere, Guillaume; Gatinel, Damien; Ting, Darren S. J.			Artificial intelligence applications in cataract and refractive surgeries	CURRENT OPINION IN OPHTHALMOLOGY			English	Article						artificial intelligence; cataract surgery; machine learning; ophthalmology; refractive surgery	OPHTHALMOLOGY; ACCURACY; CHATGPT; FORMULA	Purpose of reviewThis review highlights the recent advancements in the applications of artificial intelligence within the field of cataract and refractive surgeries. Given the rapid evolution of artificial intelligence technologies, it is essential to provide an updated overview of the significant strides and emerging trends in this field.Recent findingsKey themes include artificial intelligence-…	[Rampat, Radhika] Royal Free London NHS Trust, London, England; [Debellemaniere, Guillaume; Gatinel, Damien] Rothschild Fdn Hosp, Dept Anterior Segment & Refract Surg, Paris, France; [Ting, Darren S. J.] Univ Birmingham, Inst Inflammat & Ageing, Coll Med & Dent Sci, Acad Unit Ophthalmol, Birmingham B15 2TT, England; [Ting, Darren S. J.] Birmingham & Midland Eye Ctr, Sandwell & West Birmingham NHS…	University of London; University College London; Royal Free London NHS Foundation Trust; Fondation Adolphe de Rothschild; University of Birmingham; University of Nottingham	Ting, DSJ (corresponding author), Univ Birmingham, Inst Inflammat & Ageing, Coll Med & Dent Sci, Acad Unit Ophthalmol, Birmingham B15 2TT, England.	ting.darren@gmail.com	rampat, radhika/MIQ-1187-2025		Birmingham Health Partners(BHP) Clinician Scientist Fellowship	Birmingham Health Partners(BHP) Clinician Scientist Fellowship	D.S.J.T. is supported by the Birmingham Health Partners(BHP) Clinician Scientist Fellowship		63	0	0	16	16	LIPPINCOTT WILLIAMS & WILKINS	PHILADELPHIA	TWO COMMERCE SQ, 2001 MARKET ST, PHILADELPHIA, PA 19103 USA	1040-8738	1531-7021		CURR OPIN OPHTHALMOL	Curr. Opin. Ophthalmol.	NOV	2024	35	6
J	Reyhan, AH; Mutaf, Ç; Uzun, I; Yüksekyayla, F				Reyhan, Ali Hakim; Mutaf, Cagri; Uzun, Irfan; Yuksekyayla, Funda			A Performance Evaluation of Large Language Models in Keratoconus: A Comparative Study of ChatGPT-3.5, ChatGPT-4.0, Gemini, Copilot, Chatsonic, and Perplexity	JOURNAL OF CLINICAL MEDICINE			English	Article						keratoconus; chatbots; large language models	EDUCATION MATERIALS; READABILITY	Background: This study evaluates the ability of six popular chatbots; ChatGPT-3.5, ChatGPT-4.0, Gemini, Copilot, Chatsonic, and Perplexity, to provide reliable answers to questions concerning keratoconus. Methods: Chatbots responses were assessed using mDISCERN (range: 15-75) and Global Quality Score (GQS) (range: 1-5) metrics. Readability was evaluated using nine validated readability assessment…	[Reyhan, Ali Hakim; Mutaf, Cagri; Uzun, Irfan; Yuksekyayla, Funda] Harran Univ, Fac Med, Dept Ophthalmol, TR-63100 Sanliurfa, Turkiye	Harran University	Reyhan, AH (corresponding author), Harran Univ, Fac Med, Dept Ophthalmol, TR-63100 Sanliurfa, Turkiye.	alihakimreyhan@gmail.com; drmutaf1985@gmail.com; irfanuzun@gmail.com; f.dilmen@hotmail.com	REYHAN, ALİ/HGE-3076-2022; uzun, irfan/AAD-3379-2022	REYHAN, ALI HAKIM/0000-0001-8402-0954; uzun, irfan/0000-0001-6900-6337					39	1	1	5	5	MDPI	BASEL	ST ALBAN-ANLAGE 66, CH-4052 BASEL, SWITZERLAND		2077-0383		J CLIN MED	J. Clin. Med.	NOV	2024	13	21
J	Kayabasi, M; Köksaldi, S; Engin, CD				Kayabasi, Mustafa; Koksaldi, Seher; Engin, Ceren Durmaz			Evaluating the reliability of the responses of large language models to keratoconus-related questions	CLINICAL AND EXPERIMENTAL OPTOMETRY			English	Article; Early Access						Artificial intelligence; ChatGPT; Copilot; Gemini; keratoconus; large language models	YOUTUBE VIDEOS; READABILITY; INFORMATION; INSTRUMENT; QUALITY	Clinical relevance: Artificial intelligence has undergone a rapid evolution and large language models (LLMs) have become promising tools for healthcare, with the ability of providing human-like responses to questions. The capabilities of these tools in addressing questions related to keratoconus (KCN) have not been previously explored. Background: In this study, the responses were evaluated from …	[Kayabasi, Mustafa; Koksaldi, Seher] Mus State Hosp, Dept Ophthalmol, Mus, Turkiye; [Engin, Ceren Durmaz] Izmir Democracy Univ, Buca Seyfi Demirsoy Educ & Res Hosp, Dept Ophthalmol, Izmir, Turkiye	Mus State Hospital; Izmir Democracy University	Kayabasi, M (corresponding author), Mus State Hosp, Dept Ophthalmol, Mus, Turkiye.	mkayabasi94@gmail.com	Kayabaşı, Mustafa/JHT-7492-2023; Durmaz Engin, Ceren/ACS-0295-2022; Köksaldı, Seher/JBS-1429-2023	Koksaldi, Seher/0000-0001-8235-4088; Kayabasi, Mustafa/0000-0003-2059-0696					41	1	1	4	4	TAYLOR & FRANCIS LTD	ABINGDON	2-4 PARK SQUARE, MILTON PARK, ABINGDON OR14 4RN, OXON, ENGLAND	0816-4622	1444-0938		CLIN EXP OPTOM	Clin. Exp. Optom.	2024 OCT 26	2024
J	Silva-Rodríguez, J; Chakor, H; Kobbi, R; Dolz, J; Ben Ayed, I				Silva-Rodriguez, Julio; Chakor, Hadi; Kobbi, Riadh; Dolz, Jose; Ben Ayed, Ismail			A Foundation Language-Image Model of the Retina (FLAIR): encoding expert knowledge in text supervision	MEDICAL IMAGE ANALYSIS			English	Article						Foundation models; Fundus image analysis; Vision-language pre-training; Expert knowledge	DIABETIC-RETINOPATHY; AUTOMATED EXTRACTION; BLOOD-VESSELS; OPTIC-NERVE; IDENTIFICATION; FRAMEWORK; CATARACT; DATASET	Foundation vision-language models are currently transforming computer vision, and are on the rise in medical imaging fueled by their very promising generalization capabilities. However, the initial attempts to transfer this new paradigm to medical imaging have shown less impressive performances than those observed in other domains, due to the significant domain shift and the complex, expert domai…	[Silva-Rodriguez, Julio; Dolz, Jose; Ben Ayed, Ismail] ETS Montreal, Quebec City, PQ, Canada; [Chakor, Hadi; Kobbi, Riadh] DIAGNOS Inc, Quebec City, PQ, Canada; [Ben Ayed, Ismail] Ctr Rech Ctr Hosp Univ Montreal CR CHUM, Quebec City, PQ, Canada	University of Quebec; Ecole de Technologie Superieure - Canada	Silva-Rodríguez, J (corresponding author), ETS Montreal, Quebec City, PQ, Canada.	julio-jose.silva-rodriguez@etsmtl.ca	Dolz, Jose/Y-5756-2019; Colomer, Adrián/GZM-7967-2022	Dolz, Jose/0000-0002-2436-7750	Fonds de recherche du Quebec (FRQ) under the Postdoctoral Merit Scholarship for Foreign Students (PBEEE); PROMPT Quebec, via its PARTNERSHIP-AI program	Fonds de recherche du Quebec (FRQ) under the Postdoctoral Merit Scholarship for Foreign Students (PBEEE); PROMPT Quebec, via its PARTNERSHIP-AI program	The work of J. Silva-Rodriguez was partially funded by the Fonds de recherche du Quebec (FRQ) under the Postdoctoral Merit Scholarship for Foreign Students (PBEEE) . The work is supported, in part, by PROMPT Quebec, via its PARTNERSHIP-AI program. We also thank Calcul Quebec and Compute Canada.		116	0	0	14	14	ELSEVIER	AMSTERDAM	RADARWEG 29, 1043 NX AMSTERDAM, NETHERLANDS	1361-8415	1361-8423		MED IMAGE ANAL	Med. Image Anal.	JAN	2025	99
J	Jaskari, J; Sahlsten, J; Summanen, P; Moilanen, J; Lehtola, E; Aho, M; Säpyskä, E; Hietala, K; Kaski, K				Jaskari, Joel; Sahlsten, Jaakko; Summanen, Paula; Moilanen, Jukka; Lehtola, Erika; Aho, Marjo; Sapyska, Elina; Hietala, Kustaa; Kaski, Kimmo			DR-GPT: A large language model for medical report analysis of diabetic retinopathy patients	PLOS ONE			English	Article								Diabetic retinopathy (DR) is a sight-threatening condition caused by diabetes. Screening programmes for DR include eye examinations, where the patient's fundi are photographed, and the findings, including DR severity, are recorded in the medical report. However, statistical analyses based on DR severity require structured labels that calls for laborious manual annotation process if the report for…	[Jaskari, Joel; Sahlsten, Jaakko; Kaski, Kimmo] Aalto Univ, Dept Comp Sci, Espoo, Finland; [Summanen, Paula; Moilanen, Jukka; Lehtola, Erika] Univ Helsinki, Dept Ophthalmol, Helsinki, Finland; [Summanen, Paula; Moilanen, Jukka; Lehtola, Erika] Helsinki Univ Hosp, Helsinki, Finland; [Aho, Marjo; Sapyska, Elina] Helsinki Univ Hosp, Dept Ophthalmol, Helsinki, Finland; [Aho, Marjo; Sapyska, Elina] Un…	Aalto University; University of Helsinki; University of Helsinki; Helsinki University Central Hospital; University of Helsinki; Helsinki University Central Hospital; University of Helsinki; Central Finland Central Hospital	Kaski, K (corresponding author), Aalto Univ, Dept Comp Sci, Espoo, Finland.;Kaski, K (corresponding author), Alan Turing Inst, London, England.	kimmo.kaski@aalto.fi	Summanen, Paula/D-5897-2014; Kaski, Kimmo/AAO-4320-2021	Jaskari, Joel/0000-0002-6154-2378; Kaski, Kimmo/0000-0002-3805-9687	Glaucoma Foundation Lux; Silmasaatio Foundation; Research Council of Finland [345449]; Evald and Hilda Nissi Foundation	Glaucoma Foundation Lux; Silmasaatio Foundation(ACEV Foundation); Research Council of Finland(Research Council of Finland); Evald and Hilda Nissi Foundation	J.J. & J.S. Glaucoma Foundation Lux (https://glaukoomatukisaatiolux.fi/), Silmasaatio Foundation (https://www.silmaesaeaetioe.fi/), and Grant Number 345449 Research Council of Finland (https://www.aka.fi/en/); E.S. & M.A. Evald and Hilda Nissi Foundation (https://www.nissinsaatio.fi/index_en.htm). The funders did not play any role in the study design, data collection, analysis, decision to publis…		25	0	0	8	8	PUBLIC LIBRARY SCIENCE	SAN FRANCISCO	1160 BATTERY STREET, STE 100, SAN FRANCISCO, CA 94111 USA	1932-6203			PLOS ONE	PLoS One	OCT 11	2024	19	10
J	Ghalibafan, S; Gonzalez, DJT; Cai, LZ; Chou, BG; Panneerselvam, S; Barrett, SC; Djulbegovic, MB; Yannuzzi, NA				Ghalibafan, Seyyedehfatemeh; Gonzalez, David J. Taylor; Cai, Louis Z.; Chou, Brandon Graham; Panneerselvam, Sugi; Barrett, Spencer Conrad; Djulbegovic, Mak B.; Yannuzzi, Nicolas A.			APPLICATIONS OF MULTIMODAL GENERATIVE ARTIFICIAL INTELLIGENCE IN A REAL-WORLD RETINA CLINIC SETTING	RETINA-THE JOURNAL OF RETINAL AND VITREOUS DISEASES			English	Article						LLM; AI; ChatGPT-4 vision; GPT-4 turbo with vision; OpenAI; vitreoretinal diseases; retina clinic; accuracy	MACULAR DEGENERATION; IMAGES	Supplemental Digital Content is Available in the Text.Generative Pre-trained Transformer 4 with vision aids clinical care and medical record keeping using standardized multiple-choice questions. Its effectiveness in complex, open-ended medical scenarios, especially in retina clinics, is limited, highlighting constraints in offering ocular health advice. Purpose:This study evaluates a large langua…	[Ghalibafan, Seyyedehfatemeh; Gonzalez, David J. Taylor; Cai, Louis Z.; Chou, Brandon Graham; Panneerselvam, Sugi; Barrett, Spencer Conrad; Yannuzzi, Nicolas A.] Univ Miami, Miller Sch Med, Bascom Palmer Eye Inst, Dept Ophthalmol, 900 NW 17th St, Miami, FL 33136 USA; [Djulbegovic, Mak B.] Thomas Jefferson Univ, Wills Eye Hosp, Philadelphia, PA USA	Bascom Palmer Eye Institute; University of Miami; Thomas Jefferson University	Yannuzzi, NA (corresponding author), Univ Miami, Miller Sch Med, Bascom Palmer Eye Inst, Dept Ophthalmol, 900 NW 17th St, Miami, FL 33136 USA.	sxg2042@miami.edu; davidjtaylor@med.miami.edu; louiscai@med.miami.edu; brandonchou@med.miami.edu; sxp3475@med.miami.edu; scb220@med.miami.edu; Myd043@jefferson.edu; nay7@med.miami.edu			Macula Foundation	Macula Foundation	Supported by the Macula Foundation.		29	1	1	4	4	LIPPINCOTT WILLIAMS & WILKINS	PHILADELPHIA	TWO COMMERCE SQ, 2001 MARKET ST, PHILADELPHIA, PA 19103 USA	0275-004X	1539-2864		RETINA-J RET VIT DIS	Retin.-J. Retin. Vitr. Dis.	OCT	2024	44	10
J	Bahir, D; Zur, O; Attal, L; Nujeidat, Z; Knaanie, A; Pikkel, J; Mimouni, M; Plopsky, G				Bahir, Daniel; Zur, Omri; Attal, Leah; Nujeidat, Zaki; Knaanie, Ariela; Pikkel, Joseph; Mimouni, Michael; Plopsky, Gilad			Gemini AI vs. ChatGPT: A comprehensive examination alongside ophthalmology residents in medical knowledge	GRAEFES ARCHIVE FOR CLINICAL AND EXPERIMENTAL OPHTHALMOLOGY			English	Article						Artificial Intelligence (AI); ChatGPT; Gemini AI; Chatbots; Residents; Ophthalmology		IntroductionThe rapid advancement of artificial intelligence (AI), particularly in large language models like ChatGPT and Google's Gemini AI, marks a transformative era in technological innovation. This study explores the potential of AI in ophthalmology, focusing on the capabilities of ChatGPT and Gemini AI. While these models hold promise for medical education and clinical support, their integr…	[Bahir, Daniel; Nujeidat, Zaki] Tzafon Med Ctr, Dept Ophthalmol, Poriya, Israel; [Bahir, Daniel; Zur, Omri; Attal, Leah; Nujeidat, Zaki] Bar Ilan Univ, Azrieli Fac Med, Safed, Israel; [Knaanie, Ariela; Pikkel, Joseph; Plopsky, Gilad] Samson Assuta Ashdod Hosp, Dept Ophthalmol, Ashdod, Israel; [Pikkel, Joseph; Plopsky, Gilad] Bengurion Univ Negev, Fac Hlth Sci, Beer Sheva, Beer Sheva, Israel; [Mim…	Bar Ilan University; Ben Gurion University; Rambam Health Care Campus	Bahir, D (corresponding author), Tzafon Med Ctr, Dept Ophthalmol, Poriya, Israel.;Bahir, D (corresponding author), Bar Ilan Univ, Azrieli Fac Med, Safed, Israel.	bahirdaniel@gmail.com; zuromri@gmail.com; Leahar03@gmail.com; zaki.nujedat@gmail.com; oryoav@012.net.il; yossefp@assuta.co.il; michael@intername.co.il; giladip@walla.co.il	Mimouni, Michael/S-2916-2018; Pikkel, Joseph/AAZ-2107-2020	Bahir, Daniel/0000-0002-1232-6257; Attal, Leah/0009-0000-0166-0631					25	5	5	9	11	SPRINGER	NEW YORK	ONE NEW YORK PLAZA, SUITE 4600, NEW YORK, NY, UNITED STATES	0721-832X	1435-702X		GRAEF ARCH CLIN EXP	Graefes Arch. Clin. Exp. Ophthalmol.	FEB	2025	263	2
J	Huang, XQ; Raja, H; Madadi, Y; Delsoz, M; Poursoroush, A; Kahook, MY; Yousefi, S				Huang, Xiaoqin; Raja, Hina; Madadi, Yeganeh; Delsoz, Mohammad; Poursoroush, Asma; Kahook, Malik Y.; Yousefi, Siamak			Predicting Glaucoma Before Onset Using a Large Language Model Chatbot	AMERICAN JOURNAL OF OPHTHALMOLOGY			English	Article							OCULAR HYPERTENSION TREATMENT; OPEN-ANGLE GLAUCOMA; RISK-FACTORS	center dot PURPOSE: To investigate the capability of ChatGPT for forecasting the conversion from ocular hypertension (OHT) to glaucoma based on the Ocular Hypertension Treatment Study (OHTS). center dot DESIGN: Retrospective case-control study. center dot PARTICIPANTS: A total of 3008 eyes of 1504 subjects from the OHTS were included in the study. center dot METHODS: We selected demographic, clin…	[Huang, Xiaoqin; Raja, Hina; Madadi, Yeganeh; Delsoz, Mohammad; Yousefi, Siamak] Univ Tennessee, Hamilton Eye Inst, Hlth Sci Ctr, Dept Ophthalmol, Memphis, TN 37996 USA; [Poursoroush, Asma] Univ Memphis, Dept Biomed Engn, Memphis, TN USA; [Poursoroush, Asma] Univ Tennessee, Hlth Sci Ctr, Memphis, TN USA; [Kahook, Malik Y.] Univ Colorado, Sch Med, Dept Ophthalmol, Aurora, CO USA; [Yousefi, Siamak]…	University of Tennessee System; University of Tennessee Health Science Center; University of Memphis; University of Tennessee System; University of Tennessee Health Science Center; University of Colorado System; University of Colorado Anschutz Medical Campus; University of Tennessee System; University of Tennessee Health Science Center	Yousefi, S (corresponding author), Univ Tennessee, Hamilton Eye Inst, Hlth Sci Ctr, Dept Ophthalmol, Memphis, TN 37996 USA.	Siamak.Yousefi@uthsc.edu	Delsoz, Mohammad/IUP-1811-2023; Madadi, Yeganeh/JUV-2768-2023; Raja, hina/AAR-5423-2021	Raja, Hina/0000-0002-5268-047X; Delsoz, Mohammad/0000-0001-5638-2034; Yousefi, Siamak/0000-0001-8633-5730	NIH [R01EY033005]	NIH(United States Department of Health & Human ServicesNational Institutes of Health (NIH) - USA)	Funding/Support: This work was supported by NIH Grants R01EY033005 (SY) . Financial Disclosures: The sponsor had no role in the design or conduct of the research. All authors attest that they meet the current ICMJE criteria for authorship. The funder had no role in study design, data collection and analysis, decision to publish, or preparation of the manuscript. The authors have no conflict of in…		28	6	6	10	10	ELSEVIER SCIENCE INC	NEW YORK	STE 800, 230 PARK AVE, NEW YORK, NY 10169 USA	0002-9394	1879-1891		AM J OPHTHALMOL	Am. J. Ophthalmol.	OCT	2024	266
J	Assayag, E; Zadok, D; Berkovitz, L; Weill, Y				Assayag, Elishai; Zadok, David; Berkovitz, Liron; Weill, Yishay			Exploring the Accuracy and Readability of ChatGPT in Providing Information to Patients With Keratoconus	JOURNAL OF PEDIATRIC OPHTHALMOLOGY & STRABISMUS			English	Article								Patients with keratoconus may lack sufficient understanding of their illness. The authors assessed the accuracy and readability of ChatGPT (OpenAI) responses to common questions regarding keratoconus and found that the provided data are precise, with minor inaccuracies. The complexity of responses requires a high reading level, which may be unsuitable for many patients.	[Assayag, Elishai; Zadok, David; Berkovitz, Liron; Weill, Yishay] Hebrew Univ Jerusalem, Dept Ophthalmol, Shaare Zedek Med Ctr, Fac Med, Jerusalem, Israel	Hebrew University of Jerusalem; Shaare Zedek Medical Center	Assayag, E (corresponding author), Shaare Zedek Med Ctr, Dept Ophthalmol, Shmuel Bait St 12, IL-9103102 Jerusalem, Israel.	elishai.assayag@gmail.com	Assayag, Elishai/KBR-0602-2024	Zadok, David/0000-0002-6990-8004					7	0	0	0	0	SLACK INC	THOROFARE	6900 GROVE RD, THOROFARE, NJ 08086 USA	0191-3913	1938-2405		J PEDIAT OPHTH STRAB	J. Pediatr. Ophthalmol. Strabismus.	SEP-OCT	2024	61	5
J	Choi, JY; Han, E; Yoo, TK				Choi, Joon Yul; Han, Eoksoo; Yoo, Tae Keun			Application of ChatGPT-4 to oculomics: a cost-effective osteoporosis risk assessment to enhance management as a proof-of-principles model in 3PM	EPMA JOURNAL			English	Article						Predictive preventive personalized medicine (PPPM / 3PM); ChatGPT-4; Ophthalmology; Oculomics; Radiation-free screening tool; AI; Cost-effective holistic approach; Multi-level diagnostics; Personalized treatment strategies; Osteoporosis; Osteopenia; Individualized patient profile; Health risk assessment; Advanced healthcare	KOREA NATIONAL-HEALTH; BONE-MINERAL DENSITY; POPULATION; DIAGNOSIS; CATARACT; AGE; EYE	BackgroundOculomics is an emerging medical field that focuses on the study of the eye to detect and understand systemic diseases. ChatGPT-4 is a highly advanced AI model with multimodal capabilities, allowing it to process text and statistical data. Osteoporosis is a chronic condition presenting asymptomatically but leading to fractures if untreated. Current diagnostic methods like dual X-ray abs…	[Choi, Joon Yul] Yonsei Univ, Dept Biomed Engn, Wonju, South Korea; [Han, Eoksoo] Elect & Telecommun Res Inst ETRI, Daejeon, South Korea; [Yoo, Tae Keun] Hangil Eye Hosp, Dept Ophthalmol, 35 Bupyeong Daero, Incheon 21388, South Korea	Yonsei University; Electronics & Telecommunications Research Institute - Korea (ETRI)	Yoo, TK (corresponding author), Hangil Eye Hosp, Dept Ophthalmol, 35 Bupyeong Daero, Incheon 21388, South Korea.	eyetaekeunyoo@gmail.com	Yoo, Tae Keun/Q-3620-2019	Yoo, Tae Keun/0000-0003-0890-8614					50	1	1	11	12	SPRINGER INT PUBL AG	CHAM	GEWERBESTRASSE 11, CHAM, CH-6330, SWITZERLAND	1878-5077	1878-5085		EPMA J	EPMA J.	DEC	2024	15	4
J	Dihan, Q; Chauhan, MZ; Eleiwa, TK; Brown, AD; Hassan, AK; Khodeiry, MM; Elsheikh, RH; Oke, I; Nihalani, BR; VanderVeen, DK; Sallam, AB; Elhusseiny, AM				Dihan, Qais; Chauhan, Muhammad Z.; Eleiwa, Taher K.; Brown, Andrew D.; Hassan, Amr K.; Khodeiry, Mohamed M.; Elsheikh, Reem H.; Oke, Isdin; Nihalani, Bharti R.; VanderVeen, Deborah K.; Sallam, Ahmed B.; Elhusseiny, Abdelrahman M.			Large language models: a new frontier in paediatric cataract patient education	BRITISH JOURNAL OF OPHTHALMOLOGY			English	Article						Medical Education; Public health; Epidemiology; Child health (paediatrics)	CHILDHOOD; READABILITY; INFORMATION; QUALITY; HEALTH	Background/aims This was a cross-sectional comparative study. We evaluated the ability of three large language models (LLMs) (ChatGPT-3.5, ChatGPT-4, and Google Bard) to generate novel patient education materials (PEMs) and improve the readability of existing PEMs on paediatric cataract. Methods We compared LLMs' responses to three prompts. Prompt A requested they write a handout on paediatric ca…	[Dihan, Qais] Rosalind Franklin Univ Med & Sci, Chicago Med Sch, N Chicago, IL USA; [Dihan, Qais; Chauhan, Muhammad Z.; Elsheikh, Reem H.; Sallam, Ahmed B.; Elhusseiny, Abdelrahman M.] Univ Arkansas Med Sci, Dept Ophthalmol, Little Rock, AR 72205 USA; [Eleiwa, Taher K.] Benha Univ, Dept Ophthalmol, Banha, Egypt; [Brown, Andrew D.] Univ Arkansas Med Sci, Little Rock, AR USA; [Hassan, Amr K.] South…	Chicago Medical School; Rosalind Franklin University of Medicine & Science; University of Arkansas System; University of Arkansas Medical Sciences; Egyptian Knowledge Bank (EKB); Benha University; University of Arkansas System; University of Arkansas Medical Sciences; Egyptian Knowledge Bank (EKB); South Valley University Egypt; University of Kentucky; Harvard University; Harvard University Medic…	Elhusseiny, AM (corresponding author), Univ Arkansas Med Sci, Dept Ophthalmol, Little Rock, AR 72205 USA.;Elhusseiny, AM (corresponding author), Harvard Med Sch, Boston Childrens Hosp, Dept Ophthalmol, Boston, MA 02115 USA.	AMELhusseiny@uams.edu	Elhusseiny, Abdelrahman/J-8520-2019; Khodeiry, Mohamed/JXN-5508-2024; Hassan, Amr/LQJ-6401-2024; Oke, Isdin/HSH-0788-2023; Sallam, Ahmed Mohamed/AAI-8317-2020; Eleiwa, Taher/AAW-4546-2020	Dihan, Qais/0009-0005-1471-288X					35	3	3	6	8	BMJ PUBLISHING GROUP	LONDON	BRITISH MED ASSOC HOUSE, TAVISTOCK SQUARE, LONDON WC1H 9JR, ENGLAND	0007-1161	1468-2079		BRIT J OPHTHALMOL	Br. J. Ophthalmol.	AUG 1	2024	108	10
J	Aykut, A; Sezenoz, AS				Aykut, Aslan; Sezenoz, Almila Sarigul			Exploring the Potential of Code-Free Custom GPTs in Ophthalmology: An Early Analysis of GPT Store and User-Creator Guidance	OPHTHALMOLOGY AND THERAPY			English	Article						Artificial intelligence; ChatGPT; Custom GPT; Code-free; Large language models; Ophthalmology		IntroductionOpenAI recently introduced the ability to create custom generative pre-trained transformers (cGPTs) using text-based instruction and/or external documents using retrieval-augmented generation (RAG) architecture without coding knowledge. This study aimed to analyze the features of ophthalmology-related cGPTs and explore their potential utilities.MethodsData collection took place on Jan…	[Aykut, Aslan; Sezenoz, Almila Sarigul] Univ Michigan, Kellogg Eye Ctr, Dept Ophthalmol & Visual Sci, 1000 Wall St,Rm 641, Ann Arbor, MI 48105 USA; [Aykut, Aslan] Marmara Univ, Sch Med, Dept Ophthalmol, TR-34854 Istanbul, Turkiye; [Sezenoz, Almila Sarigul] Baskent Univ, Fac Med, Dept Ophthalmol, TR-06790 Ankara, Turkiye	University of Michigan System; University of Michigan; Marmara University; Baskent University	Aykut, A (corresponding author), Univ Michigan, Kellogg Eye Ctr, Dept Ophthalmol & Visual Sci, 1000 Wall St,Rm 641, Ann Arbor, MI 48105 USA.	aslanaykut81@gmail.com	Sarigul Sezenoz, Almila/AAJ-4860-2021; aykut, aslan/JXM-8808-2024	Sarigul Sezenoz, Almila/0000-0002-7030-5454; aykut, aslan/0000-0001-5426-1992					28	1	1	6	7	SPRINGER INT PUBL AG	CHAM	GEWERBESTRASSE 11, CHAM, CH-6330, SWITZERLAND	2193-8245	2193-6528		OPHTHALMOL THER	OPHTHALMOL. THER.	OCT	2024	13	10
J	Choi, JY; Yoo, TK				Choi, Joon Yul; Yoo, Tae Keun			Development of a novel scoring system for glaucoma risk based on demographic and laboratory factors using ChatGPT-4	MEDICAL & BIOLOGICAL ENGINEERING & COMPUTING			English	Article						Glaucoma; ChatGPT-4; Laboratory factors; Scoring system; Prediction	OPEN-ANGLE GLAUCOMA; POPULATION; HEALTH; CODE	We developed a scoring system for assessing glaucoma risk using demographic and laboratory factors by employing a no-code approach (automated coding) using ChatGPT-4. Comprehensive health checkup data were collected from the Korea National Health and Nutrition Examination Survey. Using ChatGPT-4, logistic regression was conducted to predict glaucoma without coding or manual numerical processes, a…	[Choi, Joon Yul] Yonsei Univ, Dept Biomed Engn, Wonju, South Korea; [Yoo, Tae Keun] Hangil Eye Hosp, Dept Ophthalmol, 35 Bupyeong Daero, Incheon 21388, South Korea	Yonsei University	Yoo, TK (corresponding author), Hangil Eye Hosp, Dept Ophthalmol, 35 Bupyeong Daero, Incheon 21388, South Korea.	eyetaekeunyoo@gmail.com	Yoo, Tae Keun/Q-3620-2019	Yoo, Tae Keun/0000-0003-0890-8614					37	2	2	7	9	SPRINGER HEIDELBERG	HEIDELBERG	TIERGARTENSTRASSE 17, D-69121 HEIDELBERG, GERMANY	0140-0118	1741-0444		MED BIOL ENG COMPUT	Med. Biol. Eng. Comput.	JAN	2025	63	1
J	Alqudah, AA; Aleshawi, AJ; Baker, M; Alnajjar, Z; Ayasrah, I; Ta'ani, Y; Al Salkhadi, M; Aljawarneh, S				Alqudah, Asem A.; Aleshawi, Abdelwahab J.; Baker, Mohammed; Alnajjar, Zaina; Ayasrah, Ibrahim; Ta'ani, Yaqoot; Al Salkhadi, Mohammad; Aljawarneh, Shaima'a			Evaluating accuracy and reproducibility of ChatGPT responses to patient-based questions in Ophthalmology: An observational study	MEDICINE			English	Article						artificial intelligence; ChatGPT; glaucoma; ophthalmology	HEALTH LITERACY	Chat Generative Pre-Trained Transformer (ChatGPT) is an online large language model that appears to be a popular source of health information, as it can provide patients with answers in the form of human-like text, although the accuracy and safety of its responses are not evident. This study aims to evaluate the accuracy and reproducibility of ChatGPT responses to patients-based questions in opht…	[Alqudah, Asem A.; Aleshawi, Abdelwahab J.; Baker, Mohammed; Ayasrah, Ibrahim; Ta'ani, Yaqoot; Al Salkhadi, Mohammad; Aljawarneh, Shaima'a] Jordan Univ Sci & Technol JUST, Fac Med, Irbid, Jordan; [Alnajjar, Zaina] Hashemite Univ, Fac Med, Zarqa, Jordan	Jordan University of Science & Technology; Hashemite University	Alqudah, AA (corresponding author), Jordan Univ Sci & Technol, Fac Med, Dept Special Surg, Ophthalmol Div, POB 3030, Irbid 22110, Jordan.	asemq981@yahoo.com; abdelwahhabjamal@yahoo.com; mbbaker19@med.just.edu.jo; zainaalnajjar670@gmail.com; Isayasrah188@med.just.edu.jo; yataani19@med.just.edu.jo; maalsalkhadi19@med.just.edu.jo; sjaljawarneh19@med.just.edu.jo	Alnajjar, Zaina/KHD-5969-2024	Aleshawi, Abdelwahab/0000-0001-6129-475X; Al Salkhadi, Mohammad Ajwad/0009-0007-7818-8620; Alqudah, Asem/0000-0002-8321-2572					19	0	0	3	6	LIPPINCOTT WILLIAMS & WILKINS	PHILADELPHIA	TWO COMMERCE SQ, 2001 MARKET ST, PHILADELPHIA, PA 19103 USA	0025-7974	1536-5964		MEDICINE	Medicine (Baltimore)	AUG 9	2024	103	32
J	Moshirfar, M; Moin, KA; Omidvarnia, S; Moulton, SD; Willey, PB; Stoakes, IM; Hoopes, PC				Moshirfar, Majid; Moin, Kayvon A.; Omidvarnia, Soroush; Moulton, Spencer D.; Willey, Preston B.; Stoakes, Isabella M.; Hoopes, Phillip C.			LASIK Versus PRK Based on Increased Risk of Corneal Haze: Assessing Current Decision-Making Capabilities of Six Artificial Intelligence Models in Refractive Surgery	JOURNAL OF REFRACTIVE SURGERY			English	Article							PHOTOREFRACTIVE KERATECTOMY; FLAP LIFT; KERATOMILEUSIS; TEARS	PURPOSE: To investigate the current decision-making capabilities of 6 different artificial intelligence (AI) models by assessing their refractive surgery recommendations (laser in-situ keratomileusis [LASIK] or photorefractive keratectomy [PRK]) for a theoretical patient with a history of keloid formation. METHODS: Claude-2 (Anthropic, 2023), GPT-4 (OpenAI, 2023), GPT-3.5 (OpenAI, 2022), Gemini 1…	[Moshirfar, Majid; Moin, Kayvon A.; Stoakes, Isabella M.; Hoopes, Phillip C.] Hoopes Vis, Hoopes Vis Res Ctr, Draper, UT USA; [Moshirfar, Majid] Univ Utah, Sch Med, John A Moran Eye Ctr, Salt Lake City, UT USA; [Moshirfar, Majid] Utah Lions Eye Bank, Murray, UT USA; [Omidvarnia, Soroush] Texas Tech Univ, Hlth Ctr, El Paso, TX, Mexico; [Moulton, Spencer D.] Idaho Coll Osteopath Med, Meridian, ID U…	Utah System of Higher Education; University of Utah; Brigham Young University	Moshirfar, M (corresponding author), Hoopes Vis Res Ctr, 11820 S State St 200, Draper, UT 84020 USA.	nea2020@me.com	Moshirfar, Majid/AAG-8845-2021						20	0	0	6	6	SLACK INC	THOROFARE	6900 GROVE RD, THOROFARE, NJ 08086 USA	1081-597X	1938-2391		J REFRACT SURG	J. Refractive Surg.	AUG	2024	40	8
J	Sensoy, E; Citirik, M				Sensoy, Eyupcan; Citirik, Mehmet			Evaluation of Current Artificial Intelligence Programs on the Knowledge of Glaucoma	KLINISCHE MONATSBLATTER FUR AUGENHEILKUNDE			English	Article						artificial intelligence applications; Bard; Bing; ChatGPT; glaucoma		Background To measure the success of three different artificial intelligence chatbots, ChatGPT, Bard, and Bing, in correctly answering questions about glaucoma types and treatment modalities and to examine their superiority over each other. Materials and Methods Thirty-two questions about glaucoma types and treatment modalities were asked using the ChatGPT, Bard, and Bing chatbots. The correct an…	[Sensoy, Eyupcan; Citirik, Mehmet] Ankara City Hosp Varlik Mahallesi, Ophthalmol, HalilSezai Erkut Caddesi, TR-060000 Yenimahalle, Ankara, Turkiye		Sensoy, E (corresponding author), Ankara City Hosp Varlik Mahallesi, Ophthalmol, HalilSezai Erkut Caddesi, TR-060000 Yenimahalle, Ankara, Turkiye.	dreyupcansensoy@yahoo.com	CITIRIK, MEHMET/A-1694-2018						17	0	0	2	3	GEORG THIEME VERLAG KG	STUTTGART	Oswald-Hesse-Strasse 50, D-70469 STUTTGART, GERMANY	0023-2165	1439-3999		KLIN MONATSBL AUGENH	Klinische Monatsblat. Augenheilkunde	OCT	2024	241	10
J	Li, JJ; Guan, ZY; Wang, J; Cheung, CY; Zheng, YF; Lim, LL; Lim, CC; Ruamviboonsuk, P; Raman, R; Corsino, L; Echouffo-Tcheugui, JB; Luk, AOY; Chen, LJ; Sun, XD; Hamzah, H; Wu, Q; Wang, XN; Liu, RH; Wang, YX; Chen, TL; Zhang, X; Yang, XL; Yin, J; Wan, J; Du, W; Quek, T; Goh, JHL; Yang, DW; Hu, XY; Nguyen, TX; Szeto, SKH; Chotcomwongse, P; Malek, R; Normatova, N; Ibragimova, N; Srinivasan, R; Zhong,…				Li, Jiajia; Guan, Zhouyu; Wang, Jing; Cheung, Carol Y.; Zheng, Yingfeng; Lim, Lee-Ling; Lim, Cynthia Ciwei; Ruamviboonsuk, Paisan; Raman, Rajiv; Corsino, Leonor; Echouffo-Tcheugui, Justin B.; Luk, Andrea O. Y.; Chen, Li Jia; Sun, Xiaodong; Hamzah, Haslina; Wu, Qiang; Wang, Xiangning; Liu, Ruhan; Wang, Ya Xing; Chen, Tingli; Zhang, Xiao; Yang, Xiaolong; Yin, Jun; Wan, Jing; Du, Wei; Quek, Ten Chee…			Integrated image-based deep learning and language models for primary diabetes care	NATURE MEDICINE			English	Article							MAJOR RISK-FACTORS; SCREENING-PROGRAM; GLOBAL PREVALENCE; EYE DISEASES; RETINOPATHY; EPIDEMIOLOGY; TELEMEDICINE; VALIDATION; CHATGPT	Primary diabetes care and diabetic retinopathy (DR) screening persist as major public health challenges due to a shortage of trained primary care physicians (PCPs), particularly in low-resource settings. Here, to bridge the gaps, we developed an integrated image-language system (DeepDR-LLM), combining a large language model (LLM module) and image-based deep learning (DeepDR-Transformer), to provi…	[Li, Jiajia; Guan, Zhouyu; Liu, Ruhan; Yin, Jun; Wu, Liang; Li, Tingyao; Cheng, Di; Wang, Zheyuan; Qin, Yiming; Dai, Ling; Meng, Ziyao; Shu, Jia; Lu, Yuwei; Jiang, Nan; Hu, Tingting; Huang, Shan; Huang, Gengyou; Yu, Shujie; Liu, Dan; Guo, Minyi; Bao, Yuqian; Jia, Weiping; Li, Huating; Sheng, Bin] Shanghai Jiao Tong Univ, Sch Med,Dept Endocrinol & Metab,Shanghai Peoples, Shanghai Diabet Inst,Dept …	Shanghai Jiao Tong University; Shanghai Jiao Tong University; Chinese University of Hong Kong; Sun Yat Sen University; Universiti Malaya; Singapore General Hospital; Rajavithi Hospital; Rangsit University; Duke University; Duke University; Johns Hopkins University; Chinese University of Hong Kong; Prince of Wales Hospital; Chinese University of Hong Kong; Chinese University of Hong Kong; Shanghai…	Jia, WP; Li, HT; Sheng, B (corresponding author), Shanghai Jiao Tong Univ, Sch Med,Dept Endocrinol & Metab,Shanghai Peoples, Shanghai Diabet Inst,Dept Comp Sci & Engn,Sch Ele, Shanghai Clin Ctr Diabet,Shanghai Belt & Rd Int J, Shanghai, Peoples R China.;Tham, YC (corresponding author), Natl Univ Singapore, Ctr Innovat & Precis Eye Hlth, Yong Loo Lin Sch Med, Singapore, Singapore.;Tham, YC (corres…	wpjia@sjtu.edu.cn; thamyc@nus.edu.sg; huarting99@sjtu.edu.cn; shengbin@sjtu.edu.cn; wongtienyin@tsinghua.edu.cn	abdullah, adina/E-1052-2014; Szeto, Simon/HMD-2901-2023; li, jiajia/AAX-9386-2020; Guan, Zhouyu/JFS-9545-2023; Guan, Xinping/U-1405-2017; Liu, Ruhan/IQS-3912-2023; Sivaprasad, S./D-6876-2015; Hee, Nicholas/MSX-8228-2025; Sheng, Bin/LMO-9532-2024; Tham, Yih Chung/IUP-0091-2023; Chan, Juliana/B-7918-2016; Lim, Lee-Ling/D-7697-2015; Wong, Tien/AAC-9724-2020; 刘, 丹/HTS-9603-2023; Keane, Pearse/AAE-570…	Keane, Pearse/0000-0002-9239-745X; WANG, JING/0000-0002-7756-706X; Sivaprasad, Sobha/0000-0001-8952-0659	the National Key Research and Development Program of China (2022YFC2502800), and the National Natural Science Foundation of China (8238810007) [104443]; Artificial Intelligence Institute at Shanghai Jiao Tong University [2022YFC2502800]; National Key R&D Program of China; National Natural Science Fund of China [82388101]; Beijing Natural Science Foundation [IS23096]; National Key Research and Dev…	the National Key Research and Development Program of China (2022YFC2502800), and the National Natural Science Foundation of China (8238810007)(National Natural Science Foundation of China (NSFC)); Artificial Intelligence Institute at Shanghai Jiao Tong University; National Key R&D Program of China; National Natural Science Fund of China(National Natural Science Foundation of China (NSFC)); Beijin…	We thank all the investigators and study participants for this study. We thank C. Cai and Y. Liu for the fruitful discussions. Additionally, we thank R. Han from Shanghai Sixth People's Hospital, Y. Huang from Huadong Sanatorium, K. Dong from Tongji Hospital affiliated to Tongji Medical College of Huazhong University of Science & Technology, Y. He from First Affiliated Hospital of Xi'an Jiaotong …		65	16	16	58	100	NATURE PORTFOLIO	BERLIN	HEIDELBERGER PLATZ 3, BERLIN, 14197, GERMANY	1078-8956	1546-170X		NAT MED	Nat. Med.	OCT	2024	30	10
J	Shi, RH; Liu, SV; Xu, XW; Ye, ZQ; Yang, J; Le, QH; Qiu, JN; Tian, LJ; Wei, AJ; Shan, K; Zhao, C; Sun, XH; Zhou, XT; Hong, JX				Shi, Runhan; Liu, Steven; Xu, Xinwei; Ye, Zhengqiang; Yang, Jin; Le, Qihua; Qiu, Jini; Tian, Lijia; Wei, Anji; Shan, Kun; Zhao, Chen; Sun, Xinghuai; Zhou, Xingtao; Hong, Jiaxu			Benchmarking four large language models' performance of addressing Chinese patients' inquiries about dry eye disease: A two-phase study	HELIYON			English	Article						Large language model; Ophthalmology; Dry eye disease; Patient education; Real world interview		Purpose: To evaluate the performance of four large language models (LLMs)-GPT-4, PaLM 2, Qwen, and Baichuan 2-in generating responses to inquiries from Chinese patients about dry eye disease (DED). Design: Two-phase study, including a cross-sectional test in the first phase and a real-world clinical assessment in the second phase. Subjects: Eight board-certified ophthalmologists and 46 patients w…	[Shi, Runhan; Ye, Zhengqiang; Yang, Jin; Le, Qihua; Qiu, Jini; Tian, Lijia; Wei, Anji; Shan, Kun; Zhao, Chen; Sun, Xinghuai; Zhou, Xingtao; Hong, Jiaxu] Fudan Univ, Dept Ophthalmol & Vis Sci, State Key Lab Mol Engn Polymerse, Shanghai 200031, Peoples R China; [Shi, Runhan; Hong, Jiaxu] Fudan Univ, NHC Key Lab Mol Engn polymers, Shanghai 200031, Peoples R China; [Shi, Runhan; Hong, Jiaxu] Shanghai…	Fudan University; Fudan University; Fudan University; University of Illinois System; University of Illinois Urbana-Champaign; University of Hong Kong	Hong, JX (corresponding author), Fudan Univ, Dept Ophthalmol & Vis Sci, State Key Lab Mol Engn Polymerse, Shanghai 200031, Peoples R China.	jiaxu.hong@fdeent.org	Tian, Lijia/GZM-3452-2022; Hong, Jiaxu/C-5107-2012; Shi, Runhan/ITV-0630-2023						28	0	0	16	17	CELL PRESS	CAMBRIDGE	50 HAMPSHIRE ST, FLOOR 5, CAMBRIDGE, MA 02139 USA		2405-8440		HELIYON	Heliyon	JUL 30	2024	10	14
J	Tan, DNH; Tham, YC; Koh, V; Loon, SC; Aquino, MC; Lun, K; Cheng, CY; Ngiam, KY; Tan, M				Tan, Darren Ngiap Hao; Tham, Yih-Chung; Koh, Victor; Loon, Seng Chee; Aquino, Maria Cecilia; Lun, Katherine; Cheng, Ching-Yu; Ngiam, Kee Yuan; Tan, Marcus			Evaluating Chatbot responses to patient questions in the field of glaucoma	FRONTIERS IN MEDICINE			English	Article						glaucoma; large language models; ChatGPT; artificial intelligence; patient education		Objective The aim of this study was to evaluate the accuracy, comprehensiveness, and safety of a publicly available large language model (LLM)-ChatGPT in the sub-domain of glaucoma.Design Evaluation of diagnostic test or technology.Subjects, participants, and/or controls We seek to evaluate the responses of an artificial intelligence chatbot ChatGPT (version GPT-3.5, OpenAI).Methods, intervention…	[Tan, Darren Ngiap Hao; Koh, Victor; Loon, Seng Chee; Aquino, Maria Cecilia; Lun, Katherine; Tan, Marcus] Natl Univ Hosp, Dept Ophthalmol, Singapore City, Singapore; [Tham, Yih-Chung; Cheng, Ching-Yu] Natl Univ Singapore, Ctr Innovat & Precis Eye Hlth, Yong Loo Lin Sch Med, Dept Ophthalmol, Singapore City, Singapore; [Tham, Yih-Chung; Cheng, Ching-Yu] Natl Univ Hlth Syst, Singapore City, Singapor…	National University of Singapore; National University of Singapore; Singapore National Eye Center; National University of Singapore	Tan, M (corresponding author), Natl Univ Hosp, Dept Ophthalmol, Singapore City, Singapore.	ophcjmt@nus.edu.sg	Ngiam, Kee/S-5501-2017; Cheng, Ching-Yu/Y-2229-2019; Tham, Yih Chung/IUP-0091-2023	Tan, Darren Ngiap Hao/0000-0003-4429-8315					18	0	0	3	4	FRONTIERS MEDIA SA	LAUSANNE	AVENUE DU TRIBUNAL FEDERAL 34, LAUSANNE, CH-1015, SWITZERLAND		2296-858X		FRONT MED-LAUSANNE	Front. Med.	JUL 9	2024	11
J	Kerci, SG; Sahan, B				Kerci, Suleyman G.; Sahan, Berna			An Analysis of ChatGPT4 to Respond to Glaucoma-Related Questions	JOURNAL OF GLAUCOMA			English	Article						artificial intelligence; ChatGPT; glaucoma		Pr & eacute;cis:In recent years, ChatGPT has been widely used as a source of information. In our study, it was revealed that ChatGPT gives accurate information about glaucoma.Purpose:We examined the knowledge of ChatGPT about glaucoma.Materials and Methods:Frequently asked questions about glaucoma found on websites of ophthalmology associations and hospitals, and social media applications were as…	[Kerci, Suleyman G.; Sahan, Berna] Medicana Int Izmir Hosp, Dept Ophthalmol, Izmir, Turkiye		Kerci, SG (corresponding author), Isciler St 126, TR-35170 Izmir, Turkiye.	gokhankerci@yahoo.com; bernasahan@yahoo.com	KERCİ, Süleyman gökhan/JDX-0053-2023						17	3	3	0	1	LIPPINCOTT WILLIAMS & WILKINS	PHILADELPHIA	TWO COMMERCE SQ, 2001 MARKET ST, PHILADELPHIA, PA 19103 USA	1057-0829	1536-481X		J GLAUCOMA	J. Glaucoma	JUL	2024	33	7
J	Muntean, GA; Marginean, A; Groza, A; Damian, I; Roman, SA; Hapca, MC; Sere, AM; Manoiu, RM; Muntean, MV; Nicoara, SD				Muntean, George Adrian; Marginean, Anca; Groza, Adrian; Damian, Ioana; Roman, Sara Alexia; Hapca, Madalina Claudia; Sere, Anca Madalina; Manoiu, Roxana Mihaela; Muntean, Maximilian Vlad; Nicoara, Simona Delia			A Qualitative Evaluation of ChatGPT4 and PaLM2's Response to Patient's Questions Regarding Age-Related Macular Degeneration	DIAGNOSTICS			English	Article						ChatGPT4; large language model; age-related macular degeneration; question; qualitative evaluation		Patient compliance in chronic illnesses is essential for disease management. This also applies to age-related macular degeneration (AMD), a chronic acquired retinal degeneration that needs constant monitoring and patient cooperation. Therefore, patients with AMD can benefit by being properly informed about their disease, regardless of the condition's stage. Information is essential in keeping the…	[Muntean, George Adrian; Damian, Ioana; Hapca, Madalina Claudia; Sere, Anca Madalina; Nicoara, Simona Delia] Iuliu Hatieganu Univ Med & Pharm, Emergency Cty Hosp, Dept Ophthalmol, Cluj Napoca 400347, Romania; [Marginean, Anca; Groza, Adrian] Tech Univ Cluj Napoca, Dept Comp Sci, Cluj Napoca 400114, Romania; [Roman, Sara Alexia] Iuliu Hatieganu Univ Med & Pharm, Fac Med, Cluj Napoca 400347, Romani…	Iuliu Hatieganu University of Medicine & Pharmacy; Technical University of Cluj Napoca; Iuliu Hatieganu University of Medicine & Pharmacy; Oncology Institute Prof. Dr. Ion Chiricuta	Muntean, GA (corresponding author), Iuliu Hatieganu Univ Med & Pharm, Emergency Cty Hosp, Dept Ophthalmol, Cluj Napoca 400347, Romania.	georgemuntean99@gmail.com; anca.marginean@cs.utcluj.ro; adrian.groza@cs.utcluj.ro; ioana.damian@umfcluj.ro; roman.sara.alexia@elearn.umfcluj.ro; madalina.prodan06@gmail.com; anca.mada.sere@elearn.umfcluj.ro; roxanamanoiu90@yahoo.com; maximilian.muntean@iocn.ro; stalu@umfcluj.ro	Damian, Ioana/AAO-8727-2021; Groza, Adrian/D-6401-2011; Sere, Anca/LLM-2639-2024; Marginean, Anca/AAF-7142-2021; Muntean, George/HJG-9509-2022; Muntean, Maximilian/HJP-8255-2023; Hapca, Madalina/IAM-1146-2023; Nicoara, Simona Delia/D-3353-2016	Nicoara, Simona Delia/0000-0002-7886-2044; Muntean, Maximilian/0000-0003-0709-8779; Sere, Anca Madalina/0009-0005-7020-8493; Marginean, Anca Nicoleta/0000-0001-8426-588X	Executive Agency for Higher Education, Research, Development and Innovation Funding (UEFISCDI) [PN-III-P2-2.1-PED-2021-2709]	Executive Agency for Higher Education, Research, Development and Innovation Funding (UEFISCDI)(Consiliul National al Cercetarii Stiintifice (CNCS)Unitatea Executiva pentru Finantarea Invatamantului Superior, a Cercetarii, Dezvoltarii si Inovarii (UEFISCDI))	This work was supported by the the Executive Agency for Higher Education, Research, Development and Innovation Funding (UEFISCDI)-grant number PN-III-P2-2.1-PED-2021-2709.		14	0	0	1	1	MDPI	BASEL	ST ALBAN-ANLAGE 66, CH-4052 BASEL, SWITZERLAND		2075-4418		DIAGNOSTICS	Diagnostics	JUL	2024	14	14
J	Subramanian, B; Rajalakshmi, R; Sivaprasad, S; Rao, C; Raman, R				Subramanian, Brughanya; Rajalakshmi, Ramachandran; Sivaprasad, Sobha; Rao, Chetan; Raman, Rajiv			Assessing the appropriateness and completeness of ChatGPT-4's AI-generated responses for queries related to diabetic retinopathy	INDIAN JOURNAL OF OPHTHALMOLOGY			English	Article						Artificial intelligence; chatbots; ChatGPT; diabetic retinopathy; natural language processing	PREVALENCE	Objective:To evaluate the appropriateness of responses generated by an online chat-based artificial intelligence (AI) model for diabetic retinopathy (DR) related questions.Design:Cross-sectional study.Methods:A set of 20 questions framed from the patient's perspective addressing DR-related queries, such as the definition of disease, symptoms, prevention methods, treatment options, diagnostic meth…	[Subramanian, Brughanya; Rao, Chetan; Raman, Rajiv] SankaraNethralaya, Shri Bhagwan Mahavir Vitreoretinal Serv, Dept Ophthalmol, Chennai, Tamil Nadu, India; [Rajalakshmi, Ramachandran] Dr Mohans Diabet Special Ctr, Dept Ophthalmol, Chennai, Tamil Nadu, India; [Rajalakshmi, Ramachandran] Madras Diabet Res Fdn, Chennai, Tamil Nadu, India; [Sivaprasad, Sobha] Moorfields Eye Hosp NHS Fdn Trust, NIHR …	Madras Diabetes Research Foundation; University of London; University College London; Moorfields Eye Hospital NHS Foundation Trust	Raman, R (corresponding author), Sankara Nethralaya, Shri Bhagwan Mahavir Vitreoretinal Serv, Chennai, Tamil Nadu, India.	rajivpgraman@gmail.com	Sivaprasad, S./D-6876-2015	Sivaprasad, Sobha/0000-0001-8952-0659					21	1	1	2	3	WOLTERS KLUWER MEDKNOW PUBLICATIONS	MUMBAI	WOLTERS KLUWER INDIA PVT LTD , A-202, 2ND FLR, QUBE, C T S NO 1498A-2 VILLAGE MAROL, ANDHERI EAST, MUMBAI, Maharashtra, INDIA	0301-4738	1998-3689		INDIAN J OPHTHALMOL	Indian J. Ophthalmol.	JUL	2024	72	SUPPL 4
J	Wu, JH; Nishida, T; Moghimi, S; Weinreb, RN				Wu, Jo-Hsuan; Nishida, Takashi; Moghimi, Sasan; Weinreb, Robert N.			Performance of ChatGPT on Responding to Common Online Questions Regarding Key Information Gaps in Glaucoma	JOURNAL OF GLAUCOMA			English	Article						glaucoma; large language models; ChatGPT; GPT-4; artificial intelligence			[Wu, Jo-Hsuan; Nishida, Takashi; Moghimi, Sasan; Weinreb, Robert N.] Univ Calif San Diego, Shiley Eye Inst, Hamilton Glaucoma Ctr, Viterbi Family Dept Ophthalmol, La Jolla, CA USA	University of California System; University of California San Diego	Nishida, T (corresponding author), Univ Calif San Diego, Shiley Eye Inst, 9415 Campus Point Dr, La Jolla, CA 92093 USA.	uuuuuu1swu@gmail.comjow009@health.ucsd.edu; tnishida@health.ucsd.edu; sasanimii@gmail.com; rweinreb@ucsd.edu	NISHIDA, TAKASHI/ABC-7887-2021; Wu, Jo-Hsuan/AAK-8899-2021	Wu, Jo-Hsuan/0000-0002-9435-746X; Nishida, Takashi/0000-0002-8312-6623	National Institutes of Health/National Eye Institute Grants [P30EY022589, R01MD014850, R01EY029058, R01EY034148]; University of California Tobacco Related Disease Research Program [T31IP1511]; Research to Prevent Blindness (New York, NY)	National Institutes of Health/National Eye Institute Grants(United States Department of Health & Human ServicesNational Institutes of Health (NIH) - USANIH National Eye Institute (NEI)); University of California Tobacco Related Disease Research Program(University of California System); Research to Prevent Blindness (New York, NY)(Research to Prevent Blindness (RPB))	Supported by National Institutes of Health/National Eye Institute Grants (P30EY022589, R01MD014850, R01EY029058, R01EY034148), University of California Tobacco Related Disease Research Program (T31IP1511), and an unrestricted grant from Research to Prevent Blindness (New York, NY). The sponsor or funding organization had no role in the design or conduct of this research.		12	3	3	4	4	LIPPINCOTT WILLIAMS & WILKINS	PHILADELPHIA	TWO COMMERCE SQ, 2001 MARKET ST, PHILADELPHIA, PA 19103 USA	1057-0829	1536-481X		J GLAUCOMA	J. Glaucoma	JUL	2024	33	7
J	Antaki, F; Chopra, R; Keane, PA				Antaki, Fares; Chopra, Reena; Keane, Pearse A.			Vision-Language Models for Feature Detection of Macular Diseases on Optical Coherence Tomography	JAMA OPHTHALMOLOGY			English	Article								Importance Vision-language models (VLMs) are a novel artificial intelligence technology capable of processing image and text inputs. While demonstrating strong generalist capabilities, their performance in ophthalmology has not been extensively studied. Objective To assess the performance of the Gemini Pro VLM in expert-level tasks for macular diseases from optical coherence tomography (OCT) scan…	[Antaki, Fares; Chopra, Reena; Keane, Pearse A.] UCL, Inst Ophthalmol, 11-43 Bath St, London EC1V 9EL, England; [Antaki, Fares; Chopra, Reena; Keane, Pearse A.] Moorfields Eye Hosp Natl Hlth Serv Fdn Trust, London, England; [Antaki, Fares] Ctr Hosp Univ Montreal, Sch Artificial Intelligence Healthcare, Montreal, PQ, Canada; [Chopra, Reena; Keane, Pearse A.] Moorfields Eye Hosp Natl Hlth Serv Fdn …	University of London; University College London; University of London; University College London; Moorfields Eye Hospital NHS Foundation Trust; Universite de Montreal; University of London; University College London; Moorfields Eye Hospital NHS Foundation Trust	Keane, PA (corresponding author), UCL, Inst Ophthalmol, 11-43 Bath St, London EC1V 9EL, England.	p.keane@ucl.ac.uk	Keane, Pearse/AAE-5709-2019; Chopra, Reena/JLK-9488-2023; Antaki, Fares/GSI-6622-2022	Keane, Pearse/0000-0002-9239-745X					11	9	9	6	9	AMER MEDICAL ASSOC	CHICAGO	330 N WABASH AVE, STE 39300, CHICAGO, IL 60611-5885 USA	2168-6165	2168-6173		JAMA OPHTHALMOL	JAMA Ophthalmol.	JUN	2024	142	6
J	Maywood, MJ; Parikh, R; Deobhakta, A; Begaj, T				Maywood, Michael J.; Parikh, Ravi; Deobhakta, Avnish; Begaj, Tedi			PERFORMANCE ASSESSMENT OF AN ARTIFICIAL INTELLIGENCE CHATBOT IN CLINICAL VITREORETINAL SCENARIOS	RETINA-THE JOURNAL OF RETINAL AND VITREOUS DISEASES			English	Article						artificial intelligence; chatbot; ChatGPT; ophthalmology; retina		Supplemental Digital Content is Available in the Text.In this retrospective cross-sectional study, ChatGPT answered 83% of clinical vitreoretinal scenarios correctly and 52.5% of scenarios comprehensively. ChatGPT is a powerful source of information but must be used with caution given its limitations in providing comprehensive clinical management decisions. Purpose:To determine how often ChatGPT …	[Maywood, Michael J.; Begaj, Tedi] Corewell Hlth William Beaumont Univ Hosp, Dept Ophthalmol, Royal Oak, MI USA; [Parikh, Ravi] Manhattan Retina & Eye Consultants, New York, NY USA; [Parikh, Ravi] NYU, Sch Med, Dept Ophthalmol, New York, NY USA; [Deobhakta, Avnish] Icahn Sch Med Mt Sinai, New York, NY USA; [Begaj, Tedi] Associated Retinal Consultants, 3555 West Thirteen Mile Rd,Suite LL-20, Royal…	New York University; Icahn School of Medicine at Mount Sinai	Begaj, T (corresponding author), Associated Retinal Consultants, 3555 West Thirteen Mile Rd,Suite LL-20, Royal Oak, MI 48073 USA.	mikemaywood1@gmail.com; rparikh815@gmail.com; avnishd@gmail.com; tbegaj@arcpc.net	Begaj, Tedi/AFQ-1992-2022	Maywood, Michael/0009-0006-1917-7940					16	4	4	1	2	LIPPINCOTT WILLIAMS & WILKINS	PHILADELPHIA	TWO COMMERCE SQ, 2001 MARKET ST, PHILADELPHIA, PA 19103 USA	0275-004X	1539-2864		RETINA-J RET VIT DIS	Retin.-J. Retin. Vitr. Dis.	JUN	2024	44	6
J	Wang, S; Kim, B; Kang, J; Eom, DS				Wang, Soohyun; Kim, Byoungkug; Kang, Jiheon; Eom, Doo-Seop			Precision Diagnosis of Glaucoma with VLLM Ensemble Deep Learning	APPLIED SCIENCES-BASEL			English	Article						glaucoma classification; computer aided diagnosis; deep learning; medical image analysis; data imbalance; VROI; ROI; color palette; vision large language model		This paper focuses on improving automated approaches to glaucoma diagnosis, a severe disease that leads to gradually narrowing vision and potentially blindness due to optic nerve damage occurring without the patient's awareness. Early diagnosis is crucial. By utilizing advanced deep learning technologies and robust image processing capabilities, this study employed four types of input data (retin…	[Wang, Soohyun; Eom, Doo-Seop] Korea Univ, Dept Elect & Comp Engn, 145 Anam Ro, Seoul 02841, South Korea; [Kim, Byoungkug] Sahmyook Univ, Div Comp Sci & Engn, 815 Hwarang Ro, Seoul 01795, South Korea; [Kang, Jiheon] Duksung Womens Univ, Dept Software, 33 Samyang Ro, Seoul 01369, South Korea	Korea University; Sahmyook University; Duksung Women's University	Eom, DS (corresponding author), Korea Univ, Dept Elect & Comp Engn, 145 Anam Ro, Seoul 02841, South Korea.	08shwang@korea.ac.kr; dearbk@syu.ac.kr; jhkang@duksung.ac.kr; eomds@korea.ac.kr		Kim, Byoung-Kug/0009-0004-2285-1460; Wang, SooHyun/0000-0001-5483-4113					44	1	1	4	8	MDPI	BASEL	ST ALBAN-ANLAGE 66, CH-4052 BASEL, SWITZERLAND		2076-3417		APPL SCI-BASEL	Appl. Sci.-Basel	JUN	2024	14	11
J	Yaïci, R; Cieplucha, M; Bock, R; Moayed, F; Bechrakis, NE; Berens, P; Feltgen, N; Friedburg, D; Gräf, M; Guthoff, R; Hoffmann, EM; Hoerauf, H; Hintschich, C; Kohnen, T; Messmer, EM; Nentwich, MM; Pleyer, U; Schaudig, U; Seitz, B; Geerling, G; Roth, M				Yaici, Remi; Cieplucha, M.; Bock, R.; Moayed, F.; Bechrakis, N. E.; Berens, P.; Feltgen, N.; Friedburg, D.; Graef, M.; Guthoff, R.; Hoffmann, E. M.; Hoerauf, H.; Hintschich, C.; Kohnen, T.; Messmer, E. M.; Nentwich, M. M.; Pleyer, U.; Schaudig, U.; Seitz, B.; Geerling, G.; Roth, M.			ChatGPT and the German board examination for ophthalmology: an evaluation	OPHTHALMOLOGIE			German	Article						Artificial intelligence; Medicine; Open questions; Subspeciality; Large Language Model	ARTIFICIAL-INTELLIGENCE	Purpose In recent years artificial intelligence (AI), as a new segment of computer science, has also become increasingly more important in medicine. The aim of this project was to investigate whether the current version of ChatGPT (ChatGPT 4.0) is able to answer open questions that could be asked in the context of a German board examination in ophthalmology. Methods After excluding image-based qu…	[Yaici, Remi; Cieplucha, M.; Bock, R.; Moayed, F.; Guthoff, R.; Geerling, G.; Roth, M.] Heinrich Heine Univ Dusseldorf, Med Fak, Klin Augenheilkunde, Univ Klinikum Dusseldorf, Moorenstr 5, D-40225 Dusseldorf, Germany; [Bechrakis, N. E.] Univ Klinikum Essen, Augenklin, Essen, Germany; [Berens, P.] Hertie Inst AI Brain Hlth Hertie AI, Tubingen, Germany; [Feltgen, N.] Univ Spital Basel, Augenklin, B…	Heinrich Heine University Dusseldorf; Heinrich Heine University Dusseldorf Hospital; University of Duisburg Essen; University of Basel; University Hospital of Giessen & Marburg; University of Gottingen; UNIVERSITY GOTTINGEN HOSPITAL; University of Munich; Goethe University Frankfurt; Goethe University Frankfurt Hospital; University of Wurzburg; Berlin Institute of Health; Free University of Berli…	Yaïci, R (corresponding author), Heinrich Heine Univ Dusseldorf, Med Fak, Klin Augenheilkunde, Univ Klinikum Dusseldorf, Moorenstr 5, D-40225 Dusseldorf, Germany.	remi.yaici@med.uni-duesseldorf.de	Hoffmann, Esther/AAY-3575-2020; Seitz, Berthold/AAB-8546-2019	Seitz, Berthold/0000-0001-9701-8204					45	1	1	1	3	SPRINGER HEIDELBERG	HEIDELBERG	TIERGARTENSTRASSE 17, D-69121 HEIDELBERG, GERMANY	2731-720X	2731-7218		OPHTHALMOLOGIE	Ophthalmologie	JUL	2024	121	7
J	Dihan, Q; Chauhan, MZ; Eleiwa, TK; Hassan, AK; Sallam, AB; Khouri, AS; Chang, TC; Elhusseiny, AM				Dihan, Qais; Chauhan, Muhammad z.; Eleiwa, Taher k.; Hassan, Amr k.; Sallam, Ahmed b.; Khouri, Albert s.; Chang, Ta c.; Elhusseiny, Abdelrahman m.			Using Large Language Models to Generate Educational Materials on Childhood Glaucoma	AMERICAN JOURNAL OF OPHTHALMOLOGY			English	Article							FOLLOW-UP; READABILITY; INFORMATION; ADHERENCE; BARRIERS; QUALITY; CARE	Purpose: To evaluate the quality, readability, and accuracy of large language model (LLM)-generated patient education materials (PEMs) on childhood glaucoma, and their ability to improve existing the readability of online information. Design: Cross-sectional comparative study. Methods: We evaluated responses of ChatGPT-3.5, ChatGPT-4, and Bard to 3 separate prompts requesting that they write PEMs…	[Dihan, Qais] Chicago Med Sch, Dept Med, N Chicago, IL USA; [Dihan, Qais; Chauhan, Muhammad z.; Sallam, Ahmed b.; Elhusseiny, Abdelrahman m.] Univ Arkansas Med Sci, Harvey & Bernice Jones Eye Inst, Dept Ophthalmol, Little Rock, AR USA; [Eleiwa, Taher k.] Univ Arkansas Med Sci, Harvey & Bernice Jones Eye Inst, Benha, AR USA; [Hassan, Amr k.] South Valley Univ, Fac Med, Dept Ophthalmol, Qena, Egypt…	Chicago Medical School; University of Arkansas System; University of Arkansas Medical Sciences; University of Arkansas System; University of Arkansas Medical Sciences; Egyptian Knowledge Bank (EKB); South Valley University Egypt; Egyptian Knowledge Bank (EKB); Ain Shams University; Rutgers University System; Rutgers University New Brunswick; Rutgers University Biomedical & Health Sciences; Bascom…	Elhusseiny, AM (corresponding author), Univ Arkansas Med Sci, Harvey & Bernice Jones Eye Inst, Little Rock, AR 72205 USA.	AMElhusseiny@uams.edu	Hassan, Amr/AAC-7704-2021; Sallam, Ahmed Mohamed/AAI-8317-2020; Eleiwa, Taher/AAW-4546-2020; Elhusseiny, Abdelrahman/J-8520-2019; Chang, Ta/D-7752-2017	Hassan, Amr/0000-0002-8281-9268; Eleiwa, Taher/0000-0003-3107-2106; Chang, Ta Chen/0000-0003-4827-5014; Khouri, Albert/0000-0002-0806-0898; Dihan, Qais/0009-0005-1471-288X; Elhusseiny, Abdelrahman/0000-0003-1412-375X					45	5	5	10	12	ELSEVIER SCIENCE INC	NEW YORK	STE 800, 230 PARK AVE, NEW YORK, NY 10169 USA	0002-9394	1879-1891		AM J OPHTHALMOL	Am. J. Ophthalmol.	SEP	2024	265
J	Cheong, KX; Zhang, CX; Tan, TE; Fenner, BJ; Wong, WM; Teo, KY; Wang, YX; Sivaprasad, S; Keane, PA; Lee, CS; Lee, AY; Cheung, CMG; Wong, TY; Cheong, YG; Song, SJ; Tham, YC				Cheong, Kai Xiong; Zhang, Chenxi; Tan, Tien-En; Fenner, Beau J.; Wong, Wendy Meihua; Teo, Kelvin Yc; Wang, Ya Xing; Sivaprasad, Sobha; Keane, Pearse A.; Lee, Cecilia Sungmin; Lee, Aaron Y.; Cheung, Chui Ming Gemmy; Wong, Tien Yin; Cheong, Yun-Gyung; Song, Su Jeong; Tham, Yih Chung			Comparing generative and retrieval-based chatbots in answering patient questions regarding age-related macular degeneration and diabetic retinopathy	BRITISH JOURNAL OF OPHTHALMOLOGY			English	Article						Macula; Public health; Retina		Background/aims To compare the performance of generative versus retrieval-based chatbots in answering patient inquiries regarding age-related macular degeneration (AMD) and diabetic retinopathy (DR). Methods We evaluated four chatbots: generative models (ChatGPT-4, ChatGPT-3.5 and Google Bard) and a retrieval-based model (OcularBERT) in a cross-sectional study. Their response accuracy to 45 quest…	[Cheong, Kai Xiong; Tan, Tien-En; Fenner, Beau J.; Teo, Kelvin Yc; Cheung, Chui Ming Gemmy; Tham, Yih Chung] Singapore Natl Eye Ctr, Singapore Eye Res Inst, Singapore, Singapore; [Zhang, Chenxi] Chinese Acad Med Sci, Beijing, Peoples R China; [Zhang, Chenxi] Peking Union Med Coll Hosp, Beijing, Peoples R China; [Fenner, Beau J.; Teo, Kelvin Yc; Cheung, Chui Ming Gemmy; Tham, Yih Chung] Duke NUS M…	Singapore National Eye Center; National University of Singapore; Chinese Academy of Medical Sciences - Peking Union Medical College; Chinese Academy of Medical Sciences - Peking Union Medical College; Peking Union Medical College Hospital; National University of Singapore; National University of Singapore; National University of Singapore; National University of Singapore; Capital Medical Univers…	Tham, YC (corresponding author), Singapore Natl Eye Ctr, Singapore Eye Res Inst, Singapore, Singapore.;Tham, YC (corresponding author), Duke NUS Med Sch, Ophthalmol & Visual Sci Acad Clin Program Eye ACP, Singapore, Singapore.;Tham, YC (corresponding author), Natl Univ Singapore, Ctr Innovat & Precis Eye Hlth, Yong Loo Lin Sch Med, Singapore, Singapore.;Tham, YC (corresponding author), Natl Univ …	thamyc@nus.edu.sg	Keane, Pearse/AAE-5709-2019; Tham, Yih Chung/IUP-0091-2023; Cheong, Kai/AAI-7243-2020; Wong, Tien/AAC-9724-2020; jing, wang/KCZ-2144-2024; Sivaprasad, S./D-6876-2015; Fenner, Beau/AEX-7515-2022; WONG 黄美华, WENDY/HZM-5481-2023; Lee, Aaron/MFZ-8723-2025; Lee, Cecilia/K-2569-2014	WONG, WENDY/0000-0002-4514-250X; Sivaprasad, Sobha/0000-0001-8952-0659; Tan, Tien-En/0000-0002-9869-5159; Lee, Cecilia/0000-0003-1994-7213; Lee, Aaron/0000-0002-7452-1648; Keane, Pearse/0000-0002-9239-745X	Institute of Information & Communications Technology Planning & Evaluation (IITP) - Korea government (MSIT) [2021-0-02068]	Institute of Information & Communications Technology Planning & Evaluation (IITP) - Korea government (MSIT)(Institute for Information & Communication Technology Planning & Evaluation (IITP), Republic of KoreaMinistry of Science & ICT (MSIT), Republic of Korea)	This work was supported in part by the Institute of Information & Communications Technology Planning & Evaluation (IITP) grant funded by the Korea government (MSIT) (No. 2021-0-02068, Artificial Intelligence Innovation Hub).		34	5	6	4	7	BMJ PUBLISHING GROUP	LONDON	BRITISH MED ASSOC HOUSE, TAVISTOCK SQUARE, LONDON WC1H 9JR, ENGLAND	0007-1161	1468-2079		BRIT J OPHTHALMOL	Br. J. Ophthalmol.	OCT	2024	108	10
J	Delsoz, M; Madadi, Y; Raja, H; Munir, WM; Tamm, B; Mehravaran, S; Soleimani, M; Djalilian, A; Yousefi, S				Delsoz, Mohammad; Madadi, Yeganeh; Raja, Hina; Munir, Wuqaas M.; Tamm, Brendan; Mehravaran, Shiva; Soleimani, Mohammad; Djalilian, Ali; Yousefi, Siamak			Performance of ChatGPT in Diagnosis of Corneal Eye Diseases	CORNEA			English	Article						ChatGPT; large language models; generative pretrained transformer; artificial intelligence; corneal eye diseases; provisional diagnosis	DIABETIC-RETINOPATHY	Purpose:The aim of this study was to assess the capabilities of ChatGPT-4.0 and ChatGPT-3.5 for diagnosing corneal eye diseases based on case reports and compare with human experts.Methods:We randomly selected 20 cases of corneal diseases including corneal infections, dystrophies, and degenerations from a publicly accessible online database from the University of Iowa. We then input the text of e…	[Delsoz, Mohammad; Madadi, Yeganeh; Raja, Hina; Yousefi, Siamak] Univ Tennessee, Hamilton Eye Inst, Dept Ophthalmol, Hlth Sci Ctr, Memphis, TN USA; [Munir, Wuqaas M.; Tamm, Brendan] Univ Maryland, Sch Med, Dept Ophthalmol & Visual Sci, Baltimore, MD USA; [Mehravaran, Shiva] Morgan State Univ, Sch Comp Math & Nat Sci, Dept Biol, Baltimore, MD USA; [Soleimani, Mohammad; Djalilian, Ali] Univ Illinoi…	University of Tennessee System; University of Tennessee Health Science Center; University System of Maryland; University of Maryland Baltimore; Morgan State University; University of Illinois System; University of Illinois Chicago; University of Illinois Chicago Hospital; Tehran University of Medical Sciences; Farabi Eye Hospital; University of Tennessee System; University of Tennessee Health Sci…	Yousefi, S (corresponding author), Univ Tennessee, Hamilton Eye Inst, Dept Ophthalmol, Dept Genet Genom & Informat,Hlth Sci Ctr, 930 Madison Ave,Suite 471, Memphis, TN 38163 USA.	Delsoz_mohammad@yahoo.com; yeganeh.madadi@gmail.com; hinaraja65@gmail.com; wmunir@som.umaryland.edu; btamm@som.umaryland.edu; shiva.mehravaran@morgan.edu; msolei2@uic.edu; adjalili@uic.edu; siamak.yousefi@uthsc.edu	Mehravaran, Shiva/AAJ-1293-2021; Delsoz, Mohammad/IUP-1811-2023; Raja, hina/AAR-5423-2021; Soleimani, Mohammad/C-6469-2014; Munir, Wuqaas/L-1404-2019; Madadi, Yeganeh/JUV-2768-2023	Yousefi, Siamak/0000-0001-8633-5730; Delsoz, Mohammad/0000-0001-5638-2034	NIH [R01EY033005, R21EY031725]; Research to Prevent Blindness, New York; Hamilton Eye Institute	NIH(United States Department of Health & Human ServicesNational Institutes of Health (NIH) - USA); Research to Prevent Blindness, New York(Research to Prevent Blindness (RPB)); Hamilton Eye Institute	Supported by NIH Grants R01EY033005 (S.Y.) and R21EY031725 (S.Y.); grants from Research to Prevent Blindness, New York (S.Y.); and supports from the Hamilton Eye Institute (S.Y.). The funders had no role in study design, data collection and analysis, decision to publish, or preparation of the manuscript.		33	20	20	10	16	LIPPINCOTT WILLIAMS & WILKINS	PHILADELPHIA	TWO COMMERCE SQ, 2001 MARKET ST, PHILADELPHIA, PA 19103 USA	0277-3740	1536-4798		CORNEA	Cornea	MAY	2024	43	5
J	Momenaei, B; Mansour, HA; Kuriyan, AE; Xu, D; Sridhar, J; Ting, DSW; Yonekawa, Y				Momenaei, Bita; Mansour, Hana A.; Kuriyan, Ajay E.; Xu, David; Sridhar, Jayanth; Ting, Daniel S. W.; Yonekawa, Yoshihiro			ChatGPT enters the room: what it means for patient counseling, physician education, academics, and disease management	CURRENT OPINION IN OPHTHALMOLOGY			English	Article						artificial-intelligence; ChatGPT; ophthalmology; retina	OPHTHALMOLOGY	Purpose of reviewThis review seeks to provide a summary of the most recent research findings regarding the utilization of ChatGPT, an artificial intelligence (AI)-powered chatbot, in the field of ophthalmology in addition to exploring the limitations and ethical considerations associated with its application.Recent findingsChatGPT has gained widespread recognition and demonstrated potential in en…	[Momenaei, Bita; Mansour, Hana A.; Kuriyan, Ajay E.; Xu, David; Yonekawa, Yoshihiro] Thomas Jefferson Univ, Wills Eye Hosp, Mid Atlantic Retina, Philadelphia, PA USA; [Sridhar, Jayanth] Univ Calif Los Angeles, Los Angeles, CA USA; [Ting, Daniel S. W.] Singapore Natl Eye Ctr, Singapore, Singapore; [Yonekawa, Yoshihiro] Thomas Jefferson Univ, Wills Eye Hosp, Retina Serv, Mid Atlantic Retina, 840 Wa…	Thomas Jefferson University; University of California System; University of California Los Angeles; Singapore National Eye Center; Thomas Jefferson University	Yonekawa, Y (corresponding author), Thomas Jefferson Univ, Wills Eye Hosp, Retina Serv, Mid Atlantic Retina, 840 Walnut St, Philadelphia, PA 19107 USA.	yyonekawa@midatlanticretina.com	Momenaei, Bita/AEP-4682-2022						38	9	9	2	5	LIPPINCOTT WILLIAMS & WILKINS	PHILADELPHIA	TWO COMMERCE SQ, 2001 MARKET ST, PHILADELPHIA, PA 19103 USA	1040-8738	1531-7021		CURR OPIN OPHTHALMOL	Curr. Opin. Ophthalmol.	MAY	2024	35	3
J	Huang, AS; Hirabayashi, K; Barna, L; Parikh, D; Pasquale, LR				Huang, Andy S.; Hirabayashi, Kyle; Barna, Laura; Parikh, Deep; Pasquale, Louis R.			Assessment of a Large Language Model's Responses to Questions and Cases About Glaucoma and Retina Management	JAMA OPHTHALMOLOGY			English	Article								Importance: Large language models (LLMs) are revolutionizing medical diagnosis and treatment, offering unprecedented accuracy and ease surpassing conventional search engines. Their integration into medical assistance programs will become pivotal for ophthalmologists as an adjunct for practicing evidence-based medicine. Therefore, the diagnostic and treatment accuracy of LLM-generated responses co…	[Huang, Andy S.; Hirabayashi, Kyle; Barna, Laura; Parikh, Deep; Pasquale, Louis R.] Icahn Sch Med Mt Sinai, Dept Ophthalmol, 310 E 14th St, New York, NY 10003 USA; [Barna, Laura] Harvard Med Sch, Dept Ophthalmol, Massachusetts Eye & Ear, Boston, MA USA	Icahn School of Medicine at Mount Sinai; Harvard University; Harvard Medical School; Harvard University Medical Affiliates; Massachusetts Eye & Ear Infirmary	Huang, AS (corresponding author), Icahn Sch Med Mt Sinai, Dept Ophthalmol, 310 E 14th St, New York, NY 10003 USA.	andyshihuang@gmail.com		Barna, Laura/0009-0002-6123-4348	Manhattan Eye and Ear Ophthalmology Alumni Foundation	Manhattan Eye and Ear Ophthalmology Alumni Foundation	No Statement Available		10	38	38	32	45	AMER MEDICAL ASSOC	CHICAGO	330 N WABASH AVE, STE 39300, CHICAGO, IL 60611-5885 USA	2168-6165	2168-6173		JAMA OPHTHALMOL	JAMA Ophthalmol.	APR	2024	142	4
J	Mihalache, A; Huang, RS; Popovic, MM; Patil, NS; Pandya, BU; Shor, R; Pereira, A; Kwok, JM; Yan, P; Wong, DT; Kertes, PJ; Muni, RH				Mihalache, Andrew; Huang, Ryan S.; Popovic, Marko M.; Patil, Nikhil S.; Pandya, Bhadra U.; Shor, Reut; Pereira, Austin; Kwok, Jason M.; Yan, Peng; Wong, David T.; Kertes, Peter J.; Muni, Rajeev H.			Accuracy of an Artificial Intelligence Chatbot's Interpretation of Clinical Ophthalmic Images	JAMA OPHTHALMOLOGY			English	Article							TABLES	Importance: Ophthalmology is reliant on effective interpretation of multimodal imaging to ensure diagnostic accuracy. The new ability of ChatGPT-4 (OpenAI) to interpret ophthalmic images has not yet been explored. Objective: To evaluate the performance of the novel release of an artificial intelligence chatbot that is capable of processing imaging data. Design, Setting, and Participants: This cro…	[Mihalache, Andrew; Huang, Ryan S.; Pandya, Bhadra U.; Kwok, Jason M.; Yan, Peng] Univ Toronto, Temerty Sch Med, Toronto, ON, Canada; [Popovic, Marko M.; Shor, Reut; Pereira, Austin; Kwok, Jason M.; Yan, Peng; Wong, David T.; Kertes, Peter J.; Muni, Rajeev H.] Univ Toronto, Dept Ophthalmol & Vis Sci, Toronto, ON, Canada; [Patil, Nikhil S.] McMaster Univ, Michael G DeGroote Sch Med, Hamilton, ON, …	University of Toronto; University of Toronto; McMaster University; University of Toronto; Saint Michaels Hospital Toronto; University of Toronto; Sunnybrook Health Science Center; Sunnybrook Research Institute	Muni, RH (corresponding author), St Michaels Hosp, Dept Ophthalmol, Unity Hlth Toronto, 30 Bond St,Donnelly Wing,8th Floor, Toronto, ON M5B 1W8, Canada.	rajeev.muni@utoronto.ca	Huang, Ryan/KHD-7917-2024; Mihalache, Andrew/IUQ-3061-2023	Patil, Nikhil/0000-0003-3929-0482; Huang, Ryan S./0000-0002-3404-5376					27	33	33	16	34	AMER MEDICAL ASSOC	CHICAGO	330 N WABASH AVE, STE 39300, CHICAGO, IL 60611-5885 USA	2168-6165	2168-6173		JAMA OPHTHALMOL	JAMA Ophthalmol.	APR	2024	142	4
J	Carlà, MM; Gambini, G; Baldascino, A; Boselli, F; Giannuzzi, F; Margollicci, F; Rizzo, S				Carla, Matteo Mario; Gambini, Gloria; Baldascino, Antonio; Boselli, Francesco; Giannuzzi, Federico; Margollicci, Fabio; Rizzo, Stanislao			Large language models as assistance for glaucoma surgical cases: a ChatGPT vs. Google Gemini comparison	GRAEFES ARCHIVE FOR CLINICAL AND EXPERIMENTAL OPHTHALMOLOGY			English	Article						Large language models (LLM); ChatGPT; Google Gemini; Google Bard; Glaucoma; Artificial intelligence (AI); Glaucoma surgery	OPEN-ANGLE GLAUCOMA	Purpose The aim of this study was to define the capability of ChatGPT-4 and Google Gemini in analyzing detailed glaucoma case descriptions and suggesting an accurate surgical plan.Methods Retrospective analysis of 60 medical records of surgical glaucoma was divided into ordinary (n = 40) and challenging (n = 20) scenarios. Case descriptions were entered into ChatGPT and Bard's interfaces with the…	[Carla, Matteo Mario; Gambini, Gloria; Baldascino, Antonio; Boselli, Francesco; Giannuzzi, Federico; Margollicci, Fabio; Rizzo, Stanislao] Fdn Policlin Univ A Gemelli, Ophthalmol Dept, IRCCS, I-00168 Rome, Italy; [Carla, Matteo Mario; Gambini, Gloria; Baldascino, Antonio; Boselli, Francesco; Giannuzzi, Federico; Margollicci, Fabio; Rizzo, Stanislao] Univ Cattolica Sacro Cuore, Ophthalmol Dept, La…	Catholic University of the Sacred Heart; IRCCS Policlinico Gemelli; Catholic University of the Sacred Heart; IRCCS Policlinico Gemelli	Carlà, MM (corresponding author), Fdn Policlin Univ A Gemelli, Ophthalmol Dept, IRCCS, I-00168 Rome, Italy.;Carlà, MM (corresponding author), Univ Cattolica Sacro Cuore, Ophthalmol Dept, Largo A Gemelli 8, Rome, Italy.	mm.carla94@gmail.com	Gambini, Gloria/AAE-9479-2021	Carla, Matteo Mario/0000-0003-2979-1638	Universit Cattolica del Sacro Cuore	Universit Cattolica del Sacro Cuore	None.		36	17	17	5	13	SPRINGER	NEW YORK	ONE NEW YORK PLAZA, SUITE 4600, NEW YORK, NY, UNITED STATES	0721-832X	1435-702X		GRAEF ARCH CLIN EXP	Graefes Arch. Clin. Exp. Ophthalmol.	SEP	2024	262	9
J	Cohen, SA; Brant, A; Fisher, AC; Pershing, S; Do, D; Pan, CRY				Cohen, Samuel A.; Brant, Arthur; Fisher, Ann Caroline; Pershing, Suzann; Do, Diana; Pan, Carolyn			Dr. Google vs. Dr. ChatGPT: Exploring the Use of Artificial Intelligence in Ophthalmology by Comparing the Accuracy, Safety, and Readability of Responses to Frequently Asked Patient Questions Regarding Cataracts and Cataract Surgery	SEMINARS IN OPHTHALMOLOGY			English	Article						Cataract surgery; cataracts; ChatGPT; patient education; readability; Google	IMPACT	Purpose: Patients are using online search modalities to learn about their eye health. While Google remains the most popular search engine, the use of large language models (LLMs) like ChatGPT has increased. Cataract surgery is the most common surgical procedure in the US, and there is limited data on the quality of online information that populates after searches related to cataract surgery on se…	[Cohen, Samuel A.; Brant, Arthur; Fisher, Ann Caroline; Pershing, Suzann; Do, Diana; Pan, Carolyn] Stanford Univ, Byers Eye Inst, Sch Med, Stanford, CA USA; [Pan, Carolyn] Stanford Univ, Byers Eye Inst Stanford, Sch Med, 2452 Watson Court Palo Alto, Stanford, CA 94303 USA	Stanford University; Stanford University	Pan, CRY (corresponding author), Stanford Univ, Byers Eye Inst Stanford, Sch Med, 2452 Watson Court Palo Alto, Stanford, CA 94303 USA.	ckpan@stanford.edu		Pan, Carolyn/0000-0002-1031-7488					38	14	14	12	17	TAYLOR & FRANCIS INC	PHILADELPHIA	530 WALNUT STREET, STE 850, PHILADELPHIA, PA 19106 USA	0882-0538	1744-5205		SEMIN OPHTHALMOL	Semin. Ophthalmol.	AUG 17	2024	39	6
J	Tao, BKL; Hua, N; Milkovich, J; Micieli, JA				Tao, Brendan Ka-Lok; Hua, Nicholas; Milkovich, John; Micieli, Jonathan Andrew			ChatGPT-3.5 and Bing Chat in ophthalmology: an updated evaluation of performance, readability, and informative sources	EYE			English	Article							DIABETIC-RETINOPATHY; IMAGES; SMOG	Background/Objectives: Experimental investigation. Bing Chat (Microsoft) integration with ChatGPT-4 (OpenAI) integration has conferred the capability of accessing online data past 2021. We investigate its performance against ChatGPT-3.5 on a multiple-choice question ophthalmology exam. Subjects/Methods: In August 2023, ChatGPT-3.5 and Bing Chat were evaluated against 913 questions derived from th…	[Tao, Brendan Ka-Lok] Univ British Columbia, Fac Med, 317-2194 Hlth Sci Mall, Vancouver, BC V6T 1Z3, Canada; [Hua, Nicholas; Milkovich, John; Micieli, Jonathan Andrew] Univ Toronto, Temerty Fac Med, 1 Kings Coll Circle, Toronto, ON M5S 1A8, Canada; [Micieli, Jonathan Andrew] Univ Toronto, Dept Ophthalmol & Vis Sci, 340 Coll St, Toronto, ON M5T 3A9, Canada; [Micieli, Jonathan Andrew] Univ Toronto,…	University of British Columbia; University of Toronto; University of Toronto; University of Toronto; University of Toronto; Saint Michaels Hospital Toronto; University of Toronto; University Health Network Toronto; University of Toronto; University Health Network Toronto	Micieli, JA (corresponding author), Univ Toronto, Temerty Fac Med, 1 Kings Coll Circle, Toronto, ON M5S 1A8, Canada.;Micieli, JA (corresponding author), Univ Toronto, Dept Ophthalmol & Vis Sci, 340 Coll St, Toronto, ON M5T 3A9, Canada.;Micieli, JA (corresponding author), Univ Toronto, Dept Med, Div Neurol, 6 Queens Pk Crescent West, Toronto, ON M5S 3H2, Canada.;Micieli, JA (corresponding author),…	jonathanmicieli@gmail.com		Tao, Brendan/0000-0001-7069-3162	Eye Foundation of Canada	Eye Foundation of Canada	BT is funded by the Eye Foundation of Canada. No other financial support.		30	8	8	1	6	SPRINGERNATURE	LONDON	CAMPUS, 4 CRINAN ST, LONDON, N1 9XW, ENGLAND	0950-222X	1476-5454		EYE	Eye	JUL	2024	38	10
J	Zhang, X; Ma, L; Sun, D; Yi, M; Wang, ZW				Zhang, Xu; Ma, Li; Sun, Di; Yi, Mo; Wang, Zhiwen			Artificial Intelligence in Telemedicine: A Global Perspective Visualization Analysis	TELEMEDICINE AND E-HEALTH			English	Article						artificial intelligence; telemedicine; bibliometric; visualization; hotspots	DIABETIC-RETINOPATHY; HEALTH; TRENDS	Background: The use of artificial intelligence (AI) in telemedicine has been a popular topic in academic research in recent years, resulting in a surge of literature publications. This study provides a scientific overview of AI in telemedicine through bibliometric and visualization analysis.Methods: The Web of Science Core Collection was used as the data source, and the search was conducted on Ju…	[Zhang, Xu; Yi, Mo; Wang, Zhiwen] Peking Univ, Sch Nursing, 38 Xueyuan Rd, Beijing 100191, Peoples R China; [Ma, Li] Peking Univ Third Hosp, Dept Emergency Med, Beijing, Peoples R China; [Sun, Di] Liaoning Univ Tradit Chinese Med, Sch Nursing, Shenyang, Liaoning, Peoples R China	Peking University; Liaoning University of Traditional Chinese Medicine	Wang, ZW (corresponding author), Peking Univ, Sch Nursing, 38 Xueyuan Rd, Beijing 100191, Peoples R China.	wzwjing@sina.com			Peking University Nursing Discipline Research Development Fund [TYZH2023001]; Peking University Evidence-based Nursing Research Fund [XZJJ-2023-01]	Peking University Nursing Discipline Research Development Fund; Peking University Evidence-based Nursing Research Fund	Research reported in this publication was supported by the Peking University Nursing Discipline Research Development Fund (No. TYZH2023001) and the Peking University Evidence-based Nursing Research Fund (No. XZJJ-2023-01).		63	3	3	38	61	MARY ANN LIEBERT, INC	NEW ROCHELLE	140 HUGUENOT STREET, 3RD FL, NEW ROCHELLE, NY 10801 USA	1530-5627	1556-3669		TELEMED E-HEALTH	Telemed. e-Health	JUL 1	2024	30	7
J	Marshall, RF; Mallem, K; Xu, HN; Thorne, J; Burkholder, B; Chaon, B; Liberman, P; Berkenstock, M				Marshall, Rayna F.; Mallem, Krishna; Xu, Hannah; Thorne, Jennifer; Burkholder, Bryn; Chaon, Benjamin; Liberman, Paulina; Berkenstock, Meghan			Investigating the Accuracy and Completeness of an Artificial Intelligence Large Language Model About Uveitis: An Evaluation of ChatGPT	OCULAR IMMUNOLOGY AND INFLAMMATION			English	Article						Artificial intelligence; ChatGPT; large language model; ophthalmology; uveitis		PurposeTo assess the accuracy and completeness of ChatGPT-generated answers regarding uveitis description, prevention, treatment, and prognosis.MethodsThirty-two uveitis-related questions were generated by a uveitis specialist and inputted into ChatGPT 3.5. Answers were compiled into a survey and were reviewed by five uveitis specialists using standardized Likert scales of accuracy and completene…	[Marshall, Rayna F.; Mallem, Krishna] Drexel Univ, Coll Med, Philadelphia, PA USA; [Xu, Hannah] Univ Calif San Diego, San Diego, CA USA; [Thorne, Jennifer; Burkholder, Bryn; Chaon, Benjamin; Liberman, Paulina; Berkenstock, Meghan] Johns Hopkins Univ, Wilmer Eye Inst, Div Ocular Immunol, Sch Med, Baltimore, MD USA; [Berkenstock, Meghan] Wilmer Eye Inst, Div Ocular Immunol, 600 N Wolfe St Maumenee …	Drexel University; University of California System; University of California San Diego; Johns Hopkins University; Johns Hopkins Medicine; Johns Hopkins University; Johns Hopkins Medicine	Berkenstock, M (corresponding author), Wilmer Eye Inst, Div Ocular Immunol, 600 N Wolfe St Maumenee 3rd floor, Baltimore, MD 21287 USA.	mberken2@jhmi.edu	Chaon, Ben/KYQ-3736-2024	Marshall, Rayna/0000-0002-6961-1278; Liberman, Paulina/0000-0002-1053-8651					18	7	7	1	4	TAYLOR & FRANCIS INC	PHILADELPHIA	530 WALNUT STREET, STE 850, PHILADELPHIA, PA 19106 USA	0927-3948	1744-5078		OCUL IMMUNOL INFLAMM	Ocul. Immunol. Inflamm.	OCT 20	2024	32	9
J	Milad, D; Antaki, F; Milad, J; Farah, A; Khairy, T; Mikhail, D; Giguère, CÉ; Touma, S; Bernstein, A; Szigiato, AA; Nayman, T; Mullie, GA; Duval, R				Milad, Daniel; Antaki, Fares; Milad, Jason; Farah, Andrew; Khairy, Thomas; Mikhail, David; Giguere, Charles-Edouard; Touma, Samir; Bernstein, Allison; Szigiato, Andrei-Alexandru; Nayman, Taylor; Mullie, Guillaume A.; Duval, Renaud			Assessing the medical reasoning skills of GPT-4 in complex ophthalmology cases	BRITISH JOURNAL OF OPHTHALMOLOGY			English	Article								Background/aims This study assesses the proficiency of Generative Pre-trained Transformer (GPT)-4 in answering questions about complex clinical ophthalmology cases. Methods We tested GPT-4 on 422 Journal of the American Medical Association Ophthalmology Clinical Challenges, and prompted the model to determine the diagnosis (open-ended question) and identify the next-step (multiple-choice question…	[Milad, Daniel; Antaki, Fares; Touma, Samir; Bernstein, Allison; Szigiato, Andrei-Alexandru; Nayman, Taylor; Mullie, Guillaume A.; Duval, Renaud] Univ Montreal, Dept Ophthalmol, Montreal, PQ, Canada; [Milad, Daniel; Touma, Samir; Bernstein, Allison; Nayman, Taylor; Duval, Renaud] Hop Maisonneuve Rosement, Dept Ophthalmol, Montreal, PQ, Canada; [Antaki, Fares] UCL, Inst Ophthalmol, London, England…	Universite de Montreal; University of London; University College London; Universite de Montreal; University of Waterloo; McGill University; University of Toronto; Universite de Montreal	Duval, R (corresponding author), Univ Montreal, Dept Ophthalmol, Montreal, PQ, Canada.;Duval, R (corresponding author), Hop Maisonneuve Rosement, Dept Ophthalmol, Montreal, PQ, Canada.	renaud.duval@gmail.com	Antaki, Fares/GSI-6622-2022	Milad, Daniel/0000-0002-0693-3421; Touma, Samir/0000-0002-6365-0946; Mikhail, David/0009-0009-0831-1915; Szigiato, Andrei-Alexandru/0000-0003-0862-9068; Farah, Andrew/0009-0005-3165-4829; Antaki, Fares/0000-0001-6679-7276					27	13	13	4	12	BMJ PUBLISHING GROUP	LONDON	BRITISH MED ASSOC HOUSE, TAVISTOCK SQUARE, LONDON WC1H 9JR, ENGLAND	0007-1161	1468-2079		BRIT J OPHTHALMOL	Br. J. Ophthalmol.	OCT	2024	108	10
J	Kianian, R; Sun, DY; Giaconi, J				Kianian, Reza; Sun, Deyu; Giaconi, Joann			Can ChatGPT Aid Clinicians in Educating Patients on the Surgical Management of Glaucoma?	JOURNAL OF GLAUCOMA			English	Article						artificial intelligence; ChatGPT; readability; consumer health information; glaucoma	LOW HEALTH LITERACY; INFORMATION; READABILITY; QUALITY; RELIABILITY; INTERNET; OUTCOMES; DISCERN	Prcis: ChatGPT can help health care providers automate the quality assessment of online health information, but it does not produce easier-to-understand responses compared with existing online health information. Purpose: To compare the readability of ChatGPT-generated health information about glaucoma surgery to existing material online and to evaluate ChatGPT's ability to analyze the quality of…	[Kianian, Reza; Sun, Deyu; Giaconi, Joann] Univ Calif Los Angeles, David Geffen Sch Med, Stein Eye Inst, Dept Ophthalmol, Los Angeles, CA 90095 USA; [Giaconi, Joann] Vet Hlth Adm Greater Los Angeles, Dept Surg, Los Angeles, CA USA	University of California System; University of California Los Angeles; University of California Los Angeles Medical Center; David Geffen School of Medicine at UCLA; US Department of Veterans Affairs; Veterans Health Administration (VHA)	Giaconi, J (corresponding author), Univ Calif Los Angeles, Jules Stein Eye Inst, David Geffen Sch Med, 100 Stein Plaza, Los Angeles, CA 90095 USA.	rkianian@mednet.ucla.edu; deyusun@mednet.ucla.edu; giaconi@jsei.ucla.edu							36	12	12	4	20	LIPPINCOTT WILLIAMS & WILKINS	PHILADELPHIA	TWO COMMERCE SQ, 2001 MARKET ST, PHILADELPHIA, PA 19103 USA	1057-0829	1536-481X		J GLAUCOMA	J. Glaucoma	FEB	2024	33	2
J	Hurley, NC; Gupta, RK; Schroeder, KM; Hess, AS				Hurley, Nathan C.; Gupta, Rajnish K.; Schroeder, Kristopher M.; Hess, Aaron S.			Danger, Danger, Gaston Labat! Does zero-shot artificial intelligence correlate with anticoagulation guidelines recommendations for neuraxial anesthesia?	REGIONAL ANESTHESIA AND PAIN MEDICINE			English	Article						Anticoagulation; Nerve Block; Pain Management; TECHNOLOGY	DIABETIC-RETINOPATHY; REGIONAL ANESTHESIA; VALIDATION	IntroductionArtificial intelligence and large language models (LLMs) have emerged as potentially disruptive technologies in healthcare. In this study GPT-3.5, an accessible LLM, was assessed for its accuracy and reliability in performing guideline-based evaluation of neuraxial bleeding risk in hypothetical patients on anticoagulation medication. The study also explored the impact of structured pr…	[Hurley, Nathan C.; Hess, Aaron S.] Univ Wisconsin Madison, Dept Anesthesiol, Madison, WI 53706 USA; [Gupta, Rajnish K.] Vanderbilt Univ Sch Med, Anesthesiol, Nashville, TN USA; [Schroeder, Kristopher M.] Univ Wisconsin Madison, Anesthesiol, Madison, WI USA; [Hess, Aaron S.] Univ Wisconsin Madison, Dept Pathol & Lab Med, Madison, WI USA	University of Wisconsin System; University of Wisconsin Madison; Vanderbilt University; University of Wisconsin System; University of Wisconsin Madison; University of Wisconsin System; University of Wisconsin Madison	Hess, AS (corresponding author), Univ Wisconsin Madison, Dept Anesthesiol, Madison, WI 53706 USA.	ahess5@wisc.edu	Gupta, Rajnish/AAH-2897-2019; Hess, Aaron/ABW-4260-2022	Gupta, Rajnish/0000-0003-3401-4737					32	4	4	4	17	BMJ PUBLISHING GROUP	LONDON	BRITISH MED ASSOC HOUSE, TAVISTOCK SQUARE, LONDON WC1H 9JR, ENGLAND	1098-7339	1532-8651		REGION ANESTH PAIN M	Region. Anesth. Pain Med.	SEP	2024	49	9
J	Yilmaz, IE; Dogan, L				Yilmaz, Ibrahim Edhem; Dogan, Levent			Talking technology: exploring chatbots as a tool for cataract patient education	CLINICAL AND EXPERIMENTAL OPTOMETRY			English	Article						Cataracts; chatbot; conversational artificial intelligence; health literacy; information accessibility; patient education	HEALTH; STRATEGIES	Clinical relevance: Worldwide, millions suffer from cataracts, which impair vision and quality of life. Cataract education improves outcomes, satisfaction, and treatment adherence. Lack of health literacy, language and cultural barriers, personal preferences, and limited resources may all impede effective communication.Background: AI can improve patient education by providing personalised, intera…	[Yilmaz, Ibrahim Edhem; Dogan, Levent] Kilis State Hosp, Kilis, Turkiye	Kilis State Hospital	Yilmaz, IE (corresponding author), Kilis State Hosp, Kilis, Turkiye.	dredhemyilmaz@gmail.com	Yılmaz, İbrahim/KMX-4790-2024; Doğan, Levent/ADQ-8804-2022	Yilmaz, Ibrahim/0000-0003-1503-4046; Dogan, Levent/0000-0002-4849-3698; Yilmaz, Ibrahim Edhem/0000-0003-1154-425X	not receive any specific grant from funding agencies in the public, commercial, or not-for-profit sectors; AI-assisted technologies in the writing process	not receive any specific grant from funding agencies in the public, commercial, or not-for-profit sectors; AI-assisted technologies in the writing process	The authors declare use of generative AI and AI-assisted technologies in the writing process. During the preparation of this work the authors used QuillBot tool to improve language and readability, with caution. After using this tool/service, the authors reviewed and edited the content as needed and took full responsibility for the content of the publication.		43	10	10	8	27	TAYLOR & FRANCIS LTD	ABINGDON	2-4 PARK SQUARE, MILTON PARK, ABINGDON OR14 4RN, OXON, ENGLAND	0816-4622	1444-0938		CLIN EXP OPTOM	Clin. Exp. Optom.	JAN 2	2025	108	1
J	Chang, LC; Sun, CC; Chen, TH; Tsai, DC; Lin, HL; Liao, LL				Chang, Li-Chun; Sun, Chi-Chin; Chen, Ting-Han; Tsai, Der-Chong; Lin, Hui-Ling; Liao, Li-Ling			Evaluation of the quality and readability of ChatGPT responses to frequently asked questions about myopia in traditional Chinese language	DIGITAL HEALTH			English	Article						ChatGPT; myopia; ophthalmologists; health education; quality	CHILDREN; ORTHOKERATOLOGY; METAANALYSIS; PROGRESSION	Introduction ChatGPT can serve as an adjunct informational tool for ophthalmologists and their patients. However, the reliability and readability of its responses to myopia-related queries in the Chinese language remain underexplored.Purpose This study aimed to evaluate the ability of ChatGPT to address frequently asked questions (FAQs) about myopia by parents and caregivers.Method Myopia-related…	[Chang, Li-Chun; Lin, Hui-Ling] Chang Gung Univ Sci & Technol, Sch Nursing, Gueishan, Taiwan; [Chang, Li-Chun; Lin, Hui-Ling] Chang Gung Univ, Coll Med, Sch Nursing, Tao Yuan, Taiwan; [Chang, Li-Chun; Lin, Hui-Ling] Linkou Chang Gung Mem Hosp, Dept Nursing, Linkou, Taiwan; [Sun, Chi-Chin] Chang Gung Mem Hosp, Dept Ophthalmol, Keelung, Taiwan; [Sun, Chi-Chin] Chang Gung Univ, Coll Med, Sch Med, Ta…	Chang Gung University of Science & Technology; Chang Gung University; Chang Gung Memorial Hospital; Chang Gung Memorial Hospital; Chang Gung University; Chang Gung University of Science & Technology; National Yang Ming Chiao Tung University; National Yang Ming Chiao Tung University; National Yang Ming Chiao Tung University; Taipei Medical University; Kaohsiung Medical University; Kaohsiung Medica…	Liao, LL (corresponding author), Kaohsiung Med Univ, Coll Hlth Sci, Dept Publ Hlth, Kaohsiung, Taiwan.;Liao, LL (corresponding author), Kaohsiung Med Univ Hosp, Dept Med Res, Kaohsiung, Taiwan.	liling@kmu.edu.tw	LIN, HUI-LING/HJB-4015-2022; Tsai, Der-Chong/IUM-4054-2023; Liao, Li-Ling/KDO-4883-2024	Liao, Li-Ling/0000-0003-0867-2699			The structure of part of the results section was generated using ChatGPT. We sincerely appreciate the invaluable input of the ten participating ophthalmologists who provided their evaluation of ChatGPT's responses on myopia.		39	0	0	9	9	SAGE PUBLICATIONS LTD	LONDON	1 OLIVERS YARD, 55 CITY ROAD, LONDON EC1Y 1SP, ENGLAND	2055-2076			DIGIT HEALTH	Digit. Health		2024	10
J	Wang, Y; Liang, LH; Li, R; Wang, YH; Hao, CF				Wang, Yan; Liang, Lihua; Li, Ran; Wang, Yihua; Hao, Changfu			Comparison of the Performance of ChatGPT, Claude and Bard in Support of Myopia Prevention and Control	JOURNAL OF MULTIDISCIPLINARY HEALTHCARE			English	Article						chatbot; large language model; public health; myopia	PRIMARY-CARE; HEALTH; PREVALENCE; COUNTRIES	Purpose: Chatbots, which are based on large language models, are increasingly being used in public health. However, the effectiveness of chatbot responses has been debated, and their performance in myopia prevention and control has not been fully explored. This study aimed to evaluate the effectiveness of three well-known chatbots-ChatGPT, Claude, and Bard-in responding to public health questions…	[Wang, Yan; Hao, Changfu] Zhengzhou Univ, Sch Publ Hlth, Dept Child & Adolescent Hlth, Sci Ave, Zhengzhou 450001, Henan, Peoples R China; [Liang, Lihua; Li, Ran] Zhengzhou Municipal Educ Bur, Primary & Secondary Sch Hlth Ctr, Zhengzhou Educ Sci Planning & Evaluat Ctr, Zhengzhou, Henan, Peoples R China; [Wang, Yihua] Zhengzhou Univ, Inst Sci & Technol Informat, Sci Ave, Zhengzhou 450001, Henan, Pe…	Zhengzhou University; Zhengzhou University	Hao, CF (corresponding author), Zhengzhou Univ, Sch Publ Hlth, Dept Child & Adolescent Hlth, Sci Ave, Zhengzhou 450001, Henan, Peoples R China.;Wang, YH (corresponding author), Zhengzhou Univ, Inst Sci & Technol Informat, Sci Ave, Zhengzhou 450001, Henan, Peoples R China.	wangyh2015@icloud.com; haochangfu@126.com	Liang, Lihua/G-9279-2012	Wang, Yan/0009-0006-9832-8478; Hao, Changfu/0000-0001-6819-2529					76	1	1	8	8	DOVE MEDICAL PRESS LTD	ALBANY	PO BOX 300-008, ALBANY, AUCKLAND 0752, NEW ZEALAND	1178-2390			J MULTIDISCIP HEALTH	J. Multidiscip. Healthc.		2024	17
J	Xia, ZQ; Hu, HY; Li, WJ; Jiang, QS; Pu, L; Shu, YC; Sangaiah, AK				Xia, Zhuoqun; Hu, Hangyu; Li, Wenjing; Jiang, Qisheng; Pu, Lan; Shu, Yicong; Sangaiah, Arun Kumar			Scheme Based on Multi-Level Patch Attention and Lesion Localization for Diabetic Retinopathy Grading	CMES-COMPUTER MODELING IN ENGINEERING & SCIENCES			English	Article						DDR dataset; diabetic retinopathy; lesion localization; multi-level patch attention mechanism	SYSTEM	Early screening of diabetes retinopathy (DR) plays an important role in preventing irreversible blindness. Existing research has failed to fully explore effective DR lesion information in fundus maps. Besides, traditional attention schemes have not considered the impact of lesion type differences on grading, resulting in unreasonable extraction of important lesion features. Therefore, this paper …	[Xia, Zhuoqun; Hu, Hangyu; Jiang, Qisheng; Pu, Lan; Shu, Yicong] Changsha Univ Sci & Technol, Sch Comp & Commun Engn, Changsha, Peoples R China; [Li, Wenjing] Hunan Normal Univ, Hunan Prov Peoples Hosp, Affiliated Hosp 1, Changsha, Peoples R China; [Li, Wenjing] Guangxi Med Univ, Affiliated Hosp 1, Nanning, Peoples R China; [Sangaiah, Arun Kumar] Natl Yunlin Univ Sci & Technol, Int Grad Inst AI, …	Changsha University of Science & Technology; Hunan Normal University; Guangxi Medical University; National Yunlin University Science & Technology; Lebanese American University	Sangaiah, AK (corresponding author), Natl Yunlin Univ Sci & Technol, Int Grad Inst AI, Yunlin, Peoples R China.;Sangaiah, AK (corresponding author), Lebanese Amer Univ, Dept Elect & Comp Engn, Byblos, Lebanon.	aksangaiah@ieee.org	Li, Wenjing/ABA-9384-2022; Sangaiah, Arun Kumar/U-6785-2019	Sangaiah, Arun Kumar/0000-0002-0229-2460	Research on the Application of Multi-modal Artificial Intelligence in Diagnosis and Treatment of Type 2 Diabetes [2020SK50910]; Hunan Provincial Natural Science Foundation of China [2023JJ60020]	Research on the Application of Multi-modal Artificial Intelligence in Diagnosis and Treatment of Type 2 Diabetes; Hunan Provincial Natural Science Foundation of China(Natural Science Foundation of Hunan Province)	Funding Statement: This work was supported in part by the Research on the Application of Multi-modal Artificial Intelligence in Diagnosis and Treatment of Type 2 Diabetes under Grant No. 2020SK50910, in part by the Hunan Provincial Natural Science Foundation of China under Grant 2023JJ60020.		41	1	1	2	5	TECH SCIENCE PRESS	HENDERSON	871 CORONADO CENTER DR, SUTE 200, HENDERSON, NV 89052 USA	1526-1492	1526-1506		CMES-COMP MODEL ENG	CMES-Comp. Model. Eng. Sci.		2024	140	1
J	Xu, J; Lu, L; Peng, XW; Pang, JL; Ding, JR; Yang, LR; Song, H; Li, K; Sun, X; Zhang, ST				Xu, Jie; Lu, Lu; Peng, Xinwei; Pang, Jiali; Ding, Jinru; Yang, Lingrui; Song, Huan; Li, Kang; Sun, Xin; Zhang, Shaoting			Data Set and Benchmark (MedGPTEval) to Evaluate Responses From Large Language Models in Medicine: Evaluation Development and Validation	JMIR MEDICAL INFORMATICS			English	Article						ChatGPT; LLM; assessment; data set; benchmark; medicine	DELPHI METHOD	Background: Large language models (LLMs) have achieved great progress in natural language processing tasks and demonstrated the potential for use in clinical applications. Despite their capabilities, LLMs in the medical domain are prone to generating hallucinations (not fully reliable responses). Hallucinations in LLMs' responses create substantial risks, potentially threatening patients' physica…	[Xu, Jie; Lu, Lu; Peng, Xinwei; Pang, Jiali; Ding, Jinru; Zhang, Shaoting] Shanghai Artificial Intelligence Lab, OpenMedLab, Shanghai, Peoples R China; [Yang, Lingrui; Sun, Xin] Shanghai Jiao Tong Univ, Xinhua Hosp, Clin Res & Innovat Unit, Sch Med, Shanghai, Peoples R China; [Song, Huan; Li, Kang] Sichuan Univ, West China Hosp, West China Biomed Big Data Ctr, Chengdu, Peoples R China; [Song, Hua…	Shanghai Jiao Tong University; Sichuan University; Sichuan University	Zhang, ST (corresponding author), West Bank Int Artificial Intelligence Ctr, Shanghai Artificial Intelligence Lab, OpenMedLab, 701 Yunjin Rd, Shanghai 200032, Peoples R China.	zhangshaoting@pjlab.org.cn	Ding, Jinru/IZE-4068-2023; Sun, Xin/HSF-4456-2023; Zhang, Zhao/B-5136-2010; XU, JIE/GSD-9149-2022	XU, JIE/0000-0001-9233-4363; Song, Huan/0000-0003-3845-8079; LU, LU/0000-0002-8834-1947; ding, jinru/0009-0005-0399-7656; Pang, Jiali/0000-0001-5757-4804; Peng, Xinwei/0000-0001-9868-0136; Yang, Lingrui/0009-0005-4902-1034; Li, Kang/0000-0002-8136-9816	Shanghai Artificial Intelligence Laboratory	Shanghai Artificial Intelligence Laboratory	Acknowledgments This research was supported by the Shanghai Artificial Intelligence Laboratory.		33	3	3	12	16	JMIR PUBLICATIONS, INC	TORONTO	130 QUEENS QUAY East, Unit 1100, TORONTO, ON M5A 0P6, CANADA		2291-9694		JMIR MED INF	JMIR Med. Inf.		2024	12
J	Fu, JX; Yang, JR; Li, QM; Huang, DQ; Yang, HY; Xie, XL; Xu, HX; Zhang, MZ; Zheng, C				Fu, Junxia; Yang, Junrui; Li, Qiuman; Huang, Danqing; Yang, Hongyang; Xie, Xiaoling; Xu, Huaxin; Zhang, Mingzhi; Zheng, Ce			What can we learn from a Chinese social media used by glaucoma patients?	BMC OPHTHALMOLOGY			English	Article						Glaucoma; Social media; Word cloud analysis	QUALITY-OF-LIFE; OPEN-ANGLE GLAUCOMA; DEPRESSION; TRAVOPROST; SATISFACTION; BIMATOPROST; PREVALENCE; DISEASE; ANXIETY; VISION	PurposeOur study aims to discuss glaucoma patients' needs and Internet habits using big data analysis and Natural Language Processing (NLP) based on deep learning (DL).MethodsIn this retrospective study, we used web crawler technology to crawl glaucoma-related topic posts from the glaucoma bar of Baidu Tieba, China. According to the contents of topic posts, we classified them into posts with seek…	[Fu, Junxia; Zheng, Ce] Shanghai Jiao Tong Univ, Xinhua Hosp, Sch Med, Dept Ophthalmol, Shanghai 200092, Peoples R China; [Fu, Junxia; Huang, Danqing; Yang, Hongyang; Zheng, Ce] Shanghai Jiao Tong Univ, Inst Hosp Dev Strategy, China Hosp Dev Inst, Shanghai 200092, Peoples R China; [Yang, Junrui; Xie, Xiaoling; Zhang, Mingzhi] Shantou Univ, Joint Shantou Int Eye Ctr Shantou Univ & Chinese U, Med C…	Shanghai Jiao Tong University; Shanghai Jiao Tong University; Shantou University; University of Technology Sydney	Zheng, C (corresponding author), Shanghai Jiao Tong Univ, Xinhua Hosp, Sch Med, Dept Ophthalmol, Shanghai 200092, Peoples R China.;Zheng, C (corresponding author), Shanghai Jiao Tong Univ, Inst Hosp Dev Strategy, China Hosp Dev Inst, Shanghai 200092, Peoples R China.;Zhang, MZ (corresponding author), Shantou Univ, Joint Shantou Int Eye Ctr Shantou Univ & Chinese U, Med Coll, Shantou, Guangdong, P…	zmz@jsiec.org; zhengce@outlook.com	Huang, Danqing/ABC-9114-2021; Xie, Xiaoling/KOD-1857-2024	Xie, Xiaoling/0000-0003-1970-4537	Not applicable.	Not applicable.	Not applicable.		54	1	1	0	5	BMC	LONDON	CAMPUS, 4 CRINAN ST, LONDON N1 9XW, ENGLAND		1471-2415		BMC OPHTHALMOL	BMC Ophthalmol.	NOV 20	2023	23	1
J	Nikdel, M; Ghadimi, H; Tavakoli, M; Suh, DW				Nikdel, Mojgan; Ghadimi, Hadi; Tavakoli, Mehdi; Suh, Donny W.			Assessment of the Responses of the Artificial Intelligence-based Chatbot ChatGPT-4 to Frequently Asked Questions About Amblyopia and Childhood Myopia	JOURNAL OF PEDIATRIC OPHTHALMOLOGY & STRABISMUS			English	Article								Purpose: To assess the responses of the ChatGPT-4, the forerunner artificial intelligence-based chatbot, to frequently asked questions regarding two common pediatric ophthalmologic disorders, amblyopia and child-hood myopia.Methods: Twenty-seven questions about amblyopia and 28 questions about childhood myopia were asked of the ChatGPT twice (totally 110 questions). The responses were evaluated b…	[Nikdel, Mojgan; Ghadimi, Hadi] Atieh Med Ctr, Rasht, Iran; [Tavakoli, Mehdi] George Washington Univ, Sch Med & Hlth Sci, Dept Ophthalmol, Washington, DC USA; [Suh, Donny W.] Univ Calif Irvine, Gavin Herbert Eye Inst, Irvine, CA USA; [Suh, Donny W.] Univ Calif Irvine, Childrens Hosp Orange Cty, Irvine, CA USA; [Ghadimi, Hadi] Atieh Med Ctr, Rasht 4163915035, Iran	George Washington University; University of California System; University of California Irvine; Childrens Hospital of Orange County; University of California System; University of California Irvine	Ghadimi, H (corresponding author), Atieh Med Ctr, Rasht 4163915035, Iran.	hadi.ghadimi@gmail.com	Tavakoli, Mehdi/AAK-5142-2020						8	13	13	2	12	SLACK INC	THOROFARE	6900 GROVE RD, THOROFARE, NJ 08086 USA	0191-3913	1938-2405		J PEDIAT OPHTH STRAB	J. Pediatr. Ophthalmol. Strabismus.	MAR-APR	2024	61	2
J	Rojas-Carabali, W; Sen, A; Agarwal, A; Tan, GV; Cheung, CY; Rousselot, A; Agrawal, R; Liu, RE; Cifuentes-González, C; Elze, T; Kempen, JH; Sobrin, L; Nguyen, QD; de-la-Torre, A; Lee, B; Gupta, V; Agrawal, R				Rojas-Carabali, William; Sen, Alok; Agarwal, Aniruddha; Tan, Gavin; Cheung, Carol Y.; Rousselot, Andres; Agrawal, Rajdeep; Liu, Renee; Cifuentes-Gonzalez, Carlos; Elze, Tobias; Kempen, John H.; Sobrin, Lucia; Nguyen, Quan Dong; de-la-Torre, Alejandra; Lee, Bernett; Gupta, Vishali; Agrawal, Rupesh			Chatbots Vs. Human Experts: Evaluating Diagnostic Performance of Chatbots in Uveitis and the Perspectives on AI Adoption in Ophthalmology	OCULAR IMMUNOLOGY AND INFLAMMATION			English	Article						Artificial intelligence; ChatGPT; diagnosis; large language model; ophthalmology		PurposeTo assess the diagnostic performance of two chatbots, ChatGPT and Glass, in uveitis diagnosis compared to renowned uveitis specialists, and evaluate clinicians' perception about utilizing artificial intelligence (AI) in ophthalmology practice.MethodsSix cases were presented to uveitis experts, ChatGPT (version 3.5 and 4.0) and Glass 1.0, and diagnostic accuracy was analyzed. Additionally, …	[Rojas-Carabali, William; Agrawal, Rajdeep; Lee, Bernett; Agrawal, Rupesh] Nanyang Technol Univ, Lee Kong Chiang Sch Med, Singapore City, Singapore; [Sen, Alok] Sadguru Netra Chikitsalaya, Retina & Uvea Serv, Chitrakoot, India; [Agarwal, Aniruddha] Cleveland Clin, Eye Inst, Abu Dhabi, U Arab Emirates; [Agarwal, Aniruddha] Case Western Reserve Univ, Cleveland Clin Lerner Coll Med, Cleveland, OH US…	Nanyang Technological University; Cleveland Clinic Foundation; Cleveland Clinic Foundation; University System of Ohio; Case Western Reserve University; Maastricht University; Singapore National Eye Center; National University of Singapore; Chinese University of Hong Kong; Harvard University; Harvard University Medical Affiliates; Massachusetts Eye & Ear Infirmary; Harvard Medical School; Harvard …	Agrawal, R (corresponding author), Nanyang Technol Univ, Lee Kong Chiang Sch Med, Singapore City, Singapore.;Agrawal, R (corresponding author), Duke NUS Med Sch, Singapore City, Singapore.;Agrawal, R (corresponding author), Tan Tock Seng Hosp, Natl Healthcare Grp Eye Inst, Singapore City 308433, Singapore.	Rupesh_agrawal@ttsh.com.sg	Rojas-Carabali, William/IWE-3168-2023; Nguyen, Quan/JMP-5630-2023; Rousselot, Andres/AAS-8604-2021; Cheung, Carol/G-7895-2016; de-la-Torre, Alejandra/G-6436-2016; Cifuentes Gonzalez, Carlos Humberto/ACQ-8931-2022	Rojas-Carabali, William/0000-0002-9976-8989; Liu, Renee/0000-0003-4576-6918; Cifuentes Gonzalez, Carlos Humberto/0000-0002-2703-0977	We want to thank the Asia-Pacific Ocular Imaging Society (APOIS) and Zeiss for their support in the webinar organization.; Asia-Pacific Ocular Imaging Society; Zeiss	We want to thank the Asia-Pacific Ocular Imaging Society (APOIS) and Zeiss for their support in the webinar organization.; Asia-Pacific Ocular Imaging Society; Zeiss	We want to thank the Asia-Pacific Ocular Imaging Society (APOIS) and Zeiss for their support in the webinar organization.		13	12	12	4	9	TAYLOR & FRANCIS INC	PHILADELPHIA	530 WALNUT STREET, STE 850, PHILADELPHIA, PA 19106 USA	0927-3948	1744-5078		OCUL IMMUNOL INFLAMM	Ocul. Immunol. Inflamm.	SEP 13	2024	32	8
J	Rojas-Carabali, W; Cifuentes-González, C; Wei, X; Putera, I; Sen, A; Thng, ZX; Agrawal, R; Elze, T; Sobrin, L; Kempen, JH; Lee, BR; Biswas, J; Nguyen, QD; Gupta, V; de-la-Torre, A; Agrawal, R				Rojas-Carabali, William; Cifuentes-Gonzalez, Carlos; Wei, Xin; Putera, Ikhwanuliman; Sen, Alok; Thng, Zheng Xian; Agrawal, Rajdeep; Elze, Tobias; Sobrin, Lucia; Kempen, John H.; Lee, Bernett; Biswas, Jyotirmay; Nguyen, Quan Dong; Gupta, Vishali; de-la-Torre, Alejandra; Agrawal, Rupesh			Evaluating the Diagnostic Accuracy and Management Recommendations of ChatGPT in Uveitis	OCULAR IMMUNOLOGY AND INFLAMMATION			English	Article						Artificial intelligence; chatbot; diagnosis; natural language processing; ophthalmology		Introduction: Accurate diagnosis and timely management are vital for favorable uveitis outcomes. Artificial Intelligence (AI) holds promise in medical decision-making, particularly in ophthalmology. Yet, the diagnostic precision and management advice from AI-based uveitis chatbots lack assessment. Methods: We appraised diagnostic accuracy and management suggestions of an AI-based chatbot, ChatGPT…	[Rojas-Carabali, William; Wei, Xin; Thng, Zheng Xian; Lee, Bernett; de-la-Torre, Alejandra] Tan Tock Seng Hosp, Natl Healthcare Grp Eye Inst, Singapore, Singapore; [Rojas-Carabali, William; Agrawal, Rajdeep] Nanyang Technol Univ, Lee Kong Chiang Sch Med, Dept Bioinformat, Singapore, Singapore; [Cifuentes-Gonzalez, Carlos] Univ Rosario, Escuela Med & Ciencias Salud, Inst Translat Med IMT, Neurovit…	Tan Tock Seng Hospital; Nanyang Technological University; Universidad del Rosario; University of Indonesia; Erasmus University Rotterdam; Erasmus MC; Erasmus University Rotterdam; Erasmus MC; Erasmus University Rotterdam; Erasmus MC; Harvard University; Harvard University Medical Affiliates; Schepens Eye Research Institute; Addis Ababa University; Stanford University; Post Graduate Institute of M…	Agrawal, R (corresponding author), Tan Tock Seng Hosp, Natl Healthcare Grp Eye Inst, Singapore 308433, Singapore.	rupesh_agrawal@ttsh.com.sg	Rojas-Carabali, William/IWE-3168-2023; Nguyen, Quan/JMP-5630-2023; de-la-Torre, Alejandra/G-6436-2016; Cifuentes Gonzalez, Carlos Humberto/ACQ-8931-2022	Sobrin, Lucia/0000-0003-1575-0819; Putera, Ikhwanuliman/0000-0002-9350-5133; Cifuentes Gonzalez, Carlos Humberto/0000-0002-2703-0977; Rojas-Carabali, William/0000-0002-9976-8989; Kempen, John/0000-0002-2967-4792					19	24	24	1	2	TAYLOR & FRANCIS INC	PHILADELPHIA	530 WALNUT STREET, STE 850, PHILADELPHIA, PA 19106 USA	0927-3948	1744-5078		OCUL IMMUNOL INFLAMM	Ocul. Immunol. Inflamm.	SEP 13	2024	32	8
J	Delsoz, M; Raja, H; Madadi, Y; Tang, AA; Wirostko, BM; Kahook, MY; Yousefi, S				Delsoz, Mohammad; Raja, Hina; Madadi, Yeganeh; Tang, Anthony A.; Wirostko, Barbara M.; Kahook, Malik Y.; Yousefi, Siamak			The Use of ChatGPT to Assist in Diagnosing Glaucoma Based on Clinical Case Reports	OPHTHALMOLOGY AND THERAPY			English	Article						ChatGPT; Large language models (LLM); Artificial intelligence (AI); Glaucoma; Provisional diagnosis; Differential diagnosis	OPEN-ANGLE GLAUCOMA; OPTIC DISK SIZE; RISK-FACTORS; DIABETIC-RETINOPATHY; OCULAR HYPERTENSION; POPULATION; PREVALENCE	Introduction: The purpose of this study was to evaluate the capabilities of large language models such as Chat Generative Pretrained Transformer (ChatGPT) to diagnose glaucoma based on specific clinical case descriptions with comparison to the performance of senior ophthalmology resident trainees. Methods: We selected 11 cases with primary and secondary glaucoma from a publicly accessible online …	[Delsoz, Mohammad; Raja, Hina; Madadi, Yeganeh; Tang, Anthony A.; Yousefi, Siamak] Univ Tennessee, Hamilton Eye Inst, Dept Ophthalmol, Hlth Sci Ctr, 930 Madison Ave,Suite 471, Memphis, TN 38163 USA; [Wirostko, Barbara M.] Univ Utah, John Moran Eye Ctr, Salt Lake City, UT USA; [Kahook, Malik Y.] Univ Colorado, Sch Med, Dept Ophthalmol, Aurora, CO USA; [Yousefi, Siamak] Univ Tennessee, Ctr Hlth Sci…	University of Tennessee System; University of Tennessee Health Science Center; Utah System of Higher Education; University of Utah; University of Colorado System; University of Colorado Anschutz Medical Campus; University of Tennessee System; University of Tennessee Health Science Center	Yousefi, S (corresponding author), Univ Tennessee, Hamilton Eye Inst, Dept Ophthalmol, Hlth Sci Ctr, 930 Madison Ave,Suite 471, Memphis, TN 38163 USA.	siamak.yousefi@uthsc.edu	Madadi, Yeganeh/JUV-2768-2023; Raja, hina/AAR-5423-2021; Delsoz, Mohammad/IUP-1811-2023	Delsoz, Mohammad/0000-0001-5638-2034; Madadi, Yeganeh/0000-0003-4292-3404; Yousefi, Siamak/0000-0001-8633-5730	NIH [R01EY033005, R21EY031725]; Research to Prevent Blindness (RPB), New York; Hamilton Eye Institute	NIH(United States Department of Health & Human ServicesNational Institutes of Health (NIH) - USA); Research to Prevent Blindness (RPB), New York(Research to Prevent Blindness (RPB)); Hamilton Eye Institute	This work was supported by NIH Grants R01EY033005 (SY), R21EY031725 (SY), grants from Research to Prevent Blindness (RPB), New York (SY), and supports from the Hamilton Eye Institute (SY). The funders had no role in study design, data collection and analysis, decision to publish, or preparation of the manuscript. Publication for this submission, including the journal's Rapid Service Fee, was fund…		27	57	57	13	31	SPRINGER INT PUBL AG	CHAM	GEWERBESTRASSE 11, CHAM, CH-6330, SWITZERLAND	2193-8245	2193-6528		OPHTHALMOL THER	OPHTHALMOL. THER.	DEC	2023	12	6
J	Lim, ZW; Pushpanathan, K; Yew, SME; Lai, Y; Sun, CH; Lam, JSH; Chen, DZ; Goh, JHL; Tan, MCJ; Sheng, B; Cheng, CY; Koh, VTC; Tham, YC				Lim, Zhi Wei; Pushpanathan, Krithi; Yew, Samantha Min Er; Lai, Yien; Sun, Chen-Hsin; Lam, Janice Sing Harn; Chen, David Ziyou; Goh, Jocelyn Hui Lin; Tan, Marcus Chun Jin; Sheng, Bin; Cheng, Ching-Yu; Koh, Victor Teck Chang; Tham, Yih-Chung			Benchmarking large language models' performances for myopia care: a comparative analysis of ChatGPT-3.5, ChatGPT-4.0, and Google Bard	EBIOMEDICINE			English	Article						ChatGPT-4.0; ChatGPT-3.5; Google Bard; Chatbot; Myopia; Large language models	PREVENTION; ATROPINE	Background Large language models (LLMs) are garnering wide interest due to their human-like and contextually relevant responses. However, LLMs' accuracy across specific medical domains has yet been thoroughly evaluated. Myopia is a frequent topic which patients and parents commonly seek information online. Our study evaluated the performance of three LLMs namely ChatGPT-3.5, ChatGPT-4.0, and Goog…	[Lim, Zhi Wei; Pushpanathan, Krithi; Yew, Samantha Min Er; Lai, Yien; Sun, Chen-Hsin; Lam, Janice Sing Harn; Chen, David Ziyou; Tan, Marcus Chun Jin; Cheng, Ching-Yu; Koh, Victor Teck Chang; Tham, Yih-Chung] Natl Univ Singapore, Yong Loo Lin Sch Med, Level 13,MD1 Tahir Fdn Bldg,12 Sci Dr 2, Singapore 117549, Singapore; [Pushpanathan, Krithi; Yew, Samantha Min Er; Lai, Yien; Sun, Chen-Hsin; Lam, J…	National University of Singapore; National University of Singapore; National University of Singapore; National University of Singapore; National University of Singapore; Singapore National Eye Center; Shanghai Jiao Tong University; Shanghai Jiao Tong University; Shanghai Jiao Tong University; National University of Singapore	Tham, YC (corresponding author), Natl Univ Singapore, Yong Loo Lin Sch Med, Level 13,MD1 Tahir Fdn Bldg,12 Sci Dr 2, Singapore 117549, Singapore.	thamyc@nus.edu.sg	Tham, Yih Chung/IUP-0091-2023; Chen, David/ABF-6773-2020; Pushpanathan, Krithi/AAD-3746-2022; Lim, Zhiwei/Q-7858-2016; Cheng, Chingyu/ADB-9835-2022; Sheng, Bin/LMO-9532-2024	Sheng, Bin/0000-0001-8678-2784; Pushpanathan, Krithi/0000-0001-6263-8489; Tan, Marcus Chun Jin/0000-0002-4849-6194; Chen, David/0000-0002-2153-3100	National Medical Research Council of Singapore [NMRC/MOH/HCSAINV21nov-0001]	National Medical Research Council of Singapore(National Medical Research Council, Singapore)	Funding Dr Yih-Chung Tham was supported by the National Medical Research Council of Singapore (NMRC/MOH/HCSAINV21nov-0001) .		58	135	138	45	183	ELSEVIER	AMSTERDAM	RADARWEG 29, 1043 NX AMSTERDAM, NETHERLANDS	2352-3964			EBIOMEDICINE	EBioMedicine	SEP	2023	95
J	Biswas, S; Logan, NS; Davies, LN; Sheppard, AL; Wolffsohn, JS				Biswas, Sayantan; Logan, Nicola S. S.; Davies, Leon N. N.; Sheppard, Amy L. L.; Wolffsohn, James S. S.			Assessing the utility of ChatGPT as an artificial intelligence-based large language model for information to answer questions on myopia	OPHTHALMIC AND PHYSIOLOGICAL OPTICS			English	Article						artificial intelligence; ChatGPT; chatbot response; myopia; patient information	PREVALENCE; OUTDOORS; ERA	Purpose: ChatGPT is an artificial intelligence language model, which uses natural language processing to simulate human conversation. It has seen a wide range of applications including healthcare education, research and clinical practice. This study evaluated the accuracy of ChatGPT in providing accurate and quality information to answer questions on myopia.Methods: A series of 11 questions (nine…	[Biswas, Sayantan; Logan, Nicola S. S.; Davies, Leon N. N.; Sheppard, Amy L. L.; Wolffsohn, James S. S.] Aston Univ, Coll Hlth & Life Sci, Sch Optometry, Birmingham, England	Aston University	Biswas, S (corresponding author), Aston Univ, Coll Hlth & Life Sci, Sch Optometry, Birmingham, England.	s.biswas2@aston.ac.uk	Wolffsohn, James/KEH-3192-2024; Logan, Nicola/ABC-9102-2020; Biswas, Sayantan/AAR-8256-2021	Logan, Nicola S/0000-0002-0538-9516; Wolffsohn, James/0000-0003-4673-8927; Sheppard, Amy/0000-0003-0035-8267; Biswas, Sayantan/0000-0001-6011-0365					34	45	46	11	61	WILEY	HOBOKEN	111 RIVER ST, HOBOKEN 07030-5774, NJ USA	0275-5408	1475-1313		OPHTHAL PHYSL OPT	Ophthalmic Physiol. Opt.	NOV	2023	43	6
J	Singh, S; Djalilian, A; Ali, MJ				Singh, Swati; Djalilian, Ali; Ali, Mohammad Javed			ChatGPT and Ophthalmology: Exploring Its Potential with Discharge Summaries and Operative Notes	SEMINARS IN OPHTHALMOLOGY			English	Article						Chatbot; chatGPT; cornea; glaucoma; lacrimal; large language models; LLM; ophthalmology; retina; strabismus		Purpose: This study aimed to report the abilities of the large language model ChatGPT(R) (OpenAI, San Francisco, USA) in constructing ophthalmic discharge summaries and operative notes. Methods: A set of prompts was constructed through statements incorporating common ophthalmic surgeries across the subspecialties of the cornea, retina, glaucoma, paediatric ophthalmology, neuroophthalmology, and o…	[Singh, Swati] LV Prasad Eye Inst, Ophthalm Plast Surg Serv, Hyderabad, India; [Djalilian, Ali] Univ Illinois, Dept Ophthalmol, Chicago, IL USA; [Ali, Mohammad Javed] LV Prasad Eye Inst, Govindram Seksaria Inst Dacryol, Hyderabad, India; [Ali, Mohammad Javed] LV Prasad Eye Inst, Govindram Seksaria Inst Dacryol, Rd 2,Banjara Hills, Hyderabad, India	L. V. Prasad Eye Institute; University of Illinois System; University of Illinois Chicago; University of Illinois Chicago Hospital; L. V. Prasad Eye Institute; L. V. Prasad Eye Institute	Ali, MJ (corresponding author), LV Prasad Eye Inst, Govindram Seksaria Inst Dacryol, Rd 2,Banjara Hills, Hyderabad, India.	drjaved007@gmail.com	Singh, Swati/AAD-1872-2019	Ali, Mohammad Javed/0000-0002-6363-9202; singh, swati/0000-0001-7420-9438					13	87	88	9	30	TAYLOR & FRANCIS INC	PHILADELPHIA	530 WALNUT STREET, STE 850, PHILADELPHIA, PA 19106 USA	0882-0538	1744-5205		SEMIN OPHTHALMOL	Semin. Ophthalmol.	JUL 4	2023	38	5
J	Sun, Y; Li, Y; Zhang, FJ; Zhao, H; Liu, HR; Wang, NL; Li, HQ				Sun, Yun; Li, Yu; Zhang, Fengju; Zhao, He; Liu, Hanruo; Wang, Ningli; Li, Huiqi			A deep network using coarse clinical prior for myopic maculopathy grading	COMPUTERS IN BIOLOGY AND MEDICINE			English	Article						Pathological myopia; Convolutional neural network; Fundus images; Myopic maculopathy	PATHOLOGICAL MYOPIA; CLASSIFICATION; PREVALENCE; IMAGES	Pathological Myopia (PM) is a globally prevalent eye disease which is one of the main causes of blindness. In the long-term clinical observation, myopic maculopathy is a main criterion to diagnose PM severity. The grading of myopic maculopathy can provide a severity and progression prediction of PM to perform treatment and prevent myopia blindness in time. In this paper, we propose a feature fusi…	[Sun, Yun; Zhao, He; Liu, Hanruo; Li, Huiqi] Beijing Inst Technol, 5 Zhong Guan Cun South St, Beijing 100081, Peoples R China; [Li, Yu; Zhang, Fengju; Liu, Hanruo; Wang, Ningli] Capital Med Univ, Beijing Tongren Hosp, 2 Chongwenmennei St, Beijing 100730, Peoples R China	Beijing Institute of Technology; Capital Medical University	Zhao, H; Li, HQ (corresponding author), Beijing Inst Technol, 5 Zhong Guan Cun South St, Beijing 100081, Peoples R China.	zhaohe@bit.edu.cn; huiqili@bit.edu.cn	SUN, YUN/GWU-6190-2022; zhao, he/JEO-8161-2023; Li, Huiqi/MGT-3364-2025		National Natural Science Foundation of China (NSFC) [82072007]; China Postdoctoral Science Foundation [2020M680387]; Research and Transforma-tion Application of Capital Clinical Diagnosis and Treatment Technol-ogy by Beijing Municipal Commission of Science and Technology [Z201100005520043]	National Natural Science Foundation of China (NSFC)(National Natural Science Foundation of China (NSFC)); China Postdoctoral Science Foundation(China Postdoctoral Science Foundation); Research and Transforma-tion Application of Capital Clinical Diagnosis and Treatment Technol-ogy by Beijing Municipal Commission of Science and Technology	Acknowledgments This research work is supported by the National Natural Science Foundation of China (NSFC) (Grant No. 82072007) , China Postdoctoral Science Foundation (No. 2020M680387) and Research and Transforma-tion Application of Capital Clinical Diagnosis and Treatment Technol-ogy by Beijing Municipal Commission of Science and Technology (No. Z201100005520043) .		65	12	12	3	18	PERGAMON-ELSEVIER SCIENCE LTD	OXFORD	THE BOULEVARD, LANGFORD LANE, KIDLINGTON, OXFORD OX5 1GB, ENGLAND	0010-4825	1879-0534		COMPUT BIOL MED	Comput. Biol. Med.	MAR	2023	154
J	Lee, YM; Bacchi, S; Macri, C; Tan, YR; Casson, R; Chan, WO				Lee, Yong Min; Bacchi, Stephen; Macri, Carmelo; Tan, Yiran; Casson, Robert; Chan, Weng Onn			Ophthalmology Operation Note Encoding with Open-Source Machine Learning and Natural Language Processing	OPHTHALMIC RESEARCH			English	Article						Machine learning; Natural language processing; Operation note; Procedural coding; Electronic medical records		Introduction: Accurate assignment of procedural codes has important medico-legal, academic, and economic purposes for healthcare providers. Procedural coding requires accurate documentation and exhaustive manual labour to interpret complex operation notes. Ophthalmology operation notes are highly specialised making the process time-consuming and challenging to implement. This study aimed to devel…	[Lee, Yong Min; Bacchi, Stephen; Macri, Carmelo; Tan, Yiran; Casson, Robert; Chan, Weng Onn] Royal Adelaide Hosp, Adelaide, SA, Australia; [Lee, Yong Min; Bacchi, Stephen; Macri, Carmelo; Tan, Yiran; Casson, Robert; Chan, Weng Onn] Univ Adelaide, Machine Learning Div, Ophthalm Res Lab, Adelaide, SA, Australia	Royal Adelaide Hospital; University of Adelaide	Lee, YM (corresponding author), Royal Adelaide Hosp, Adelaide, SA, Australia.;Lee, YM (corresponding author), Univ Adelaide, Machine Learning Div, Ophthalm Res Lab, Adelaide, SA, Australia.	yongmin.shane.lee@gmail.com	chan, weng/AAD-4432-2022; casson, robert/D-1561-2013	Macri, Carmelo/0000-0002-1110-3780; Bacchi, Stephen/0000-0001-5130-8628					36	2	3	0	0	KARGER	BASEL	ALLSCHWILERSTRASSE 10, CH-4009 BASEL, SWITZERLAND	0030-3747	1423-0259		OPHTHALMIC RES	Ophthalmic Res.		2023	66	1
J	Yu, ZH; Yang, X; Sweeting, GL; Ma, YH; Stolte, SE; Fang, RG; Wu, YH				Yu, Zehao; Yang, Xi; Sweeting, Gianna L.; Ma, Yinghan; Stolte, Skylar E.; Fang, Ruogu; Wu, Yonghui			Identify diabetic retinopathy-related clinical concepts and their attributes using transformer-based natural language processing methods	BMC MEDICAL INFORMATICS AND DECISION MAKING			English	Article; Proceedings Paper	4th International Workshop on Health Natural Language Processing (HealthNLP)	AUG09, 2021	ELECTR NETWORK			Diabetic retinopathy; Natural language processing; Named entity recognition; Deep learning; Relation extraction	IDENTIFICATION; DIAGNOSIS	Background Diabetic retinopathy (DR) is a leading cause of blindness in American adults. If detected, DR can be treated to prevent further damage causing blindness. There is an increasing interest in developing artificial intelligence (AI) technologies to help detect DR using electronic health records. The lesion-related information documented in fundus image reports is a valuable resource that c…	[Yu, Zehao; Yang, Xi; Ma, Yinghan; Wu, Yonghui] Univ Florida, Coll Med, Dept Hlth Outcomes & Biomed Informat, Gainesville, FL 32611 USA; [Sweeting, Gianna L.; Stolte, Skylar E.; Fang, Ruogu] Univ Florida, Coll Engn, Dept Biomed Engn, Gainesville, FL 32611 USA	State University System of Florida; University of Florida; State University System of Florida; University of Florida	Wu, YH (corresponding author), Univ Florida, Coll Med, Dept Hlth Outcomes & Biomed Informat, Gainesville, FL 32611 USA.	yonghui.wu@ufl.edu	Fang, Ruogu/AAY-8923-2020; ma, yinghan/KEE-8730-2024	yu, zehao/0000-0002-7290-8005; Fang, Ruogu/0000-0003-3980-3532	Patient-Centered Outcomes Research Institute(R) (PCORI(R)) Award [ME-2018C3-14754]; National Institute on Aging [1R56AG 069880]; UF Informatics Institute [00129436]; National Institute on Aging [R56AG069880] Funding Source: NIH RePORTER	Patient-Centered Outcomes Research Institute(R) (PCORI(R)) Award(Patient-Centered Outcomes Research Institute (PCORI)); National Institute on Aging(United States Department of Health & Human ServicesNational Institutes of Health (NIH) - USANIH National Institute on Aging (NIA)); UF Informatics Institute; National Institute on Aging(United States Department of Health & Human ServicesNational Insti…	This project was partially supported by a Patient-Centered Outcomes Research Institute (R) (PCORI (R)) Award (ME-2018C3-14754), a grant from National Institute on Aging 1R56AG 069880, and a SEED Grant from the UF Informatics Institute (00129436). The content is solely the responsibility of the authors and does not necessarily represent the official views of the funding institutions.		36	4	5	4	21	BMC	LONDON	CAMPUS, 4 CRINAN ST, LONDON N1 9XW, ENGLAND		1472-6947		BMC MED INFORM DECIS	BMC Med. Inform. Decis. Mak.	SEP 27	2022	22	SUPPL 3
J	Hu, W; Wang, SY				Hu, Wendeng; Wang, Sophia Y.			Predicting Glaucoma Progression Requiring Surgery Using Clinical Free-Text Notes and Transfer Learning With Transformers	TRANSLATIONAL VISION SCIENCE & TECHNOLOGY			English	Article						glaucoma; free-text clinical notes; machine learning; natural language processing; BERT; transfer learning; deep learning	VISUAL-FIELD; RISK-FACTORS; TRABECULECTOMY; OUTCOMES; MODEL	Purpose: We evaluated the use of massive transformer-based language models to predict glaucoma progression requiring surgery using ophthalmology clinical notes from electronic health records (EHRs). Methods: Ophthalmology clinical notes for 4512 glaucoma patients at a single center from 2008 to 2020 were identified fromthe EHRs. Four different pre-trained Bidirectional Encoder Representations fro…	[Hu, Wendeng; Wang, Sophia Y.] Stanford Univ, Byers Eye Inst, Dept Ophthalmol, Sch Med, Palo Alto, CA USA	Stanford University	Wang, SY (corresponding author), Stanford Univ, Byers Eye Inst, Dept Ophthalmol, Sch Med, 2452 Watson Court, Palo Alto, CA 94304 USA.	sywang@stanford.edu		Wang, Sophia/0000-0003-0916-9403	National Eye Institute [P30-EY026877, 1K23EY03263501]; Research to Prevent Blindness	National Eye Institute(United States Department of Health & Human ServicesNational Institutes of Health (NIH) - USANIH National Eye Institute (NEI)); Research to Prevent Blindness(Research to Prevent Blindness (RPB))	Supported by a grant from the National Eye Institute (1K23EY03263501 to SYW), a Career Development Award from Research to Prevent Blindness (SYW), an unrestricted departmental grant from Research to Prevent Blindness (SYW and WH), and a departmental grant from the National Eye Institute (P30-EY026877 to SYW and WH).		31	21	23	2	14	ASSOC RESEARCH VISION OPHTHALMOLOGY INC	ROCKVILLE	12300 TWINBROOK PARKWAY, ROCKVILLE, MD 20852-1606 USA	2164-2591			TRANSL VIS SCI TECHN	Transl. Vis. Sci. Technol.	MAR	2022	11	3
J	Holz, FG; Schmitz-Valckenberg, S; Wolf, A; Agostini, H; Lorenz, K; Pielen, A; Feltgen, N; Guthoff, R; Quiering, C; Clemens, A; Jaeger, K				Holz, F. G.; Schmitz-Valckenberg, Steffen; Wolf, A.; Agostini, H.; Lorenz, K.; Pielen, A.; Feltgen, N.; Guthoff, R.; Quiering, C.; Clemens, A.; Jaeger, K.			A randomized, open-label, multicenter study of switching to brolucizumab with or without a loading dose for patients with suboptimal anatomically controlled neovascular age-related macular degeneration-the FALCON study	GRAEFES ARCHIVE FOR CLINICAL AND EXPERIMENTAL OPHTHALMOLOGY			English	Article						Neovascular age-related macular degeneration; Anti-VEGF; Brolucizumab; Switch	TREAT-AND-EXTEND; RANIBIZUMAB; BLINDNESS	Background Treatment initiation with brolucizumab, a new potent anti-vascular endothelial growth factor (VEGF) agent, is typically performed with three monthly injections (loading dose) and has been well studied in treatment-naive patients. However, no clinical data are available yet on whether or not anti-VEGF pretreated patients also benefit from a loading dose. In the clinical setting, differe…	[Holz, F. G.; Schmitz-Valckenberg, Steffen] Univ Bonn, Dept Ophthalmol, Bonn, Germany; [Holz, F. G.; Schmitz-Valckenberg, Steffen] Univ Bonn, GRADE Reading Ctr, Bonn, Germany; [Schmitz-Valckenberg, Steffen] Univ Utah, John A Moran Eye Ctr, Dept Ophthalmol & Visual Sci, 65 North Mario Capecchi Dr, Salt Lake City, UT 84312 USA; [Wolf, A.] Univ Ulm, Dept Ophthalmol, Ulm, Germany; [Agostini, H.] Univ…	University of Bonn; University of Bonn; Utah System of Higher Education; University of Utah; Ulm University; University of Freiburg; Johannes Gutenberg University of Mainz; Hannover Medical School; University of Gottingen; Novartis; Novartis Germany; Novartis; Universitats Herzzentrum Freiburg; University of Freiburg	Schmitz-Valckenberg, S (corresponding author), Univ Bonn, Dept Ophthalmol, Bonn, Germany.;Schmitz-Valckenberg, S (corresponding author), Univ Bonn, GRADE Reading Ctr, Bonn, Germany.;Schmitz-Valckenberg, S (corresponding author), Univ Utah, John A Moran Eye Ctr, Dept Ophthalmol & Visual Sci, 65 North Mario Capecchi Dr, Salt Lake City, UT 84312 USA.	steffen.valckenberg@utah.edu			Novartis Pharma GmbH, Nuernberg, Germany; Projekt DEAL	Novartis Pharma GmbH, Nuernberg, Germany; Projekt DEAL	Open Access funding enabled and organized by Projekt DEAL. The study is funded by the Novartis Pharma GmbH, Nuernberg, Germany.		23	10	10	0	4	SPRINGER	NEW YORK	ONE NEW YORK PLAZA, SUITE 4600, NEW YORK, NY, UNITED STATES	0721-832X	1435-702X		GRAEF ARCH CLIN EXP	Graefes Arch. Clin. Exp. Ophthalmol.	AUG	2022	260	8
J	Hemelings, R; Elen, B; Blaschko, MB; Jacob, J; Stalmans, I; De Boever, P				Hemelings, Ruben; Elen, Bart; Blaschko, Matthew B.; Jacob, Julie; Stalmans, Ingeborg; De Boever, Patrick			Pathological myopia classification with simultaneous lesion segmentation using deep learning	COMPUTER METHODS AND PROGRAMS IN BIOMEDICINE			English	Article						Pathological myopia; fovea localization; peripapillary atrophy; retinal detachment; convolutional neural network; fundus image; glaucoma	OPTIC DISC; PARAPAPILLARY ATROPHY; PERIPAPILLARY ATROPHY; PREVALENCE; PROGRESSION; RETINOPATHY; BETA	Background and Objectives: Pathological myopia (PM) is the seventh leading cause of blindness, with a reported global prevalence up to 3%. Early and automated PM detection from fundus images could aid to prevent blindness in a world population that is characterized by a rising myopia prevalence. We aim to assess the use of convolutional neural networks (CNNs) for the detection of PM and semantic …	[Hemelings, Ruben; Stalmans, Ingeborg] Katholieke Univ Leuven, Res Grp Ophthalmol, Herestr 49, B-3000 Leuven, Belgium; [Jacob, Julie; Stalmans, Ingeborg] UZ Leuven, Ophthalmol Dept, Herestr 49, B-3000 Leuven, Belgium; [Blaschko, Matthew B.] Katholieke Univ Leuven, ESAT PSI, Kasteelpk Arenberg 10, B-3001 Leuven, Belgium; [De Boever, Patrick] Hasselt Univ, Agoralaan Bldg D, B-3590 Diepenbeek, Belgi…	KU Leuven; KU Leuven; University Hospital Leuven; KU Leuven; Hasselt University; VITO	Hemelings, R (corresponding author), Katholieke Univ Leuven, VITO, Vito Hlth, Ind Zone Vlasmeer 7, B-2400 Mol, Belgium.	ruben.hemelings@kuleuven.be	Elen, Bart/KGK-5368-2024; De Boever, Patrick/AAA-8387-2019	Blaschko, Matthew/0000-0002-2640-181X; Elen, Bart/0000-0002-6900-3512; De Boever, Patrick/0000-0002-5197-8215; Jacob, Julie/0000-0002-4716-6820; Stalmans, Ingeborg/0000-0001-7507-4512	Research Group Ophthalmology; VITO NV; Flemish Government; KU Leuven	Research Group Ophthalmology; VITO NV; Flemish Government; KU Leuven(KU Leuven)	The first author is jointly supported by the Research Group Ophthalmology, KU Leuven and VITO NV. This research received funding from the Flemish Government under the Onderzoeksprogramma Artificiele Intelligentie (AI) Vlaanderen programme. No outside entities have been involved in the study design, in the collection, analysis and interpretation of data, in the writing of the manuscript, nor in th…		47	41	44	3	43	ELSEVIER IRELAND LTD	CLARE	ELSEVIER HOUSE, BROOKVALE PLAZA, EAST PARK SHANNON, CO, CLARE, 00000, IRELAND	0169-2607	1872-7565		COMPUT METH PROG BIO	Comput. Meth. Programs Biomed.	FEB	2021	199
J	Son, J; Kim, J; Kong, ST; Jung, KH				Son, Jaemin; Kim, Jaeyoung; Kong, Seo Taek; Jung, Kyu-Hwan			Leveraging the Generalization Ability of Deep Convolutional Neural Networks for Improving Classifiers for Color Fundus Photographs	APPLIED SCIENCES-BASEL			English	Article						diabetic retinopathy; pathologic myopia; classification; retinal image analysis; fundus image; deep convolutional neural network; Semi-supervised learning	INTEROBSERVER VARIABILITY; LEARNING ALGORITHM	Featured Application The proposed methods can accelerate labeling and training processes by mitigating malicious effects of noisy labels. Deep learning demands a large amount of annotated data, and the annotation task is often crowdsourced for economic efficiency. When the annotation task is delegated to non-experts, the dataset may contain data with inaccurate labels. Noisy labels not only yield…	[Son, Jaemin; Kong, Seo Taek; Jung, Kyu-Hwan] VUNO Inc, Seoul 06709, South Korea; [Kim, Jaeyoung] Genesis Lab Inc, Seoul 04538, South Korea		Jung, KH (corresponding author), VUNO Inc, Seoul 06709, South Korea.	woalsdnd@vuno.co; jy.kim@genesislab.ai; stkong@vuno.co; khwan.jung@vuno.co	Jung, Kyu-Hwan/AFF-6806-2022; Son, Jaemin/GQQ-8857-2022	Jung, Kyu-Hwan/0000-0002-6626-6800					36	4	4	1	8	MDPI	BASEL	ST ALBAN-ANLAGE 66, CH-4052 BASEL, SWITZERLAND		2076-3417		APPL SCI-BASEL	Appl. Sci.-Basel	JAN	2021	11	2
J	Sramka, M; Slovak, M; Tuckova, J; Stodulka, P				Sramka, Martin; Slovak, Martin; Tuckova, Jana; Stodulka, Pavel			Improving clinical refractive results of cataract surgery by machine learning	PEERJ			English	Article						Machine learning; Cataract surgery; IOL calculation; Support vector machine; Artificial neural networks; Cataract; Refractive results	INTRAOCULAR-LENS POWER; RADIAL-BASIS-FUNCTION; NEURAL-NETWORK; CALCULATION FORMULAS; PURSUING PERFECTION; ACCURACY; PHACOEMULSIFICATION; PREDICTION; UNIVERSAL; BIOMETRY	Aim: To evaluate the potential of the Support Vector Machine Regression model (SVM-RM) and Multilayer Neural Network Ensemble model (MLNN-EM) to improve the intraocular lens (IOL) power calculation for clinical workflow. Background: Current IOL power calculation methods are limited in their accuracy with the possibility of decreased accuracy especially in eyes with an unusual ocular dimension. In…	[Sramka, Martin; Tuckova, Jana] Czech Tech Univ, Fac Elect Engn, Dept Circuit Theory, Prague, Czech Republic; [Sramka, Martin; Slovak, Martin; Stodulka, Pavel] Gemini Eye Clin, Dept Res & Dev, Zlin, Czech Republic; [Stodulka, Pavel] Charles Univ Prague, Fac Med 3, Dept Ophthalmol, Prague, Czech Republic	Czech Technical University Prague; Charles University Prague	Sramka, M (corresponding author), Czech Tech Univ, Fac Elect Engn, Dept Circuit Theory, Prague, Czech Republic.;Sramka, M (corresponding author), Gemini Eye Clin, Dept Res & Dev, Zlin, Czech Republic.	sramka@gemini.cz	Slovak, Martin/AAF-5397-2021; Stodulka, Pavel/AAG-8303-2021; Sramka, Martin/O-1360-2019; Sramka, Martin/G-9619-2016	Slovak, Martin/0009-0004-2166-4401; Sramka, Martin/0000-0003-0927-4828					80	34	39	6	24	PEERJ INC	LONDON	341-345 OLD ST, THIRD FLR, LONDON, EC1V 9LL, ENGLAND	2167-8359			PEERJ	PeerJ	JUL 2	2019	7
J	Elam, AR; Blachley, TS; Stein, JD				Elam, Angela R.; Blachley, Taylor S.; Stein, Joshua D.			Geographic Variation in the Use of Diagnostic Testing of Patients with Newly Diagnosed Open-Angle Glaucoma	OPHTHALMOLOGY			English	Article							PREFERRED PRACTICE PATTERNS; VISUAL-FIELD LOSS; CLAIMS DATA; CARE; CONFORMANCE; POPULATION; ARTIFACTS; DISEASE; TRENDS	Purpose: To determine the extent of geographic variation in the proportion of patients with newly diagnosed open-angle glaucoma (OAG) undergoing visual field (VF) testing, fundus photography (FP), and other ocular imaging (OOI) among patients residing in different US communities. Design: Retrospective, longitudinal cohort study. Participants: All enrollees with newly diagnosed OAG enrolled in a m…	[Elam, Angela R.; Blachley, Taylor S.; Stein, Joshua D.] Univ Michigan, Sch Med, Dept Ophthalmol & Visual Sci, Ann Arbor, MI 48105 USA; [Stein, Joshua D.] Univ Michigan, Inst Healthcare Policy & Innovat, Ann Arbor, MI 48105 USA; [Stein, Joshua D.] Univ Michigan, Sch Publ Hlth, Dept Hlth Management & Policy, Ann Arbor, MI 48105 USA	University of Michigan System; University of Michigan; University of Michigan System; University of Michigan; University of Michigan System; University of Michigan	Stein, JD (corresponding author), Univ Michigan, WK Kellogg Eye Ctr, Dept Ophthalmol & Visual Sci, 1000 Wall St, Ann Arbor, MI 48105 USA.	jdstein@med.umich.edu		Stein, Joshua/0000-0003-2937-6987; Elam, Angela/0000-0003-2493-0651	National Eye Institute K23 Mentored Clinician Scientist Award [1K23EY019511]; Research to Prevent Blindness Physician Scientist Award	National Eye Institute K23 Mentored Clinician Scientist Award(United States Department of Health & Human ServicesNational Institutes of Health (NIH) - USANIH National Eye Institute (NEI)); Research to Prevent Blindness Physician Scientist Award	Financial support received from the National Eye Institute K23 Mentored Clinician Scientist Award (1K23EY019511, to J.D.S.) and a Research to Prevent Blindness Physician Scientist Award.		27	18	18	0	1	ELSEVIER SCIENCE INC	NEW YORK	360 PARK AVE SOUTH, NEW YORK, NY 10010-1710 USA	0161-6420	1549-4713		OPHTHALMOLOGY	Ophthalmology	MAR	2016	123	3
J	Dersu, II; Ali, TK; Spencer, HJ; Covey, SM; Evans, MS; Harper, RA				Dersu, Inci I.; Ali, Tayyeba K.; Spencer, Horace J.; Covey, Sarah M.; Evans, Megan S.; Harper, Richard A.			Psychomotor Vigilance and Visual Field Test Performance	SEMINARS IN OPHTHALMOLOGY			English	Article						Reliability; Self-Assesment of performance; survey; visual field test; Walter Reed Palm-Held Psychomotor Vigilance Test	AUTOMATED PERIMETRY; GLAUCOMA; EXPERIENCE	Introduction: Visual field test is an invaluable tool to evaluate the detection and progression of glaucoma. On the other hand, as a subjective test, reliable results depend on patients' optimum performance including vigilance during the test. The purpose of this study was to understand patient's attitude and preferences about the visual field test taking, and in addition to assess the relationsh…	[Dersu, Inci I.; Ali, Tayyeba K.; Covey, Sarah M.; Evans, Megan S.; Harper, Richard A.] Jones Eye Inst, Dept Ophthalmol, Little Rock, AR USA; [Spencer, Horace J.] Univ Arkansas Med Sci, Fay W Boozman Coll Publ Hlth, Little Rock, AR 72205 USA	University of Arkansas System; University of Arkansas Medical Sciences	Dersu, II (corresponding author), Univ Arkansas Med Sci, Dept Ophthalmol, Jones Eye Inst, 4301 W Markham St,Slot 523, Little Rock, AR 72205 USA.	dersuinci@yahoo.com		Spencer, Horace/0000-0001-8176-881X; Evans, Megan/0000-0001-7491-1673	Research to Prevent Blindness; Pat and Willard Walker Eye Research Center	Research to Prevent Blindness(Research to Prevent Blindness (RPB)); Pat and Willard Walker Eye Research Center	Grants were obtained from Research to Prevent Blindness and Pat and Willard Walker Eye Research Center. The funding organizations had no role in the design or conduct of this research.		17	5	5	1	8	TAYLOR & FRANCIS INC	PHILADELPHIA	530 WALNUT STREET, STE 850, PHILADELPHIA, PA 19106 USA	0882-0538	1744-5205		SEMIN OPHTHALMOL	Semin. Ophthalmol.	JUL	2015	30	4
J	Labeille, E; Burillon, C; Cornut, PL				Labeille, Elodie; Burillon, Carole; Cornut, Pierre-Loic			Pars plana vitrectomy combined with iris-claw intraocular lens implantation for lens nucleus and intraocular lens dislocation	JOURNAL OF CATARACT AND REFRACTIVE SURGERY			English	Article							CLINICAL-FEATURES; CAPSULAR SUPPORT; FOLLOW-UP; FRAGMENTS; OUTCOMES; PHACOEMULSIFICATION; APHAKIA; MANAGEMENT; CATARACTS; FIXATION	PURPOSE: To assess the medium-term efficacy and safety of treating nucleus and intraocular lens (100 dislocation with pars plana vitrectomy (PPV) combined with iris-claw IOL implantation. SETTING: Department of Ophthalmology, University of Lyon 1 Claude Bernard, Lyon, France. DESIGN: Retrospective case series. METHODS: The study comprised consecutive patients without capsule support having PPV co…	[Labeille, Elodie; Cornut, Pierre-Loic] L Hussel Hosp, Dept Ophthalmol, Vienne, France; [Burillon, Carole; Cornut, Pierre-Loic] Univ Lyon 1, Hosp Civils Lyon, E Herriot Hosp, F-69365 Lyon, France; [Cornut, Pierre-Loic] Pole Vis Val Ouest, F-69130 Ecully, France	Universite Claude Bernard Lyon 1; CHU Lyon	Cornut, PL (corresponding author), Pole Vis Val Ouest, Dept Ophtalmol, 39 Chemin Vernique, F-69130 Ecully, France.	dr.cornut@gmail.com			Bibliotheque Scientifique de 400 euros l'Association Generale de l'Internat de Lyon	Bibliotheque Scientifique de 400 euros l'Association Generale de l'Internat de Lyon	Funding for English corrections by the Bibliotheque Scientifique de 400 euros l'Association Generale de l'Internat de Lyon.		30	16	16	0	2	ELSEVIER SCIENCE INC	NEW YORK	360 PARK AVE SOUTH, NEW YORK, NY 10010-1710 USA	0886-3350	1873-4502		J CATARACT REFR SURG	J. Cataract. Refract. Surg.	SEP	2014	40	9
J	Modi, Y; John, V; Warman, R; Hess, D; Murray, TG; Berrocal, AM				Modi, Yasha; John, Vishak; Warman, Roberto; Hess, Ditte; Murray, Timothy G.; Berrocal, Audina M.			Retained subretinal date palm tree thorn in a child	JOURNAL OF AAPOS			English	Article							INTRARETINAL FOREIGN-BODIES; MANAGEMENT	A 3-year-old boy presented with severe eye pain and nausea after colliding with a date palm tree branch. Examination under anesthesia revealed a self-sealed corneal laceration and traumatic cataract in his left eye. Cultures were taken and the patient received prophylactic subconjunctival, intravitreal, and systemic antibiotics because of the high risk of endophthalmitis. A thorn from the same tr…	[Modi, Yasha; John, Vishak; Warman, Roberto; Hess, Ditte; Murray, Timothy G.; Berrocal, Audina M.] Univ Miami, Miller Sch Med, Bascom Palmer Eye Inst, Dept Ophthalmol, Miami, FL 33136 USA	Bascom Palmer Eye Institute; University of Miami	Modi, Y (corresponding author), Bascom Palmer Eye Inst, 900 NW 17th St, Miami, FL 33136 USA.	ymodi@med.miami.edu							6	1	1	0	5	MOSBY-ELSEVIER	NEW YORK	360 PARK AVENUE SOUTH, NEW YORK, NY 10010-1710 USA	1091-8531	1528-3933		J AAPOS	J. AAPOS	OCT	2013	17	5
J	Rostene, W; Denoyer, A; Baudouin, C				Rostene, William; Denoyer, Alexandre; Baudouin, Christophe			Chemokines: new insights in the treatment of glaucoma and inflammatory diseases of the ocular surface	BULLETIN DE L ACADEMIE NATIONALE DE MEDECINE			French	Article						CHEMOKINES; CHEMOKINE CXCL12; RECEPTORS; CXCR4; RECEPTORS; CXCR3; GLAUCOMA; INFLAMMATION; BENZALKONIUM COMPOUNDS		The celebrations of the 200th anniversary of Claude Bernard's birth ( 1813) give us the opportunity to recall all the pioneer work carried out by the great physiologist, which still remains relevant in both scientific and medical fields. The description that tissues are floating in a liquid milieu bringing survival molecules and allowing homeostasis, is particularly illustrated in the physiopatho…	[Rostene, William; Denoyer, Alexandre; Baudouin, Christophe] UPMC, CNRS, INSERM, Inst Vis,UMRS 968, Paris, France	Centre National de la Recherche Scientifique (CNRS); Institut National de la Sante et de la Recherche Medicale (Inserm); Sorbonne Universite	Rostene, W (corresponding author), Inst Vis, UMRS 968, 17 Rue Moreau, F-75012 Paris, France.	William.rostene@inserm.fr	DENOYER, Alexandre/AAS-6605-2021; Rostene, William/F-2754-2017	DENOYER, Alexandre/0000-0003-4730-0425; ROSTENE, WILLIAM/0000-0003-0409-5361; Baudouin, Christophe/0000-0003-1743-6698					9	0	0	0	2	ELSEVIER MASSON SAS EDITEUR	ISSY LES MOULINEAUX CEDEX	62, RUE CAMILLE DESMOULINS, ISSY LES MOULINEAUX CEDEX, 92442, FRANCE	0001-4079			B ACAD NAT MED PARIS	Bull. Acad. Natl. Med.	OCT	2013	197	7
J	Vojnikovic, B; Micovic, V; Stefanac-Nadarevic, V; Malatestinic, D; Kresina, HG; Nadarevic, T; Peternel, R; Kresina, S; Zuza-Zeneral, I; Grubesic, A				Vojnikovic, Bozo; Micovic, Vladimir; Stefanac-Nadarevic, Vesna; Malatestinic, Dulija; Kresina, Helena Glibotic; Nadarevic, Tin; Peternel, Renata; Kresina, Sandro; Zuza-Zeneral, Iva; Grubesic, Aron			Refractive Errors in Children of Primorsko-Goranska County - Epidemiological study	COLLEGIUM ANTROPOLOGICUM			English	Article						childhood; refractive error; epidemiological study; Primorsko-Goranska County; Croatia		Three institutions: Teaching Institute of Public Health of Primorsko-Goranska County, Croatian Association)Albert Einsteim and Eye Clinic Dr B.Vojnikovic Rijeka agreed a five-year project to study children 's health status of vision at Primorsko-Goranska County. Main task was the study of damage of vision in children due to prolonged sun exposure. Examination were conducted on a three locations, …	[Vojnikovic, Bozo] Dr B Vojnikovic Eye Polyclin, Rijeka, Croatia; [Micovic, Vladimir; Malatestinic, Dulija] Univ Rijeka, Sch Med, Dept Publ Hlth, Rijeka, Croatia; [Stefanac-Nadarevic, Vesna] Univ Rijeka, Sch Med, Dept Family Med, Rijeka, Croatia; [Nadarevic, Tin; Grubesic, Aron] Univ Rijeka, Rijeka, Croatia; [Vojnikovic, Bozo; Peternel, Renata] Velika Gorica Univ Appl Sci, Velika Gorica 10410, Cr…	University of Rijeka; University of Rijeka; University of Rijeka; University of Rijeka	Vojnikovic, B (corresponding author), Velika Gorica Univ Appl Sci, Zagrebacka 5, Velika Gorica 10410, Croatia.	decv@decv.com	Nadarević, Tin/MTC-2945-2025; Micovic, Vladimir/R-4240-2018; Grubesic, Aron/R-4358-2018	Micovic, Vladimir/0000-0002-0973-4823; Grubesic, Aron/0000-0002-8522-9693					5	1	1	0	0	COLLEGIUM ANTROPOLOGICUM	ZAGREB	INST ANTHROPOLOGICAL RESEARCH, GAJEVA 32, PO BOX 290, HR-10000 ZAGREB, CROATIA	0350-6134			COLLEGIUM ANTROPOL	Coll. Anthropol.	APR	2013	37
J	Chrissafidou, A; Musch, E				Chrissafidou, A.; Musch, E.			Peripheral polyneuropathy and bilateral optic neuropathy during treatment of chronic hepatitis C	DEUTSCHE MEDIZINISCHE WOCHENSCHRIFT			German	Article						interferon-alpha; pegylated interferon-alpha; hepatitis C; peripheral neuropathy; optic neuropathy	INFLAMMATORY DEMYELINATING POLYNEUROPATHY; PEGYLATED INTERFERON-ALPHA; VIRUS-INFECTION; THERAPY; RIBAVIRIN; COMPLICATIONS	History and clinical findings: A 54-year-old female patient with recently confirmed chronic hepatitis C, genotype Ib and positive HCV-RNA was admitted for interferon induction therapy. Examinations: Physical examination findings were normal. Ultrasound examination of the abdomen revealed slightly compacted liver structure with otherwise no pathological findings. Laboratory results showed marginal…			Chrissafidou, A (corresponding author), Facharztin Allgemeinmed, Kirschallee 6, D-53115 Bonn, Germany.	achrissaf@web.de							26	4	4	0	0	GEORG THIEME VERLAG KG	STUTTGART	RUDIGERSTR 14, D-70469 STUTTGART, GERMANY	0012-0472	1439-4413		DEUT MED WOCHENSCHR	Dtsch. Med. Wochenschr.	APR 30	2009	134	18
J	Zaborowski, AG; Parbhoo, D; Chinniah, K; Visser, L				Zaborowski, Anthony G.; Parbhoo, Dharmesh; Chinniah, Kogie; Visser, Linda			Uveitis in children with human immunodeficiency virus-associated arthritis	JOURNAL OF AAPOS			English	Article							INFECTION; MANIFESTATIONS	PURPOSE To describe the ocular inflammatory manifestations and clinical characteristics of children with Human Immunodeficiency Virus (HIV)-associated arthritis. METHODS A retrospective review of the charts of children With chronic Uveitis and HIV-associated arthritis seen between June 2004 and September 2006 at Inkosi Albert Luthuli Central Hospital, Durban, South Africa. The following data were…	[Zaborowski, Anthony G.; Parbhoo, Dharmesh; Visser, Linda] Univ KwaZulu Natal, Dept Ophthalmol, Nelson R Mandela Sch Med, Durban, South Africa; [Chinniah, Kogie] Univ KwaZulu Natal, Dept Paediat & Child Hlth, Nelson R Mandela Sch Med, Durban, South Africa	University of Kwazulu Natal; University of Kwazulu Natal	Zaborowski, AG (corresponding author), Univ KwaZulu Natal, Dept Ophthalmol, Nelson R Mandela Sch Med, Private Bag 7, ZA-4013 Congella, South Africa.	azaborowski@mweb.co.za	Visser, Linda/N-5281-2013	Chinniah, Kogielambal/0009-0006-3869-8071					13	9	9	0	2	MOSBY-ELSEVIER	NEW YORK	360 PARK AVENUE SOUTH, NEW YORK, NY 10010-1710 USA	1091-8531			J AAPOS	J. AAPOS	DEC	2008	12	6
J	Travieso, D; Lederman, SJ				Travieso, David; Lederman, Susan J.			Assessing subclinical tactual deficits in the hand function of diabetic blind persons at risk for peripheral neuropathy	ARCHIVES OF PHYSICAL MEDICINE AND REHABILITATION			English	Article						blindness; diabetic neuropathies; disability evaluation; hand; rehabilitation; touch	MANUAL DEXTERITY; PASSIVE TOUCH; PERCEPTION; RECOGNITION; POPULATION; ROUGHNESS; PEOPLE; GRIP	Objective: To assess subclinical impairments in tactual hand function produced by diabetes mellitus in late-blind adults with diabetic retinopathy. Design: The survey compares diabetic blind with nondiabetic blind and blindfolded sighted controls in terms of their performance on a battery of tests that assess tactual hand function. Setting: Subjects were evaluated at their rehabilitation program …	[Lederman, Susan J.] Queens Univ, Dept Psychol, Kingston, ON K7L 3N6, Canada; [Travieso, David] Univ Autonoma Madrid, Fac Psicol, Madrid, Spain	Queens University - Canada; Autonomous University of Madrid	Lederman, SJ (corresponding author), Queens Univ, Dept Psychol, Kingston, ON K7L 3N6, Canada.	susan.lederman@queensu.ca	Travieso, David/B-5321-2012	Travieso, David/0000-0002-5804-4212					39	14	16	0	2	W B SAUNDERS CO-ELSEVIER INC	PHILADELPHIA	1600 JOHN F KENNEDY BOULEVARD, STE 1800, PHILADELPHIA, PA 19103-2899 USA	0003-9993			ARCH PHYS MED REHAB	Arch. Phys. Med. Rehabil.	DEC	2007	88	12
J	Yong, VKY; Umapathi, T; Aung, T; Tan, NCK; Lee, JJ; Liew, GC; Yip, CC; Foster, PJ; Chew, PTK				Yong, VKY; Umapathi, T; Aung, T; Tan, NCK; Lee, JJ; Liew, GC; Yip, CC; Foster, PJ; Chew, PTK			Systemic autonomic function in subjects with primary angle-closure glaucoma: a comparative study of symptomatic and asymptomatic disease presentation	CLINICAL AND EXPERIMENTAL OPHTHALMOLOGY			English	Article						autonomic failure; autonomic function; disease presentation; primary angle-closure glaucoma	ANTERIOR-CHAMBER DEPTH; PREVALENCE; POPULATION; EPIDEMIOLOGY; SINGAPORE; ESKIMOS; SEX; AGE	Background: Autonomic dysfunction is thought to be a contributory factor in primary angle-closure glaucoma (PACG) by precipitating pupil block in anatomically predisposed eyes. This study aimed to compare systemic autonomic function between subjects who had suffered a previous episode of acute angle closure (symptomatic PACG), those who had asymptomatic PACG, and age and sex-matched controls. Met…	Tan Tock Seng Hosp, Inst Eye, Singapore 308433, Singapore; Natl Inst Neurosci, Singapore, Singapore; Singapore Natl Eye Ctr, Singapore, Singapore; Natl Univ Singapore, Singapore 117548, Singapore; UCL, Inst Ophthalmol, London, England	Tan Tock Seng Hospital; National Neuroscience Institute (NNI); Singapore National Eye Center; National University of Singapore; University of London; University College London	Tan Tock Seng Hosp, Inst Eye, 11 Jalan Tan Tock Seng, Singapore 308433, Singapore.	Vernon_Yong@ttsh.com.sg	Foster, Paul/V-7288-2019; thirugnanam, umapathi/JJE-9196-2023	Tan, Nigel Choon Kiat/0000-0002-9213-5572; Foster, Paul/0000-0002-4755-177X					25	7	9	0	1	WILEY	HOBOKEN	111 RIVER ST, HOBOKEN 07030-5774, NJ USA	1442-6404	1442-9071		CLIN EXP OPHTHALMOL	Clin. Exp. Ophthalmol.	APR	2004	32	2
J	Feltgen, N; Mueller, H; Ott, B; Frenz, M; Funk, J				Feltgen, N; Mueller, H; Ott, B; Frenz, M; Funk, J			Combined endoscopic erbium:YAG laser goniopuncture and cataract surgery	JOURNAL OF CATARACT AND REFRACTIVE SURGERY			English	Article							OPEN-ANGLE GLAUCOMA; TRABECULAR ABLATION; GONIOTOMY; PHACOEMULSIFICATION; MESHWORK	Purpose: To study the safety and efficacy of endoscopic erbium:YAG (Er:YAG) laser goniopuncture combined with cataract surgery to treat glaucoma. Setting: Department of Ophthalmology, Albert-Ludwigs-University Freiburg, Freiburg, Germany, and Institute of Applied Physics, University of Bern, Bern, Switzerland. Methods: In this nonrandominized clinical trial, 20 eyes of 20 patients with cataract a…	Univ Freiburg, Augenklin, Dept Ophthalmol, D-79106 Freiburg, Germany; Univ Bern, Inst Appl Phys, CH-3012 Bern, Switzerland	University of Freiburg; University of Bern	Feltgen, N (corresponding author), Univ Freiburg, Augenklin, Dept Ophthalmol, Killianstr 5, D-79106 Freiburg, Germany.			Frenz, Martin/0000-0002-6741-9434; Philippin, Heiko/0000-0002-5380-6994					19	12	15	0	1	ELSEVIER SCIENCE INC	NEW YORK	360 PARK AVE SOUTH, NEW YORK, NY 10010-1710 USA	0886-3350			J CATARACT REFR SURG	J. Cataract. Refract. Surg.	NOV	2003	29	11
J	Eytan, VL; Mercier, C; Paquier, C; Carpentier, F				Eytan, VL; Mercier, C; Paquier, C; Carpentier, F			Emergency unilateral mydriasis	PRESSE MEDICALE			French	Article							CAROTID-ARTERY DISSECTION; HORNERS-SYNDROME; ANISOCORIA; PUPILS	Unequal pupils or anisocoria is frequent and can be physiological, benign or life threatening. Variations in the pupil Constriction depends on the parasympathetic system and dilatation on the sympathetic system. In parasympathetic disorders Peripheral or central neurological causes can be distinguished, among which acute cerebral lesions with compression of the trunk are the most dramatic. Differ…	Hop Cantonal Univ Geneva, Med Clin 2, CH-1206 Geneva, Switzerland; CHU Grenoble, Serv Accueil Urgences, F-38043 Grenoble, France	University of Geneva; CHU Grenoble Alpes; Communaute Universite Grenoble Alpes; Universite Grenoble Alpes (UGA)	Eytan, VL (corresponding author), Hop Cantonal Univ Geneva, Med Clin 2, 24 Rue Micheli Crest, CH-1206 Geneva, Switzerland.								22	0	1	0	1	MASSON EDITEUR	PARIS 06	120 BLVD SAINT-GERMAIN, 75280 PARIS 06, FRANCE	0755-4982			PRESSE MED	Presse Med.	JUN 22	2002	31	22
J	Stewart, WC; Sharpe, ED; Stewart, JA; Hott, EC				Stewart, WC; Sharpe, ED; Stewart, JA; Hott, EC			The safety and efficacy of timolol 0.5% in xanthan gum versus timolol gel forming solution 0.5%	CURRENT EYE RESEARCH			English	Article						timolol; gel; forming; solution		Purpose. To evaluate the efficacy and safety of timolol maleate 0.5% gel forming solution (TXE, Merck) versus timolol maleate 0.5% gel forming solution (TXG, Falcon) in primary open-angle glaucoma and ocular hypertension patients. Methods. Following a washout period patients were randomly begun on either TXE or TXG each given once each morning for six weeks (Period 1). Patients then were crossed …	Pharmaceut Res Corp, Charleston, SC 29412 USA; Univ S Carolina, Sch Med, Carolina Eye Inst, Columbia, SC USA; Charleston Res Co LLC, Mt Plesant, SC USA	University of South Carolina System; University of South Carolina Columbia	Stewart, WC (corresponding author), Pharmaceut Res Corp, 1639 Tatum St, Charleston, SC 29412 USA.								11	13	17	1	3	SWETS ZEITLINGER PUBLISHERS	LISSE	P O BOX 825, 2160 SZ LISSE, NETHERLANDS	0271-3683			CURR EYE RES	Curr. Eye Res.	MAY	2002	24	5
J	Fujikado, T; Tsujikawa, K; Tamura, M; Hosohata, J; Kawasaki, Y; Tano, Y				Fujikado, T; Tsujikawa, K; Tamura, M; Hosohata, J; Kawasaki, Y; Tano, Y			Effect of a nitric oxide synthase inhibitor on lens-induced myopia	OPHTHALMIC RESEARCH			English	Article						experimental myopia; nitric oxide; lens-induced myopia; chick; electroretinography	FORM-DEPRIVATION MYOPIA; EYE GROWTH; CHICKS; CELLS	Purpose: It has still not been determined whether the retinal mechanism causing form-deprivation myopia (FDM) is different from that causing lens-induced myopia (LIM). We previously reported that FDM was blocked by an intravitreal injection of the nitric oxide (NO) synthase inhibitor, N-nitro-L-arginine methyl ester (L-NAME), In this study, we investigated the effect of L-NAME on LIM in chicks. M…	Osaka Univ, Grad Sch Med, Dept Appl Med Engn, Suita, Osaka 5650871, Japan; Osaka Univ, Grad Sch Med, Dept Ophthalmol, Suita, Osaka 5650871, Japan	Osaka University; Osaka University	Fujikado, T (corresponding author), Osaka Univ, Grad Sch Med, Dept Appl Med Engn, Room G4,2-2 Yamadaoka, Suita, Osaka 5650871, Japan.								16	20	22	1	1	KARGER	BASEL	ALLSCHWILERSTRASSE 10, CH-4009 BASEL, SWITZERLAND	0030-3747			OPHTHALMIC RES	Ophthalmic Res.	MAR-APR	2001	33	2
[truncated: 22 more columns]
